# Supplementary material for: Areca nut consumption with and without tobacco among the adult population: a nationally representative study from India
Source: PubMed Central journal article supplement — BMJ Open. 2021 Jun 15;11(6):e043987. doi: 10.1136/bmjopen-2020-043987 (PMC8208015; doi:10.1136/bmjopen-2020-043987), 2021-06-15
Supplement: bmjopen-2020-043987.draft_revisions.pdf [file bmjopen-2020-043987.draft_revisions.pdf]

# BMJ Open

BMJ Open is committed to open peer review. As part of this commitment we make the peer review history of every article we publish publicly available.

When an article is published we post the peer reviewers' comments and the authors' responses online. We also post the versions of the paper that were used during peer review. These are the versions that the peer review comments apply to.

The versions of the paper that follow are the versions that were submitted during the peer review process. They are not the versions of record or the final published versions. They should not be cited or distributed as the published version of this manuscript.

BMJ Open is an open access journal and the full, final, typeset and author-corrected version of record of the manuscript is available on our site with no access controls, subscription charges or pay-per-view fees (<http://bmjopen.bmj.com>).

If you have any questions on BMJ Open's open peer review process please email [info.bmjopen@bmj.com](mailto:info.bmjopen@bmj.com)

# BMJ Open

## Areca nut use among the adult population in India: a nationally representative cross-sectional study

|                               |                                                                                                                                                                                                                                                                                                                                                                                                                                                |
|-------------------------------|------------------------------------------------------------------------------------------------------------------------------------------------------------------------------------------------------------------------------------------------------------------------------------------------------------------------------------------------------------------------------------------------------------------------------------------------|
| Journal:                      | <i>BMJ Open</i>                                                                                                                                                                                                                                                                                                                                                                                                                                |
| Manuscript ID                 | bmjopen-2020-043987                                                                                                                                                                                                                                                                                                                                                                                                                            |
| Article Type:                 | Original research                                                                                                                                                                                                                                                                                                                                                                                                                              |
| Date Submitted by the Author: | 20-Aug-2020                                                                                                                                                                                                                                                                                                                                                                                                                                    |
| Complete List of Authors:     | Singh, Prashant Kumar; National Institute of Cancer Prevention and Research,<br>Yadav, Amit<br>Singh, Lucky; National Institute of Medical Statistics<br>Mazumdar, Sumit; Centre for Health Economics<br>Sinha, Dharendra ; South-East Regional Office, World Health Organisation, WHO FCTC Global Hub on Smokeless Tobacco<br>Straif, Kurt; International Agency for Research on Cancer<br>Singh, Shalini; Indian Council of Medical Research |
| Keywords:                     | Public health < INFECTIOUS DISEASES, Health policy < HEALTH SERVICES ADMINISTRATION & MANAGEMENT, Cancer pain < ONCOLOGY                                                                                                                                                                                                                                                                                                                       |
|                               |                                                                                                                                                                                                                                                                                                                                                                                                                                                |

SCHOLARONE™  
Manuscripts

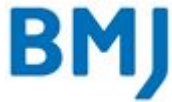

I, the Submitting Author has the right to grant and does grant on behalf of all authors of the Work (as defined in the below author licence), an exclusive licence and/or a non-exclusive licence for contributions from authors who are: i) UK Crown employees; ii) where BMJ has agreed a CC-BY licence shall apply, and/or iii) in accordance with the terms applicable for US Federal Government officers or employees acting as part of their official duties; on a worldwide, perpetual, irrevocable, royalty-free basis to BMJ Publishing Group Ltd ("BMJ") its licensees and where the relevant Journal is co-owned by BMJ to the co-owners of the Journal, to publish the Work in this journal and any other BMJ products and to exploit all rights, as set out in our [licence](#).

The Submitting Author accepts and understands that any supply made under these terms is made by BMJ to the Submitting Author unless you are acting as an employee on behalf of your employer or a postgraduate student of an affiliated institution which is paying any applicable article publishing charge ("APC") for Open Access articles. Where the Submitting Author wishes to make the Work available on an Open Access basis (and intends to pay the relevant APC), the terms of reuse of such Open Access shall be governed by a Creative Commons licence – details of these licences and which [Creative Commons](#) licence will apply to this Work are set out in our licence referred to above.

Other than as permitted in any relevant BMJ Author's Self Archiving Policies, I confirm this Work has not been accepted for publication elsewhere, is not being considered for publication elsewhere and does not duplicate material already published. I confirm all authors consent to publication of this Work and authorise the granting of this licence.

1  
2  
3  
4 **Areca nut use among the adult population in India: a nationally representative cross-**  
5 **sectional study**  
6  
7

8 Prashant Kumar Singh<sup>1\*</sup>, Amit Yadav<sup>2</sup>, Lucky Singh<sup>3</sup>, Sumit Mazumdar<sup>4</sup>, Dharendra N. Sinha<sup>5</sup>,  
9 Kurt Straif<sup>6</sup>, Shalini Singh<sup>7</sup>  
10  
11  
12  
13  
14

15 **Running head:** Areca nut use in India  
16

17 **Word count:** 3168 (excluding abstract, references, tables)  
18

19 **Declaration of Competing Interest:** All the authors declare that they have no conflict of  
20 interest.  
21  
22  
23  
24  
25  
26  
27  
28  
29  
30  
31  
32  
33

---

34  
35 \* Corresponding Author: Prashant Kumar Singh

36 <sup>1</sup> Division of Preventive Oncology, ICMR National Institute of Cancer Prevention and Research,  
37 India Council of Medical Research, Noida, India. Email: [prashants.geo@gmail.com](mailto:prashants.geo@gmail.com)  
38

39 <sup>2</sup> Center for Tobacco Control Research and Education, University of California, San Francisco,  
40 USA. Email: [advocateamit@msn.com](mailto:advocateamit@msn.com)  
41

42 <sup>3</sup> ICMR National Institute of Medical Statistics, India Council of Medical Research, Ansari  
43 Nagar, New Delhi, India. Email: [lucky.5bhu@gmail.com](mailto:lucky.5bhu@gmail.com)  
44

45 <sup>4</sup> Centre for Health Economics, University of York, YO10 5DD, United Kingdom. Email:  
46 [sumitmazumdar@gmail.com](mailto:sumitmazumdar@gmail.com)  
47

48 <sup>5</sup> School of Preventive Oncology, Patna, India. Email: [dhirendrasinha1@gmail.com](mailto:dhirendrasinha1@gmail.com)

49 <sup>6</sup>International Agency for Research on Cancer (IARC), Lyon, France. Email:  
50 [straif.kurt@gmail.com](mailto:straif.kurt@gmail.com)  
51

52 <sup>7</sup> ICMR National Institute of Cancer Prevention and Research, India Council of Medical  
53 Research (ICMR), Noida, India & WHO – FCTC Global Knowledge Hub on Smokeless  
54 Tobacco, ICMR National Institute of Cancer Prevention and Research, Noida, India. Email:  
55 [shalinisingh.icmr@gmail.com](mailto:shalinisingh.icmr@gmail.com)  
56  
57  
58  
59  
60

1  
2  
3 **Areca nut use among the adult population in India: a nationally representative cross-**  
4 **sectional study**  
5

6  
7 **Abstract**  
8

9  
10 **Objective:** Areca nut is one of the widely consumed substance abuse globally, after nicotine,  
11 ethanol and caffeine and classified as carcinogenic to humans. This study examines the disparity  
12 and determinants of areca nut use with and without tobacco in India.  
13  
14  
15

16  
17 **Design:** Nationally representative cross-sectional study.  
18

19  
20 **Participants:** We utilized nationally representative Global Adult Tobacco Survey (GATS) 2016-  
21 17. The analytical sample size was 74,037 individual's aged 15 years and above.  
22  
23  
24

25 **Measures:** Current use of areca nut without tobacco and with tobacco.  
26  
27

28 **Method:** We examined determinants of areca nut consumption (without tobacco and with  
29 tobacco) using multinomial logistic regression, accounting for complex survey design.  
30  
31  
32

33 **Results:** Finding shows 23.9% (95%CI 23.1-24.8) adult population consume areca nut, which  
34 accounts for approximately 223.79 million users in India. Out of total areca nut users, 9.7%  
35 (95%CI 9.1-10.4) users consumed areca nut with tobacco. When compared to females, males  
36 were more prone to consume areca nut without tobacco (RR=1.13;95%CI 1.07-1.20) and with  
37 tobacco (RR=2.02; 95%CI 1.85-2.21). Age, marital status, education, occupation, caste, religion  
38 and region were significantly associated with areca nut use. However, the direction of  
39 association differs with respect to the use of areca nut with tobacco and without tobacco.  
40  
41  
42  
43  
44  
45  
46  
47  
48

49 **Conclusion:** Areca nut is not explicitly covered by the WHO Framework Convention on  
50 Tobacco Control. The ongoing tobacco control efforts would not yield the desired outcome until  
51 greater attention to areca nut use is reflected in the formulated health policies in the country.  
52  
53  
54  
55  
56  
57  
58  
59  
60

1  
2  
3 **Key words:** Areca nut, smokeless tobacco, GATS, India  
4  
5  
6  
7

8  
9 **Strength and Limitations of this study**  
10

- 11
- 12 • Despite growing scientific evidence of high addictiveness and several ill effects  
13 associated with areca nut use, research on areca nut has not received much attention.  
14
  - 15 • Using nationally representative survey, our analysis show nearly one-fourth adult  
16 population (223.79 million) adults consume areca nut in India, with higher use among  
17 adult men than women.  
18
  - 19 • Considerbale regional variation exists with four states namely Uttar Pradesh (49.9  
20 million), Maharashtra (26.7 million), Karnataka (19.8 million) and Tamil Nadu (17.7  
21 million) accounts for half of the areca nut users in the country.  
22
  - 23 • Age, sex, education, occupation, social group and regious affiliation significantly  
24 determines areca nut use in the country.  
25
  - 26 • Study is based on 15 years and older population, whereas the areca nut habits often start  
27 at younger age.  
28  
29  
30  
31  
32  
33  
34  
35  
36  
37  
38  
39

40 **Funding statement**  
41

42  
43  
44 This research study received no specific grant from any funding agency in the public,  
45 commercial or not-for-profit sectors.  
46  
47  
48

49 **Competing Interests statement**  
50

51  
52 None declared.  
53  
54  
55  
56  
57  
58  
59  
60

**Authors' contribution**

PKS conceived the study. PKS and LS performed statistical analysis. PKS, LS and AY analyzed and interpreted the data. PKS and AY drafted the manuscript. SM, DN, KS and SS provided comments and contributed to the development of the final draft of the manuscript. All authors have supervised and approved the manuscript.

**Data sharing statement**

Data utilized by the study is available by emailing [prashants.geo@gmail.com](mailto:prashants.geo@gmail.com).

## Introduction

Areca nut is one of the widely consumed substance abuse globally, after nicotine, ethanol and caffeine[1,2]. Owing to its addictive properties, areca nut is estimated to be consumed by hundreds of millions of people across various countries [3]. However, addiction to areca nut is largely prevalent in many Asia-Pacific countries and by emigrants from these countries in other parts of world. In countries such as mainland China, Taiwan, areca nut has been used in other preparations as well [3].

The International Agency for Cancer Research (IARC) classified areca nut use with or without tobacco as carcinogenic to humans[4]. A meta analysis found that areca nut use with tobacco (Relative Risk 7.03; 95%CI, 4.68–10.56) and areca nut use without tobacco (Relative Risk 3.22; 95%CI, 2.11–4.92) cause cancer of oral cavity in Indian subcontinent[5]. Furthermore, studies have documented that areca nut use adversely affects all organs of the human body[1,6]. Studies also found that areca nut use has been associated with dependence in users [7] and withdrawal effects with high severity of dependence [8] similar to those observed for nicotine dependence [8]. Children in their early age typically begin chewing habits with different kinds of areca nut product[9].

Despite growing scientific evidence of high addictiveness and several ill effects associated with areca nut use, research on areca nut has not received much attention[3]. The large global and national movement that addresses tobacco control under the ambit of the WHO Framework Convention on Tobacco Control (FCTC) has focused primarily on smoking and has been less effective in controlling SLT[10]. Tobacco control policies, though, applicable to areca nut products containing tobacco, considerable number of people consume areca nut without tobacco, which poses greater public health challenges in controlling and regulating the substance [11].



Existing studies on areca nut lack representativeness. We searched PubMed for articles with no language restrictions from all time to 20 March 2020, using the search terms ["disparity" OR "determinant" OR "factor"] AND ["areca nut" OR "betel nut" OR "supari" OR "suppari" OR "supaari" OR "betel quid"] AND ["India"] to review published and peer-reviewed literature. All existing studies that we identified were restricted to a specific geographical area or population groups in India and none of them were nationally representative. None of the existing studies have examined diverse habits of areca nut use, its disparity and determinants using nationally representative survey. A recent global review calls for more research to understand the epidemiology of areca nut use across different populations and geographies [3].

While India's share to overall areca nut production and consumption remains at the top, no attempts have been made to explore the patterns and determinants of the use of areca nut based on large scale representative surveys. This study aims to examine the disparity and determinants of areca nut use, with and without tobacco using nationally-representative Global Adult Tobacco Survey (GATS) conducted in 2016-17.

## **Methods and materials**

### ***Study Design and Participants***

We utilized nationally representative cross-sectional Global Adult Tobacco Survey (GATS) 2016-17, conducted in all 29 states and three Union Territories (UTs) of India [12]. The study included whole GATS sample of 74,037 adults aged 15 and above. A multi-stage sampling design separately for rural and urban areas was adopted to draw a representative sample considering the 2011 census population figures. The household and individual response rate was 93%. Further details related to survey methodology, sampling design, household and individual

1  
2  
3 selection, data collection, management and monitoring procedures have been described  
4  
5 elsewhere[12].  
6  
7

### 8 ***Dependent variables*** 9

10  
11 The outcome variable was current use of areca nut use, assessed based on following questions  
12  
13 covered in the GATS:  
14  
15

- 16 1. Do you consume *pan masala* without tobacco?
- 17 2. Do you consume betel quid without tobacco?
- 18 3. Do you consume areca nut of any type, plain, powdered or flavoured?
- 19 4. On average, how many times a day do you use the following products? Also, let me know  
20  
21 if you use the product, but not every day – Betel quid with tobacco?
- 22 5. On average, how many times a day do you use the following products? Also, let me know  
23  
24 if you use the product, but not every day – *Gutka*, areca nut-tobacco lime mixture, or  
25  
26 *mawa*?
- 27 6. On average, how many times a day do you use the following products? Also, let me know  
28  
29 if you use the product, but not every day – *Pan masala* with tobacco?  
30  
31  
32  
33  
34  
35  
36  
37  
38  
39

40 Based on the above-mentioned questions asked in GATS, we constructed three sets of  
41  
42 variables: (i) areca nut use without tobacco, (ii) areca nut use with tobacco and (iii) areca nut use  
43  
44 with and without tobacco. Definition of specific products can be found with the GATS 2 national  
45  
46 report[13].  
47  
48

- 49 (i) Areca nut use without only tobacco includes  
50  
51 a. *Pan masala* without tobacco  
52  
53 b. Betel quid without tobacco  
54  
55  
56  
57  
58  
59  
60

- 1
- 2
- 3 c. Areca nut of any type
- 4
- 5 (ii) Areca nut use with only tobacco includes
- 6
- 7 a. *Gutka*, areca nut-tobacco lime mixture, or *mawa*
- 8
- 9
- 10 b. *Pan masala* with tobacco
- 11
- 12 c. Betel quid with tobacco
- 13
- 14 (iii) Both forms - Areca nut use with and without tobacco at the same time.
- 15
- 16 (iv) Any form –who uses any of these products
- 17
- 18
- 19

### 20 ***Independent variables***

21  
22 A range of socioeconomic, demographic, awareness related and contextual level variables  
23 included in this study[14–18]. These variables include age (categorized as 15-18, 19-23, 24-30,  
24 31-40, 41-50, 51-60 and 60+) and sex as male and female. Individual's education was measured  
25 as: (i) no education, (ii) below than primary, (iii) primary completed, (iv) below than secondary,  
26 (v) secondary completed, (vi) completed higher secondary, (vii) completed college/university  
27 and (viii) completed post-graduate level. Individual's occupation on the other side was assessed  
28 based on self-reported information as (i) student, (ii) government sector, (iii) non-government  
29 sector, (iv) casual/ daily labourer, (v) self-employed, (vi) homemaker, (vii) retired and (viii)  
30 unemployed.

31  
32 A wealth index was calculated based on availability of electricity, flush toilet, radio, television,  
33 fixed telephone or cell phone, refrigerator, washing machine, moped/scooter/motorcycle and car  
34 using PCA (Principle Component Analysis) methodology[19]. Individual's were divided into  
35 five wealth quintiles based on their household score ranges from 1 being poorest to 5 being  
36 wealthiest, with each category representing 20 percent of the score [19].

37  
38 A composite knowledge variable which measures the poor health impact of smokeless tobacco

1  
2  
3 use was constructed based considering following information asked in the survey: smokeless  
4 tobacco causes serious illness (yes/no), smokeless tobacco cause oral cancer (yes/no), smokeless  
5 tobacco cause dental diseases (yes/no), smokeless tobacco cause harm to fetus during pregnancy  
6 (yes/no), and do you think tobacco leads to addiction (yes/no). The new knowledge variable  
7 categorised as: (i) 'no, to all five awareness' (ii) 'no, to at least one awareness' and (iii) 'yes, to  
8 all five awareness'. Social (caste) group was categorised based on individual's self-reporting as  
9 Scheduled Castes (SCs), Scheduled Tribes (STs), Other Backward Classes (OBCs) and others.  
10 These broad categorization of social group is based on their socioeconomic disadvantage in  
11 education, health, nutrition, employment by federal government. Religion captures self-reported  
12 follower/believer of Hinduism, Islam, Christianity and others (which mainly include Sikhs, Jains,  
13 Buddhists and non-believers). Study also considered place of residence as rural and urban as well  
14 as all 29 states and three UTs in the analysis.

### 31 *Analytical Strategy*

32  
33  
34 At first, prevalence of areca nut consumption with and without tobacco at national and sub-  
35 national levels along with rural-urban and male-female differences was shown.  $\chi^2$  tests were  
36 performed to examine the differences in prevalence of areca nut use with all independent  
37 variables. To examine the associated between areca nut use with various socioeconomic and  
38 demographic characteristics, multinomial logistic regression was used. In the multinomial logit  
39 regression, it is assumed that log odds of outcome/dependent variable either follow linear form  
40 or non-binary form; and each outcome/dependent variable is modelled relative to the baseline  
41 group or outcome[20]. In this study, instead of binomial we have considered (i) 'non-areca nut  
42 user (baseline group)', (ii) 'areca nut use with tobacco', (iii) 'areca nut use without tobacco' and  
43 lastly (iv) 'dual user'. The study reported the relative risk ratio (RR) along with 95% confidence  
44  
45  
46  
47  
48  
49  
50  
51  
52  
53  
54  
55  
56  
57  
58  
59  
60

1  
2  
3 intervals [21]. We calculated the population burden based on GATS weighted sample population  
4  
5 figures, which were provided in the GATS India report. Appropriate adjustment for sampling  
6  
7 weights was considered during the analysis using STATA 15 version [22].  
8  
9

### 10 ***Ethics statement***

11  
12  
13 The second round of GATS obtained ethical clearance from the Ethics Committee of Tata  
14  
15 Institute of Social Sciences[13]. No ethics clearance was required for this study, as we used  
16  
17 secondary analysis using publicly available data.  
18  
19

### 20 ***Patient and public involvement***

21  
22  
23 No patients were involved in the development of the research question or the outcome measures  
24  
25 nor the design of the study.  
26  
27

## 28 **Results**

### 29 ***Descriptive statistics***

30  
31  
32 Of the 74037 sample, 40265 (48.9%) were women and 33772 (51.1%) were men, and 47549  
33  
34 (65.5%) individuals were resided in rural areas. One out of four respondents were illiterate and  
35  
36 nearly 78% were aware about the adverse health effects of SLT use (Supplementary table 1).  
37  
38

39  
40  
41 We found that overall, betel quid without tobacco (8.7%; 95%CI 6.7-10.2) was consumed  
42  
43 largely, followed by areca nut of any type (8%; 95%CI 5.9-10.3) at the national level (Table 1).  
44  
45

46  
47 Among men, the prevalence of *gutka*, areca nut-tobacco lime mixture or *mawa* was consumed  
48  
49 the most (17.8%; 95%CI 15.1-20.2), whereas, among women, betel quid without tobacco was  
50  
51 largely consumed (9.0%; 95%CI 6.1-11.9). In urban areas, both betel quid without tobacco and  
52  
53 areca nut of any type were largely consumed, while in the rural areas it was mainly betel quid  
54  
55 without tobacco. Regional pattern suggests that betel quid with tobacco were predominately  
56  
57  
58  
59  
60

1  
2  
3 consumed in many north-eastern states, while betel quid without tobacco was mainly used in  
4  
5 south (Supplementary table 2).  
6  
7

### 8 ***Regional and socioeconomic disparity in areca nut*** 9

10  
11 We found 23.9 (95%CI 23.1-24.8) adults were consuming areca nut at national level and out of  
12  
13 this 14.2% (95%CI 13.6-14.9) were consuming without tobacco (Table 2). Areca nut use  
14  
15 without tobacco was largely being consumed across north-eastern states, apart from other bigger  
16  
17 states like Karnataka (28.8%; 95%CI 25.6-32.1), Tamil Nadu (25.5%; 95%CI 21.9-29.5) and  
18  
19 Maharashtra (20%; 95%CI 17.0-22.5). Nearly 223.4 million people out of total 932,488,000  
20  
21 population aged 15 and above consume areca nut in India (Table 3). The distribution of areca nut  
22  
23 user both in terms of population and proportion across states were as follows: Uttar Pradesh with  
24  
25 49.9 million users contributes to nearly 22% of all areca nut users, followed by Maharashtra with  
26  
27 26.7 million users (12%), Karnataka with 19.8 million (9%) and Tamil Nadu with 17.7 million  
28  
29 users (8%). Together, these four states share nearly 51% of all areca nut users in the country. Not  
30  
31 much difference exists between urban and rural areas in areca nut usage patterns (Supplementary  
32  
33 table 3). In 18 states/UTs, however, areca nut use was higher in urban areas than rural  
34  
35 counterparts. In 13 states/UTs, the opposite pattern was evident. Consumption of areca nut in any  
36  
37 form was higher among males as compared to females both at national level as well as in  
38  
39 majority of states (Supplementary table 4).  
40  
41  
42  
43  
44  
45

46 All forms of areca nut use was higher in the age group 31-50 years (Table 4). 28.8% men  
47  
48 (95%CI 27.7-30.0) and 27.1% widowed/separated/divorced (95%CI 25.3-29.1) were consuming  
49  
50 areca nut. Individuals who had completed below the primary level of schooling consumed higher  
51  
52 proportion of areca nut. Areca nut use was highest among daily wage labourers (30.2%; 95%CI  
53  
54  
55  
56  
57  
58  
59  
60

1  
2  
3 28.7-31.7). We found that STs (25.6%; 95%CI 23.0-27.5) and Muslims (30.8%; 95%CI 28.4-  
4  
5 33.2) were consuming higher rates of areca nut.  
6  
7

### 8 ***Determinants of areca nut use***

9

10  
11 Regression results suggest that the likelihood of areca nut use in both forms were positively  
12 associated with increase in age (Table 5), except that areca nut use without tobacco was lower  
13 among the age group 51 and above, as compared to the 15-18 age groups. Probability of areca  
14 nut use was higher among males as compared to females in all three forms. The likelihood of  
15 areca nut use without tobacco was higher across all the educational categories as compared to  
16 illiterate. However, areca nut with tobacco and dual-use was declining with increase in  
17 education. The likelihood of areca nut use with tobacco and dual-use was significantly higher  
18 among SCs than other social groups. Probability of all the three forms of areca nut use was  
19 higher among Muslims as compared to Hindus.  
20  
21  
22  
23  
24  
25  
26  
27  
28  
29  
30  
31

### 32 **Discussion**

33

34  
35 The findings of the study revealed that nearly one out of every four adults in India consumes  
36 areca nut, that is, almost 223.79 million people, making areca nut a much bigger public health  
37 challenge in dealing with substance abuse and addiction in the country. Moreover, nearly 10%  
38 consumed areca nut with tobacco. Thus, considering the wide range of adverse health impacts,  
39 effective implementation on banning of tobacco as an ingredient with areca nut products under  
40 regulation 2.3.4 of the Food Safety and Standards Regulation, 2011 and ban on manufacture and  
41 sale of areca nut products, as implemented in some of the states, is urgently needed [1].  
42  
43  
44  
45  
46  
47  
48  
49  
50

51 We found considerable regional and socioeconomic differences in the use of areca nut. In four  
52 states, Meghalaya, Assam, Mizoram and Manipur, over half of the population consume areca  
53  
54  
55  
56  
57  
58  
59

1  
2  
3 nut. Further, Karnataka, Uttar Pradesh, Tamil Nadu, Maharashtra and Odisha, constitute nearly  
4  
5 55% of the country's areca nut users. As far as other SES determinants are concerned, the  
6  
7 findings confirmed age, gender, marital status, education, occupation, social group and religion  
8  
9 are significantly associated with areca nut use. However, the direction of association differs with  
10  
11 respect to areca nut use with and without tobacco.  
12  
13

14  
15 We found protective effect of secondary and above level education in the case of areca nut use  
16  
17 with tobacco and in both forms. A study from Pakistan also observed that the use of areca nut  
18  
19 users increased by grade among school children aged 4 to 16 years [18]. Areca nut use were  
20  
21 higher among male than among female, a finding that is consistent with other studies conducted  
22  
23 in Tamil Nadu and Assam in India [17,23] and elsewhere [11]. However, finding also showed  
24  
25 that in 11 states, areca nut use was higher among women as compared to men. The age-wise  
26  
27 pattern suggests that areca nut use without tobacco began to decline from age 51 onwards. But in  
28  
29 the case of areca nut consumption with tobacco and in both forms, it increased with age. People  
30  
31 in more advanced ages who consume areca nut with tobacco were highly addicted and less aware  
32  
33 about the cessation methods.  
34  
35  
36

37  
38 Similar to other studies from India and other neighbouring countries [15,24], we also observed  
39  
40 higher use of areca nut with tobacco among daily wage/casual labourers. This study further adds  
41  
42 that areca nut use without tobacco too was largely consumed by daily wage/casual labourers,  
43  
44 followed by non-government sector. Evidences suggests that many misconceptions including  
45  
46 consuming areca nut improves concentration, pleasure, helps in anxiety and muscle relaxation  
47  
48 and suppresses appetite increases the likelihood of consumption among those who are engaged in  
49  
50 casual labour and have long working hours [14,25,26]. We found higher use of areca nut among  
51  
52 STs and SCs than other caste groups. Further, Muslims were more likely to consume all three  
53  
54  
55  
56  
57  
58  
59



1  
2  
3 forms of areca nut as compared with Hindus. Previous studies documented higher use of tobacco  
4 including SLT, among SCs/STs and Muslims [16,27].  
5  
6

7  
8 State-wise urban-rural differences suggest that in 18 states, areca nut use was higher in urban  
9 areas than in rural areas. Regression results also revealed higher use areca nut without tobacco in  
10 urban areas than rural counterparts. Studies from India and Pakistan documented that *pan masala*  
11 and *gutka* are very popular even in urban areas due to aggressive advertising, targeting middle  
12 class and adolescents, which improved sale many tobacco and related products including areca  
13 nut [28].  
14  
15  
16  
17  
18  
19  
20  
21

22  
23 Our study had some limitations. Information related to areca nut use in different forms in the  
24 GATS was based on respondents self-reporting. Thus, the study cannot rule out social  
25 desirability bias – a tendency among some people to respond to questions in a way which they  
26 deem to be more acceptable than would be their ‘correct’ answer [29]. Considering the cross-  
27 sectional design of the survey, we did not examine the cause and effect relationship between  
28 socioeconomic characteristics and areca nut use. Similarly, the available data did not allow us to  
29 estimate trends of areca nut usage over time, but future analyses of repeated GATS may inform  
30 on important trends. Another limitation is that the study is based on 15 years and older  
31 population, whereas the areca nut habits often start at younger age. The future Global Youth  
32 Tobacco Survey (GYTS) should have areca nut related questions similar to GATS so that  
33 detailed usage pattern of areca nut could be examined among younger population of the country.  
34  
35  
36  
37  
38  
39  
40  
41  
42  
43  
44  
45  
46  
47

## 48 **Conclusion**

49  
50  
51 It is now well established that areca nut use in any form is highly addictive, a well known risk  
52 factor for oral, pharynx and oesophageal cancers and is associated with many adverse health  
53 effects. This study adds to the existing knowledge that areca nut consumption in India was much  
54  
55  
56  
57  
58  
59  
60

1  
2  
3 higher than the overall smokeless tobacco. Moreover, a significant proportion of areca nut was  
4 consumed along with tobacco, which elevates the adverse health impacts and co-morbidities  
5 further. Thus, it calls for urgent policy intervention to prevent both new generations from taking  
6 up areca nut use habit and helping current users to quit. Such policy efforts to control areca nut  
7 use should be guided by the huge differences in its use across states, gender and socioeconomic  
8 groups in the country. Unlike tobacco, for which the WHO FCTC provides evidence-based  
9 policies, no global policy exists for the regulation and control of areca nut use and its cessation.  
10 Also, there is a need for further research and population-based interventions to find treatment for  
11 areca nut dependence. In addition, research is needed to examine the intention to quit among  
12 areca nut users, separately for all three categories - those who use areca nut with tobacco,  
13 without tobacco and those who use both forms, to develop an appropriate intervention model for  
14 cessation. This information may be collected within the GATS survey by adding a few additional  
15 questions on areca nut for future analysis. Given that areca nut use follows a complex pattern by  
16 SES and regional trajectories, separately for with and without tobacco, future research is needed  
17 to explore the various intersections between SES and areca nut use in different regions of India  
18 to gain better clarity.  
19  
20  
21  
22  
23  
24  
25  
26  
27  
28  
29  
30  
31  
32  
33  
34  
35  
36  
37  
38  
39

#### 40 **Funding**

41 Indian Council of Medical Research, New Delhi.  
42  
43  
44  
45

#### 46 **Declaration of Interests**

47 None declared.  
48  
49  
50  
51  
52  
53  
54  
55  
56  
57  
58  
59  
60

## Reference

- 1 Gupta PC, Ray CS, Papke RL, *et al.* Perspectives on areca nut with some global implications: Symposium report. *Transl Res Oral Oncol* 2018;**3**:2057178X18814068.
- 2 Warnakulasuriya S, Peters TJ. Introduction: Biology, medical and socio-economic aspects of areca nut use. *Addict Biol* 2002;**7**:75–6.
- 3 Mehrtash H, Duncan K, Parascandola M, *et al.* Defining a global research and policy agenda for betel quid and areca nut. *Lancet Oncol* 2017;**18**:e767–75.
- 4 WHO, IARC Working Group on the Evaluation of Carcinogenic Risks, Cancer IA for R on. *Betel-quid and areca-nut chewing and some areca-nut-derived nitrosamines*. IARC 2004.
- 5 Guha N, Warnakulasuriya S, Vlaanderen J, *et al.* Betel quid chewing and the risk of oral and oropharyngeal cancers: A meta-analysis with implications for cancer control. *Int J cancer* 2014;**135**:1433–43.
- 6 Garg A, Chaturvedi P, Gupta PC. A review of the systemic adverse effects of areca nut or betel nut. *Indian J Med Paediatr Oncol Off J Indian Soc Med Paediatr Oncol* 2014;**35**:3.
- 7 Mirza SS, Shafique K, Vart P, *et al.* Areca nut chewing and dependency syndrome: is the dependence comparable to smoking? A cross sectional study. *Subst Abuse Treat Prev Policy* 2011;**6**:23.
- 8 Papke RL, Horenstein NA, Stokes C. Nicotinic activity of arecoline, the psychoactive element of "Betel Nuts", suggests a basis for habitual use and anti-inflammatory activity. *PLoS One* 2015;**10**:e0140907.
- 9 Chandra PS, Mulla U. Areca nut: the hidden Indian 'gateway' to future tobacco use and

- 1  
2  
3 oral cancers among youth. *Indian J Med Sci* 2007;**61**:319–21.  
4  
5  
6 10 Mehrotra R, Yadav A, Sinha DN, *et al.* Smokeless tobacco control in 180 countries across  
7  
8 the globe: call to action for full implementation of WHO FCTC measures. *Lancet Oncol*  
9  
10 2019;**20**:e208–17.  
11  
12  
13 11 Gupta PC, Warnakulasuriya S. Global epidemiology of areca nut usage. *Addict Biol*  
14  
15 2002;**7**:77–83.  
16  
17  
18 12 TISS, MoHFW. Global Adult Tobacco Survey GATS 2 India 2016-17. New Delhi, India:  
19  
20 2017.  
21  
22  
23 13 Tata Institute of Social Sciences and Ministry of Health and Family Welfare Government  
24  
25 of India. Global Adult Tobacco Survey GATS 2 India 2016-2017 Report. 2017.  
26  
27 [https://untobaccocontrol.org/kh/smokeless-tobacco/wp-](https://untobaccocontrol.org/kh/smokeless-tobacco/wp-content/uploads/sites/6/2018/06/GATS_.pdf)  
28  
29 [content/uploads/sites/6/2018/06/GATS\\_.pdf](https://untobaccocontrol.org/kh/smokeless-tobacco/wp-content/uploads/sites/6/2018/06/GATS_.pdf)  
30  
31  
32  
33 14 Ansari ZA, Bano SN, Zulkifle M. Prevalence of tobacco use among power loom workers-  
34  
35 A cross-sectional study. *Indian J community Med Off Publ Indian Assoc Prev Soc Med*  
36  
37 2010;**35**:34.  
38  
39  
40  
41 15 Bandyopadhyay A, Irfan M. Educational and Wealth Inequalities in Smokeless Tobacco  
42  
43 Use: An Analysis of Rural-Urban Areas of Bangladesh and India. *Subst Abus Res Treat*  
44  
45 2019;**13**:1178221818825074.  
46  
47  
48 16 Bhan N, Karan A, Srivastava S, *et al.* Have socioeconomic inequalities in Tobacco use in  
49  
50 India increased over time? Trends from the national sample surveys (2000–2012).  
51  
52 *Nicotine Tob Res* 2016;**18**:1711–8.  
53  
54  
55 17 Rajan G, Ramesh S, Sankaralingam S. Areca nut use in rural Tamil Nadu: A growing  
56  
57  
58  
59  
60

- 1  
2  
3 threat. *Indian J Med Sci* 2007;**61**:332–7.  
4  
5  
6 18 Shah SMA, Merchant AT, Luby SP, *et al*. Addicted schoolchildren: Prevalence and  
7 characteristics of areca nut chewers among primary school children in Karachi, Pakistan. *J*  
8  
9  
10  
11 *Paediatr Child Health* 2002;**38**:507–10.  
12  
13  
14 19 Rutstein SO, Staveteig S. Making the demographic and health surveys wealth index  
15 comparable. 2014.  
16  
17  
18 20 Scott Long J. Regression models for categorical and limited dependent variables. *Adv*  
19  
20  
21 *Quant Tech Soc Sci* 1997;**7**.  
22  
23  
24 21 Haan P, Uhlenborff A. Estimation of multinomial logit models with unobserved  
25 heterogeneity using maximum simulated likelihood. DIW Discussion Papers 2006.  
26  
27  
28  
29 22 Stata S. Release 13. Statistical software. *StataCorp LP, Coll Station TX* 2013.  
30  
31  
32 23 Mahanta B, Phukan N, Mohapatra PK, *et al*. Betel Nut Chewing Habit and Its  
33 Determinants among Adolescent Boys and Girls in an Industrial Town of Assam, India.  
34  
35  
36  
37 24 Hashibe M, Jacob BJ, Thomas G, *et al*. Socioeconomic status, lifestyle factors and oral  
38 premalignant lesions. *Oral Oncol* 2003;**39**:664–71.  
39  
40  
41  
42 25 Gunaseelan R, Shanthi S, Sowmya R, *et al*. Areca nut use among rural residents of  
43 Sriperambudur Taluk: A qualitative study. *Indian J Dent Res* 2007;**18**:11.  
44  
45  
46  
47 26 Thankappan KR, Thresia CU. Tobacco use & social status in Kerala. *Indian J Med Res*  
48  
49  
50  
51  
52 27 Rani M, Bonu S, Jha P, *et al*. Tobacco use in India: prevalence and predictors of smoking  
53 and chewing in a national cross sectional household survey. *Tob Control* 2003;**12**:e4–e4.  
54  
55  
56  
57  
58  
59  
60

- 1  
2  
3 28 Gupta PC, RAY CS. Tobacco and youth in the South East Asian region. *Indian J Cancer*  
4 2002;**39**:5–34.  
5  
6  
7  
8 29 Fisher RJ. Social desirability bias and the validity of indirect questioning. *J Consum Res*  
9 1993;**20**:303–15.  
10  
11  
12  
13  
14  
15  
16  
17  
18  
19  
20  
21  
22  
23  
24  
25  
26  
27  
28  
29  
30  
31  
32  
33  
34  
35  
36  
37  
38  
39  
40  
41  
42  
43  
44  
45  
46  
47  
48  
49  
50  
51  
52  
53  
54  
55  
56  
57  
58  
59  
60

**Table 1.** Prevalence (in %) and Number of Users of Different Types of Areca Nut in India, GATS 2016-17

| Tobacco Products                                              | Total          |                | Men              |                | Women          |                | Urban          |                | Rural          |                |
|---------------------------------------------------------------|----------------|----------------|------------------|----------------|----------------|----------------|----------------|----------------|----------------|----------------|
|                                                               | % (95%CI)      | Users (in 000) | % (95%CI)        | Users (in 000) | % (95%CI)      | Users (in 000) | % (95%CI)      | Users (in 000) | % (95%CI)      | Users (in 000) |
| <i>Pan masala</i> without tobacco                             | 4.8 (3.2-5.6)  | 44759          | 6.2 (4.1-8.3)    | 57814          | 3.2 (1.9-5.1)  | 2984           | 5.2 (3.1-7.7)  | 4848           | 4.5 (2.2-6.8)  | 41962          |
| <i>Pan masala</i> with Tobacco                                | 2.8 (1.6-3.8)  | 26110          | 4.5 (2.8-5.7)    | 41962          | 1.1 (0.6-2.1)  | 1025           | 2.3 (1.1-3.8)  | 2144           | 3.1 (1.2-5.2)  | 28907          |
| Betel Quid without Tobacco                                    | 8.7 (6.7-10.2) | 81126          | 8.4 (5.9-10.8)   | 78329          | 9.0 (6.1-11.9) | 8392           | 9.1 (6.8-12.6) | 8485           | 8.4 (5.7-10.8) | 78329          |
| Betel Quid with Tobacco                                       | 5.8 (3.8-7.2)  | 54084          | 7.1 (5.2-9.3)    | 66207          | 5.5 (3.2-7.8)  | 5128           | 4.3 (2.8-6.3)  | 4009           | 6.6 (4.2-8.3)  | 61544          |
| Areca Nut of Any Type                                         | 8.0 (5.9-10.3) | 74599          | 8.3 (5.8-11.2)   | 77397          | 7.7 (5.1-9.2)  | 7180           | 9.1 (6.5-13.1) | 8485           | 7.5 (4.8-9.8)  | 69937          |
| <i>Gutka</i> , Areca Nut-Tobacco Lime Mixture, or <i>Mawa</i> | 6.8 (5.7-8.6)  | 63409          | 17.8 (15.1-20.2) | 100709         | 2.7 (1.2-4.1)  | 2517           | 6.3 (3.1-8.7)  | 5874           | 7.1 (4.5-9.8)  | 66207          |

**Table 2.** Prevalence (in %) of Areca Nut Use in Different Forms across States & Union Territories of India, GATS 2016-17

| States/UTs              | Areca nut use without tobacco only |             | Areca nut use with tobacco only |             | Both Forms |             | Any Form |             |
|-------------------------|------------------------------------|-------------|---------------------------------|-------------|------------|-------------|----------|-------------|
| <b>North region</b>     |                                    |             |                                 |             |            |             |          |             |
| Jammu & Kashmir         | 0.5                                | [0.2,1.2]   | 0.9                             | [0.5,1.5]   | 0.0        | [0.0,0.1]   | 1.4      | [0.8,2.1]   |
| Himachal Pradesh        | 1.2                                | [0.8,1.9]   | 0.3                             | [0.1,0.8]   | 0.0        | [0.0,0.2]   | 1.5      | [1.1,2.3]   |
| Punjab                  | 1.0                                | [0.6,1.6]   | 2.0                             | [0.9,4.2]   | 0.1        | [0.0,0.6]   | 3.1      | [1.8,5.2]   |
| Chandigarh              | 1.7                                | [1.1,2.7]   | 1.6                             | [0.9,3.0]   | 0.1        | [0.0,0.3]   | 3.4      | [2.3,5.1]   |
| Uttarakhand             | 17.5                               | [14.0,21.6] | 3.8                             | [2.9,4.8]   | 1.3        | [0.7,2.1]   | 22.6     | [18.5,27.1] |
| Haryana                 | 2.6                                | [1.7,4.0]   | 2.4                             | [1.0,5.3]   | 0.2        | [0.1,0.6]   | 5.2      | [3.3,8.1]   |
| Delhi                   | 15.7                               | [13.0,18.7] | 2.0                             | [1.3,2.9]   | 1.0        | [0.6,1.7]   | 18.7     | [15.6,22.0] |
| <b>Central region</b>   |                                    |             |                                 |             |            |             |          |             |
| Rajasthan               | 7.5                                | [6.3,9.1]   | 6.5                             | [5.3,7.9]   | 1.4        | [0.7,2.5]   | 15.4     | [13.4,17.6] |
| Uttar Pradesh           | 18.3                               | [16.4,20.3] | 12.4                            | [11.0,14.0] | 3.5        | [2.7,4.4]   | 34.2     | [31.9,36.5] |
| Chhattisgarh            | 8.4                                | [6.4,10.8]  | 7.4                             | [5.9,9.3]   | 1.2        | [0.7,1.8]   | 17.0     | [14.2,20.1] |
| Madhya Pradesh          | 8.6                                | [7.2,10.2]  | 13.4                            | [11.3,15.9] | 2.1        | [1.4,3.0]   | 24.1     | [21.2,27.2] |
| <b>East region</b>      |                                    |             |                                 |             |            |             |          |             |
| West Bengal             | 13.4                               | [10.7,16.7] | 4.1                             | [3.0,5.5]   | 3.7        | [2.8,5.0]   | 21.2     | [18.2,24.6] |
| Jharkhand               | 8.3                                | [6.6,10.3]  | 8.2                             | [6.4,10.5]  | 1.1        | [0.6,2.0]   | 17.6     | [14.3,21.4] |
| Odisha                  | 11.3                               | [8.6,14.6]  | 11.5                            | [9.6,13.8]  | 4.8        | [3.4,6.6]   | 27.6     | [23.1,32.6] |
| Bihar                   | 7.0                                | [5.4,9.1]   | 5.0                             | [4.0,6.3]   | 0.5        | [0.3,0.9]   | 12.5     | [10.5,14.8] |
| <b>Northeast region</b> |                                    |             |                                 |             |            |             |          |             |
| Sikkim                  | 11.5                               | [8.9,14.9]  | 1.5                             | [0.9,2.6]   | 0.7        | [0.4,1.2]   | 13.7     | [10.8,17.4] |
| Arunachal Pradesh       | 17.4                               | [14.4,20.8] | 18.6                            | [13.0,25.8] | 3.7        | [2.6,5.2]   | 39.7     | [32.6,47.0] |
| Nagaland                | 9.6                                | [7.6,12.2]  | 15.1                            | [12.7,17.8] | 5.8        | [4.3,7.8]   | 30.5     | [27.3,34.0] |
| Manipur                 | 23.7                               | [20.2,27.5] | 21.0                            | [18.3,24.0] | 6.0        | [4.6,7.8]   | 50.7     | [47.0,54.4] |
| Mizoram                 | 52.9                               | [48.3,57.5] | 0.8                             | [0.4,1.7]   | 4.4        | [3.2,5.9]   | 58.1     | [53.0,62.9] |
| Tripura                 | 14.3                               | [11.6,17.4] | 17.0                            | [14.0,20.6] | 14.0       | [11.0,17.7] | 45.3     | [42.0,48.7] |
| Meghalaya               | 63.2                               | [57.5,68.5] | 1.6                             | [0.9,2.8]   | 6.0        | [4.3,8.2]   | 70.8     | [65.4,75.5] |
| Assam                   | 45.6                               | [42.8,48.4] | 11.4                            | [9.9,13.2]  | 10.6       | [9.2,12.2]  | 67.6     | [64.7,70.5] |
| <b>West region</b>      |                                    |             |                                 |             |            |             |          |             |
| Gujarat                 | 8.3                                | [6.5,10.5]  | 11.1                            | [8.8,13.9]  | 1.1        | [0.8,1.7]   | 20.5     | [17.8,23.5] |
| Maharashtra             | 19.6                               | [17.0,22.5] | 6.9                             | [5.5,8.8]   | 2.9        | [2.0,4.2]   | 29.4     | [25.3,34.0] |
| Goa                     | 17.3                               | [14.6,20.4] | 1.3                             | [0.7,2.2]   | 1.1        | [0.7,1.9]   | 19.7     | [16.7,23.1] |
| <b>South region</b>     |                                    |             |                                 |             |            |             |          |             |
| Andhra Pradesh          | 6.7                                | [5.2,8.7]   | 1.3                             | [0.7,2.4]   | 1.2        | [0.6,2.4]   | 9.2      | [7.1,11.7]  |
| Telangana               | 8.7                                | [6.9,11.0]  | 2.8                             | [1.8,4.3]   | 2.0        | [1.2,3.3]   | 13.5     | [11.3,16.2] |
| Karnataka               | 28.8                               | [25.6,32.1] | 7.7                             | [6.2,9.4]   | 4.3        | [3.4,5.3]   | 40.8     | [36.3,45.2] |
| Kerala                  | 3.1                                | [2.2,4.3]   | 2.6                             | [1.9,3.6]   | 0.4        | [0.2,1.0]   | 6.1      | [4.7,7.9]   |
| Tamil Nadu              | 25.5                               | [21.9,29.5] | 3.7                             | [2.5,5.6]   | 1.2        | [0.8,1.7]   | 30.4     | [27.1,34.0] |



|              |             |                    |            |                  |            |                  |             |                    |
|--------------|-------------|--------------------|------------|------------------|------------|------------------|-------------|--------------------|
| Puducherry   | 17.7        | [14.7,21.1]        | 1.9        | [1.0,3.4]        | 1.4        | [0.9,2.1]        | 21.0        | [17.6,24.9]        |
| <b>India</b> | <b>14.2</b> | <b>[13.6,14.9]</b> | <b>7.3</b> | <b>[6.9,7.7]</b> | <b>2.4</b> | <b>[2.2,2.7]</b> | <b>23.9</b> | <b>[23.1,24.8]</b> |

**Table 3.** Population and Share of Areca Nut Use by States & Union Territories of India, GATS 2016-17

| States/UTs        | Population          | Share (in%)  |
|-------------------|---------------------|--------------|
| Chandigarh        | 33,040              | 0.0          |
| Sikkim            | 68,448              | 0.0          |
| Himachal Pradesh  | 88,112              | 0.0          |
| Jammu & Kashmir   | 1,21,264            | 0.1          |
| Puducherry        | 2,11,680            | 0.1          |
| Goa               | 2,37,779            | 0.1          |
| Arunachal Pradesh | 4,15,800            | 0.2          |
| Nagaland          | 4,59,940            | 0.2          |
| Mizoram           | 4,88,040            | 0.2          |
| Punjab            | 6,99,081            | 0.3          |
| Haryana           | 10,48,632           | 0.5          |
| Manipur           | 11,31,624           | 0.5          |
| Tripura           | 13,16,418           | 0.6          |
| Meghalaya         | 14,93,184           | 0.7          |
| Kerala            | 16,50,843           | 0.7          |
| Uttarakhand       | 17,56,575           | 0.8          |
| Delhi             | 27,61,914           | 1.2          |
| Chhattisgarh      | 32,62,714           | 1.5          |
| Andhra Pradesh    | 36,54,056           | 1.6          |
| Telangana         | 38,09,088           | 1.7          |
| Jharkhand         | 42,61,840           | 1.9          |
| Rajasthan         | 79,00,200           | 3.5          |
| Odisha            | 89,84,904           | 4.0          |
| Bihar             | 90,95,000           | 4.1          |
| Gujarat           | 98,13,760           | 4.4          |
| Madhya Pradesh    | 1,31,45,827         | 5.9          |
| West Bengal       | 1,54,75,728         | 6.9          |
| Assam             | 1,58,33,272         | 7.1          |
| Tamil Nadu        | 1,77,53,296         | 7.9          |
| Karnataka         | 1,98,34,738         | 8.9          |
| Maharashtra       | 2,67,53,412         | 12.0         |
| Uttar Pradesh     | 4,99,32,289         | 22.3         |
| <b>India</b>      | <b>22,37,97,120</b> | <b>100.0</b> |

**Table 4.** Areca Nut Use Pattern by Demographic and Socioeconomic Characteristics, GATS 2016-17

| Background Variables                                 | Areca nut use without tobacco only |             | Areca nut use with tobacco only |             | Both Forms |           | Any Forms |             |
|------------------------------------------------------|------------------------------------|-------------|---------------------------------|-------------|------------|-----------|-----------|-------------|
|                                                      | %                                  | 95%CI       | %                               | 95%CI       | %          | 95%CI     | %         | 95%CI       |
| <b>Age</b>                                           |                                    |             |                                 |             |            |           |           |             |
| 15-18                                                | 15.7                               | [13.9,17.6] | 1.9                             | [1.4,2.5]   | 0.7        | [0.5,1.2] | 18.3      | [16.5,20.3] |
| 19-23                                                | 14.8                               | [13.3,16.4] | 5.4                             | [4.5,6.4]   | 1.3        | [0.9,1.9] | 21.5      | [19.8,23.3] |
| 24-30                                                | 14.1                               | [13.1,15.2] | 8.2                             | [7.3,9.1]   | 2.4        | [2.0,2.9] | 24.7      | [23.3,26.1] |
| 31-40                                                | 14.6                               | [13.6,15.6] | 9.3                             | [8.6,10.1]  | 2.7        | [2.4,3.2] | 26.7      | [25.4,28.0] |
| 41-50                                                | 15.2                               | [14.1,16.3] | 8.1                             | [7.3,9.0]   | 3.1        | [2.6,3.7] | 26.4      | [25.0,27.9] |
| 51-60                                                | 13.5                               | [12.2,14.8] | 8                               | [7.0,9.0]   | 3.2        | [2.6,3.9] | 24.6      | [23.1,26.3] |
| 60+                                                  | 11.1                               | [9.9,12.3]  | 7.8                             | [6.6,9.0]   | 3.2        | [2.6,4.0] | 22.0      | [20.2,23.9] |
| <b>Sex</b>                                           |                                    |             |                                 |             |            |           |           |             |
| Female                                               | 13.2                               | [12.5,14.0] | 3.4                             | [3.0,3.8]   | 2.3        | [2.0,2.6] | 18.9      | [18.0,19.9] |
| Male                                                 | 15.2                               | [14.4,16.1] | 11                              | [10.4,11.8] | 2.6        | [2.3,2.9] | 28.8      | [27.7,30.0] |
| <b>Marital Status</b>                                |                                    |             |                                 |             |            |           |           |             |
| Married                                              | 13.7                               | [13.1,14.4] | 8.1                             | [7.6,8.6]   | 2.7        | [2.4,3.0] | 24.5      | [23.6,25.4] |
| Unmarried                                            | 15.8                               | [14.6,17.1] | 4.6                             | [3.9,5.3]   | 1          | [0.8,1.4] | 21.4      | [20.0,22.9] |
| Widowed/Separated/Divorced                           | 14.3                               | [12.8,15.9] | 8.3                             | [7.1,9.7]   | 4.5        | [3.7,5.5] | 27.1      | [25.3,29.1] |
| <b>Education</b>                                     |                                    |             |                                 |             |            |           |           |             |
| No formal Education                                  | 11.2                               | [10.3,12.1] | 8.7                             | [8.0,9.6]   | 3.7        | [3.2,4.2] | 23.6      | [22.4,25.0] |
| <Primary completed                                   | 14.7                               | [13.4,16.1] | 9.7                             | [8.6,10.9]  | 2.9        | [2.4,3.6] | 27.4      | [25.6,29.2] |
| Primary completed                                    | 15.4                               | [14.1,16.9] | 10.0                            | [8.9,11.2]  | 2.5        | [2.0,3.0] | 27.9      | [26.2,29.7] |
| <Secondary completed                                 | 16                                 | [14.7,17.3] | 8.5                             | [7.6,9.5]   | 2.4        | [1.9,2.9] | 26.8      | [25.3,28.3] |
| Secondary completed                                  | 15.1                               | [13.8,16.5] | 5.1                             | [4.4,5.8]   | 1.7        | [1.3,2.4] | 21.9      | [20.5,23.5] |
| Higher Secondary completed                           | 15.6                               | [14.0,17.3] | 4.4                             | [3.6,5.3]   | 1.4        | [0.9,2.1] | 21.4      | [19.7,23.3] |
| College/University completed                         | 15.5                               | [13.9,17.3] | 3.0                             | [2.3,3.8]   | 1.1        | [0.7,1.7] | 19.6      | [17.8,21.5] |
| Post-graduate completed                              | 12.8                               | [10.7,15.2] | 2.8                             | [1.6,4.6]   | 0.9        | [0.4,2.4] | 16.5      | [14.0,19.3] |
| <b>Occupation</b>                                    |                                    |             |                                 |             |            |           |           |             |
| Student                                              | 14.8                               | [13.2,16.6] | 0.8                             | [0.5,1.2]   | 0.3        | [0.2,0.6] | 15.8      | [14.2,17.6] |
| Government Employee                                  | 17.4                               | [14.9,20.3] | 6.7                             | [5.1,8.8]   | 1.9        | [1.1,3.4] | 26.1      | [23.2,29.2] |
| Non-government Employee                              | 16.9                               | [15.3,18.6] | 10.4                            | [8.7,12.3]  | 2.7        | [2.0,3.8] | 30.0      | [27.7,32.5] |
| Daily Wage/Casual Labourer                           | 15.3                               | [14.2,16.5] | 11.4                            | [10.4,12.4] | 3.5        | [3.0,4.1] | 30.2      | [28.7,31.7] |
| Self-employed                                        | 14.9                               | [13.8,16.2] | 11.7                            | [10.7,12.7] | 3.1        | [2.7,3.7] | 29.7      | [28.2,31.4] |
| Homemaker                                            | 12.4                               | [11.6,13.3] | 3.5                             | [3.1,4.1]   | 1.9        | [1.6,2.3] | 17.9      | [16.9,18.9] |
| Retired                                              | 9.1                                | [7.2,11.6]  | 6.3                             | [4.1,9.5]   | 2.6        | [1.2,5.7] | 18.0      | [14.7,22.0] |
| Unemployed able to work                              | 14.6                               | [11.9,17.8] | 6.5                             | [4.6,9.2]   | 2.8        | [1.7,4.6] | 23.9      | [20.3,28.0] |
| Unemployed unable to work                            | 10.7                               | [8.5,13.2]  | 7                               | [5.2,9.4]   | 3.4        | [2.1,5.4] | 21.1      | [18.2,24.4] |
| <b>Knowledge of Adverse Health Impact of SLT Use</b> |                                    |             |                                 |             |            |           |           |             |
| No                                                   | 11.5                               | [8.3,15.7]  | 7.7                             | [5.6,10.4]  | 3.7        | [2.2,6.1] | 22.9      | [18.6,27.8] |
| Partial                                              | 15.2                               | [14.1,16.3] | 9                               | [8.2,9.9]   | 3.4        | [2.9,3.9] | 27.5      | [26.1,29.0] |
| Full                                                 | 14                                 | [13.4,14.8] | 6.8                             | [6.4,7.3]   | 2.2        | [2.0,2.4] | 23.1      | [22.2,24.0] |
| <b>Caste</b>                                         |                                    |             |                                 |             |            |           |           |             |

1  
2  
3  
4  
5  
6  
7  
8  
9  
10  
11  
12  
13  
14  
15  
16  
17  
18  
19  
20  
21  
22  
23  
24  
25  
26  
27  
28  
29  
30  
31  
32  
33  
34  
35  
36  
37  
38  
39  
40  
41  
42  
43  
44  
45  
46  
47  
48  
49  
50  
51  
52  
53  
54  
55  
56  
57  
58  
59  
60

|                           |      |             |      |             |     |            |      |             |
|---------------------------|------|-------------|------|-------------|-----|------------|------|-------------|
| Others                    | 14.2 | [13.2,15.2] | 6.1  | [5.5,6.9]   | 2.6 | [2.2,3.0]  | 22.9 | [21.6,24.3] |
| Scheduled Castes          | 12.3 | [11.1,13.5] | 8.4  | [7.5,9.3]   | 2.6 | [2.2,3.0]  | 23.2 | [21.8,24.6] |
| Scheduled Tribes          | 14.3 | [12.7,16.0] | 8.5  | [7.2,9.5]   | 2.8 | [2.1,3.3]  | 25.6 | [23.0,27.5] |
| Oother Backward Castes    | 15.1 | [14.2,16.1] | 7.3  | [6.8,7.9]   | 2.3 | [2.0,2.6]  | 24.7 | [23.5,25.9] |
| <b>Religion</b>           |      |             |      |             |     |            |      |             |
| Hindu                     | 13.6 | [12.9,14.3] | 7.3  | [6.9,7.8]   | 2.3 | [2.1,2.6]  | 23.2 | [22.3,24.1] |
| Muslim                    | 19   | [17.2,20.9] | 8.5  | [7.3,9.9]   | 3.3 | [2.8,4.0]  | 30.8 | [28.4,33.2] |
| Christian                 | 16.2 | [13.6,19.1] | 3.5  | [2.8,4.4]   | 2.3 | [1.4,3.7]  | 21.9 | [18.9,25.3] |
| Others                    | 8.4  | [6.5,10.7]  | 4.1  | [2.7,6.0]   | 1.7 | [1.0,3.1]  | 14.1 | [11.4,17.4] |
| <b>Wealth Quintile</b>    |      |             |      |             |     |            |      |             |
| Poorest                   | 12.1 | [11.1,13.1] | 9.6  | [8.8,10.4]  | 3.1 | [2.7,3.6]  | 24.7 | [23.4,26.2] |
| Poorer                    | 13.7 | [12.8,14.8] | 8.6  | [7.8,9.4]   | 2.9 | [2.5,3.4]  | 25.2 | [23.9,26.6] |
| Middle                    | 14.6 | [13.5,15.8] | 8.2  | [7.3,9.2]   | 2.4 | [1.9,2.9]  | 25.2 | [23.7,26.8] |
| Richer                    | 16.1 | [14.8,17.5] | 5.4  | [4.7,6.1]   | 2.0 | [1.5,2.6]  | 23.4 | [21.9,25.0] |
| Richest                   | 15.7 | [14.3,17.3] | 2.7  | [2.2,3.3]   | 1.1 | [0.8,1.6]  | 19.5 | [18.0,21.1] |
| <b>Place of Residence</b> |      |             |      |             |     |            |      |             |
| Urban                     | 15.7 | [14.6,16.9] | 6.1  | [5.4,6.8]   | 2.0 | [1.7,2.4]  | 23.8 | [22.3,25.4] |
| Rural                     | 13.5 | [12.7,14.2] | 7.9  | [7.4,8.5]   | 2.7 | [2.4,3.0]  | 24.1 | [23.1,25.0] |
| <b>Region</b>             |      |             |      |             |     |            |      |             |
| North                     | 5.6  | [4.9,6.4]   | 2.0  | [1.4,2.8]   | 0.4 | [0.3,0.6]  | 8.0  | [7.0,9.1]   |
| Central                   | 13.6 | [12.5,14.8] | 11.1 | [10.2,12.1] | 2.6 | [2.2,3.2]  | 27.3 | [25.9,28.8] |
| East                      | 10.1 | [8.9,11.6]  | 6.1  | [5.4,6.9]   | 2.4 | [2.0,3.0]  | 18.7 | [17.1,20.4] |
| Northeast                 | 39.9 | [37.8,42.0] | 11.9 | [10.8,13.2] | 9.6 | [8.6,10.7] | 61.4 | [59.3,63.5] |
| West                      | 15.7 | [13.8,17.8] | 8.3  | [7.0,9.8]   | 2.3 | [1.6,3.2]  | 26.3 | [23.3,29.5] |
| South                     | 17.3 | [15.8,18.8] | 3.9  | [3.3,4.6]   | 1.9 | [1.6,2.3]  | 23.1 | [21.4,24.9] |

---

*Chi<sup>2</sup> p-value <0.001*

**Table 5.** Multinomial Regression Analysis showing Determinants of Areca Nut Use, India GATS 2016-17

| Background Variables                                 | Areca nut use without tobacco only |         |       |      | Areca nut use with tobacco only |         |       |      | Both Forms |         |       |      |
|------------------------------------------------------|------------------------------------|---------|-------|------|---------------------------------|---------|-------|------|------------|---------|-------|------|
|                                                      | RRR                                | p-value | 95%CI |      | RRR                             | p-value | 95%CI |      | RRR        | p-value | 95%CI |      |
| <b>Age</b>                                           |                                    |         |       |      |                                 |         |       |      |            |         |       |      |
| 15-18 (ref.)                                         | 1.00                               |         |       |      | 1.00                            |         |       |      | 1.00       |         |       |      |
| 19-23                                                | 0.91                               | 0.106   | 0.81  | 1.02 | 1.73                            | <0.001  | 1.33  | 2.25 | 1.53       | 0.034   | 1.03  | 2.26 |
| 24-30                                                | 0.92                               | 0.202   | 0.81  | 1.04 | 2.37                            | <0.001  | 1.83  | 3.08 | 2.26       | <0.001  | 1.54  | 3.33 |
| 31-40                                                | 0.92                               | 0.191   | 0.81  | 1.04 | 2.71                            | <0.001  | 2.08  | 3.52 | 2.72       | <0.001  | 1.84  | 4.03 |
| 41-50                                                | 0.91                               | 0.159   | 0.80  | 1.04 | 2.42                            | <0.001  | 1.85  | 3.16 | 2.59       | <0.001  | 1.74  | 3.86 |
| 51-60                                                | 0.77                               | <0.001  | 0.67  | 0.89 | 2.14                            | <0.001  | 1.62  | 2.81 | 2.53       | <0.001  | 1.68  | 3.80 |
| 60+                                                  | 0.65                               | <0.001  | 0.56  | 0.75 | 2.04                            | <0.001  | 1.54  | 2.70 | 2.36       | <0.001  | 1.55  | 3.58 |
| <b>Sex</b>                                           |                                    |         |       |      |                                 |         |       |      |            |         |       |      |
| Female (ref.)                                        | 1.00                               |         |       |      | 1.00                            |         |       |      | 1.00       |         |       |      |
| Male                                                 | 1.13                               | <0.001  | 1.07  | 1.20 | 2.02                            | <0.001  | 1.85  | 2.21 | 1.81       | 0.001   | 1.72  | 1.92 |
| <b>Marital Status</b>                                |                                    |         |       |      |                                 |         |       |      |            |         |       |      |
| Married (ref.)                                       | 1.00                               |         |       |      | 1.00                            |         |       |      | 1.00       |         |       |      |
| Unmarried                                            | 0.94                               | 0.160   | 0.86  | 1.02 | 1.06                            | 0.382   | 0.93  | 1.20 | 1.12       | 0.273   | 0.92  | 1.36 |
| Widowed/Separated/Divorced                           | 1.37                               | <0.001  | 1.24  | 1.50 | 1.62                            | <0.001  | 1.42  | 1.83 | 1.59       | <0.001  | 1.35  | 1.88 |
| <b>Education</b>                                     |                                    |         |       |      |                                 |         |       |      |            |         |       |      |
| No formal Education (ref.)                           | 1.00                               |         |       |      | 1.00                            |         |       |      | 1.00       |         |       |      |
| <Primary completed                                   | 1.23                               | <0.001  | 1.14  | 1.34 | 1.01                            | 0.867   | 0.91  | 1.12 | 0.93       | 0.318   | 0.80  | 1.08 |
| Primary completed                                    | 1.20                               | <0.001  | 1.11  | 1.30 | 1.06                            | 0.264   | 0.96  | 1.17 | 0.82       | 0.016   | 0.70  | 0.96 |
| <Secondary completed                                 | 1.37                               | <0.001  | 1.27  | 1.48 | 0.99                            | 0.774   | 0.89  | 1.09 | 0.90       | 0.177   | 0.77  | 1.05 |
| Secondary completed                                  | 1.23                               | <0.001  | 1.13  | 1.34 | 0.79                            | <0.001  | 0.70  | 0.89 | 0.75       | 0.003   | 0.62  | 0.91 |
| Higher Secondary completed                           | 1.23                               | <0.001  | 1.11  | 1.35 | 0.74                            | <0.001  | 0.64  | 0.86 | 0.74       | 0.011   | 0.59  | 0.93 |
| College/University completed                         | 1.18                               | 0.003   | 1.06  | 1.31 | 0.53                            | <0.001  | 0.44  | 0.63 | 0.53       | <0.001  | 0.40  | 0.71 |
| Post-graduate completed                              | 1.18                               | 0.023   | 1.02  | 1.36 | 0.35                            | <0.001  | 0.25  | 0.48 | 0.43       | <0.001  | 0.27  | 0.68 |
| <b>Occupation</b>                                    |                                    |         |       |      |                                 |         |       |      |            |         |       |      |
| Student (ref.)                                       | 1.00                               |         |       |      | 1.00                            |         |       |      | 1.00       |         |       |      |
| Government Employee                                  | 1.15                               | 0.060   | 0.99  | 1.34 | 3.43                            | <0.001  | 2.49  | 4.73 | 2.56       | <0.001  | 1.63  | 4.00 |
| Non-government Employee                              | 1.59                               | <0.001  | 1.39  | 1.81 | 4.87                            | <0.001  | 3.64  | 6.53 | 4.17       | <0.001  | 2.75  | 6.30 |
| Daily Wage/Casual Labourer                           | 1.65                               | <0.001  | 1.46  | 1.87 | 4.51                            | <0.001  | 3.40  | 5.99 | 3.95       | <0.001  | 2.66  | 5.87 |
| Self-employed                                        | 1.30                               | <0.001  | 1.15  | 1.47 | 4.34                            | <0.001  | 3.27  | 5.75 | 2.87       | <0.001  | 1.94  | 4.27 |
| Homemaker                                            | 1.26                               | <0.001  | 1.11  | 1.42 | 2.61                            | <0.001  | 1.95  | 3.49 | 2.11       | <0.001  | 1.42  | 3.13 |
| Retired                                              | 0.95                               | 0.604   | 0.77  | 1.17 | 2.28                            | <0.001  | 1.56  | 3.33 | 2.21       | 0.004   | 1.29  | 3.77 |
| Unemployed able to work                              | 0.91                               | 0.287   | 0.76  | 1.08 | 2.91                            | <0.001  | 2.09  | 4.05 | 2.04       | 0.003   | 1.28  | 3.25 |
| Unemployed unable to work                            | 1.24                               | 0.039   | 1.01  | 1.52 | 2.56                            | <0.001  | 1.79  | 3.67 | 2.49       | 0.000   | 1.51  | 4.09 |
| <b>Knowledge of Adverse Health Impact of SLT use</b> |                                    |         |       |      |                                 |         |       |      |            |         |       |      |
| No (ref.)                                            | 1.00                               |         |       |      | 1.00                            |         |       |      | 1.00       |         |       |      |
| Partial                                              | 1.37                               | 0.001   | 1.13  | 1.66 | 1.36                            | 0.017   | 1.06  | 1.76 | 1.60       | 0.009   | 1.12  | 2.28 |
| Full                                                 | 1.22                               | 0.056   | 1.01  | 1.48 | 1.04                            | 0.759   | 0.81  | 1.34 | 1.23       | 0.249   | 0.87  | 1.74 |
| <b>Caste</b>                                         |                                    |         |       |      |                                 |         |       |      |            |         |       |      |
| Others (ref.)                                        | 1.00                               |         |       |      | 1.00                            |         |       |      | 1.00       |         |       |      |
| Scheduled Castes                                     | 1.05                               | 0.197   | 0.97  | 1.13 | 1.17                            | 0.004   | 1.05  | 1.29 | 1.25       | 0.005   | 1.07  | 1.46 |

|    |                           |       |        |       |       |       |        |       |       |       |        |       |       |
|----|---------------------------|-------|--------|-------|-------|-------|--------|-------|-------|-------|--------|-------|-------|
| 1  |                           |       |        |       |       |       |        |       |       |       |        |       |       |
| 2  |                           |       |        |       |       |       |        |       |       |       |        |       |       |
| 3  | Scheduled Tribes          | 1.11  | 0.016  | 1.02  | 1.20  | 0.96  | 0.459  | 0.85  | 1.08  | 0.91  | 0.295  | 0.77  | 1.08  |
| 4  | Oother Backward Castes    | 0.95  | 0.087  | 0.89  | 1.01  | 0.96  | 0.346  | 0.88  | 1.05  | 0.80  | 0.001  | 0.70  | 0.92  |
| 5  |                           |       |        |       |       |       |        |       |       |       |        |       |       |
| 6  | <b>Religion</b>           |       |        |       |       |       |        |       |       |       |        |       |       |
| 7  | Hindu (ref.)              | 1.00  |        |       |       | 1.00  |        |       |       | 1.00  |        |       |       |
| 8  | Muslim                    | 1.35  | <0.001 | 1.26  | 1.45  | 1.22  | <0.001 | 1.11  | 1.35  | 1.41  | <0.001 | 1.22  | 1.63  |
| 9  | Christian                 | 0.83  | <0.001 | 0.77  | 0.91  | 0.59  | <0.001 | 0.52  | 0.68  | 0.58  | <0.001 | 0.49  | 0.69  |
| 10 | others                    | 0.61  | <0.001 | 0.55  | 0.68  | 0.50  | <0.001 | 0.42  | 0.60  | 0.36  | <0.001 | 0.27  | 0.47  |
| 11 |                           |       |        |       |       |       |        |       |       |       |        |       |       |
| 12 | <b>Wealth Quintile</b>    |       |        |       |       |       |        |       |       |       |        |       |       |
| 13 | Poorest (ref.)            | 1.00  |        |       |       | 1.00  |        |       |       | 1.00  |        |       |       |
| 14 | Poorer                    | 0.94  | 0.062  | 0.88  | 1.00  | 0.96  | 0.321  | 0.88  | 1.04  | 1.11  | 0.097  | 0.98  | 1.25  |
| 15 | Middle                    | 1.02  | 0.573  | 0.95  | 1.11  | 0.97  | 0.628  | 0.88  | 1.08  | 1.00  | 0.964  | 0.85  | 1.17  |
| 16 | Richer                    | 1.03  | 0.403  | 0.96  | 1.12  | 0.79  | <0.001 | 0.70  | 0.89  | 0.79  | 0.010  | 0.66  | 0.95  |
| 17 | Richest                   | 1.04  | 0.305  | 0.94  | 1.15  | 0.54  | <0.001 | 0.46  | 0.63  | 0.83  | 0.096  | 0.67  | 1.03  |
| 18 |                           |       |        |       |       |       |        |       |       |       |        |       |       |
| 19 | <b>Place of Residence</b> |       |        |       |       |       |        |       |       |       |        |       |       |
| 20 | Urban (ref.)              | 1.00  |        |       |       | 1.00  |        |       |       | 1.00  |        |       |       |
| 21 | Rural                     | 0.94  | 0.024  | 0.90  | 0.99  | 0.94  | 0.092  | 0.87  | 1.01  | 1.07  | 0.262  | 0.95  | 1.20  |
| 22 |                           |       |        |       |       |       |        |       |       |       |        |       |       |
| 23 | <b>Region</b>             |       |        |       |       |       |        |       |       |       |        |       |       |
| 24 | North (ref.)              | 1.00  |        |       |       | 1.00  |        |       |       | 1.00  |        |       |       |
| 25 | Central                   | 2.28  | <0.001 | 2.07  | 2.51  | 6.08  | <0.001 | 5.26  | 7.04  | 6.45  | <0.001 | 4.78  | 8.71  |
| 26 | East                      | 2.01  | <0.001 | 1.82  | 2.22  | 3.38  | <0.001 | 2.90  | 3.95  | 6.25  | <0.001 | 4.64  | 8.44  |
| 27 | Northeast                 | 11.85 | <0.001 | 10.84 | 12.95 | 14.81 | <0.001 | 12.77 | 17.18 | 51.51 | <0.001 | 38.90 | 68.23 |
| 28 | West                      | 3.40  | <0.001 | 3.10  | 3.73  | 4.84  | <0.001 | 4.14  | 5.65  | 5.85  | <0.001 | 4.26  | 8.03  |
| 29 | South                     | 3.67  | <0.001 | 3.37  | 4.01  | 2.29  | <0.001 | 1.95  | 2.68  | 6.14  | <0.001 | 4.57  | 8.25  |

Note: Ref- Reference

**Supplementary Table 1.** Sample Description of the Study Population

| <b>Background Variables</b>  | <i>N</i> | %    | <b>Background Variables</b>                          | <i>N</i> | %    |
|------------------------------|----------|------|------------------------------------------------------|----------|------|
| <b>Age</b>                   |          |      | <b>Knowledge of Adverse Health Impact of SLT Use</b> |          |      |
| 15-18                        | 4641     | 10.5 | No                                                   | 1051     | 1.4  |
| 19-23                        | 7161     | 13.8 | Partial                                              | 14459    | 20.5 |
| 24-30                        | 13867    | 18.2 | Full                                                 | 58527    | 78.1 |
| 31-40                        | 18839    | 21.0 | <b>Caste</b>                                         |          |      |
| 41-50                        | 13245    | 15.3 | Others                                               | 21734    | 26.8 |
| 51-60                        | 8531     | 10.8 | SCs                                                  | 12854    | 19.1 |
| 60+                          | 7753     | 10.4 | STs                                                  | 12128    | 8.9  |
| <b>Sex</b>                   |          |      | OBCs                                                 | 27321    | 45.3 |
| Female                       | 40265    | 48.9 | <b>Religion</b>                                      |          |      |
| Male                         | 33772    | 51.1 | Hindu                                                | 54015    | 80.3 |
| <b>Marital Status</b>        |          |      | Muslim                                               | 8785     | 14.2 |
| Married                      | 56984    | 70.1 | Christian                                            | 7111     | 2.3  |
| Unmarried                    | 11951    | 23.0 | others                                               | 4126     | 3.1  |
| Widowed/Separated/Divorced   | 5102     | 6.9  | <b>Wealth Quintile</b>                               |          |      |
| <b>Education</b>             |          |      | Poorest                                              | 15547    | 23.4 |
| No formal Education          | 18473    | 26.4 | Poorer                                               | 18685    | 26.3 |
| <Primary completed           | 7510     | 9.2  | Middle                                               | 11278    | 16.8 |
| Primary completed            | 8858     | 11.3 | Richer                                               | 14814    | 19.6 |
| <Secondary completed         | 12109    | 16.9 | Richest                                              | 13713    | 13.8 |
| Secondary completed          | 10331    | 14.1 | <b>Place of Residence</b>                            |          |      |
| Higher Secondary completed   | 7959     | 11.2 | Urban                                                | 26488    | 34.5 |
| College/University completed | 6096     | 7.8  | Rural                                                | 47549    | 65.5 |
| Post-graduate completed      | 2642     | 3.1  | <b>Region</b>                                        |          |      |
| <b>Occupation</b>            |          |      | North                                                | 17128    | 8.7  |
| Student                      | 6134     | 11.9 | Central                                              | 11518    | 29.1 |
| Government Employee          | 3355     | 2.7  | East                                                 | 9834     | 21.7 |
| Non-government Employee      | 6259     | 8.3  | Northeast                                            | 13574    | 3.7  |
| Daily Wage/Casual Labourer   | 13749    | 21.2 | West                                                 | 7901     | 15.0 |
| Self-employed                | 13955    | 19.4 | South                                                | 14082    | 21.8 |
| Homemaker                    | 25833    | 30.1 |                                                      |          |      |
| Retired                      | 1679     | 2.1  |                                                      |          |      |
| Unemployed able to work      | 1572     | 1.9  |                                                      |          |      |
| Unemployed unable to work    | 1471     | 2.3  |                                                      |          |      |
| Don't know or refused        | 30       | 0.0  |                                                      |          |      |

All *N* are unweighted

**Supplementary Table 2.** Prevalence (in %) of Areca Nut Use in Different Forms across States & Union Territories of India, GATS 2016-17

| States/UTs                 | <i>Pan Masala without Tobacco</i> | <i>Pan Masala with Tobacco</i> | <i>Betel Quid without Tobacco</i> | <i>Betel Quid with Tobacco</i> | <i>Areca Nut of Any Type</i> | <i>Gutka, Areca Nut-Tobacco Lime Mixture, or Mawa</i> |
|----------------------------|-----------------------------------|--------------------------------|-----------------------------------|--------------------------------|------------------------------|-------------------------------------------------------|
| <b>North</b>               |                                   |                                |                                   |                                |                              |                                                       |
| <b>Jammu &amp; Kashmir</b> |                                   |                                |                                   |                                |                              |                                                       |
| Kashmir                    | 0.2                               | 0.2                            | 0.3                               | 0.8                            | 0.2                          | 0.4                                                   |
| Himachal Pradesh           | 0.7                               | 0.1                            | 0.4                               | 0.0                            | 0.6                          | 0.5                                                   |
| Punjab                     | 0.5                               | 0.2                            | 0.3                               | 0.4                            | 0.4                          | 2.3                                                   |
| Chandigarh                 | 0.5                               | 0.4                            | 0.6                               | 0.9                            | 1.2                          | 1.0                                                   |
| Uttarakhand                | 3.1                               | 3.1                            | 8.6                               | 2.7                            | 10.8                         | 2.2                                                   |
| Haryana                    | 1.3                               | 0.4                            | 0.5                               | 1.1                            | 1.4                          | 2.5                                                   |
| Delhi                      | 4.9                               | 1.3                            | 8.3                               | 2.6                            | 7.6                          | 3.0                                                   |
| <b>Central</b>             |                                   |                                |                                   |                                |                              |                                                       |
| Rajasthan                  | 3.5                               | 4.6                            | 1.4                               | 4.0                            | 6.1                          | 9.0                                                   |
| Uttar Pradesh              | 7.0                               | 7.2                            | 12.8                              | 10.2                           | 7.6                          | 11.5                                                  |
| Chhattisgarh               | 6.1                               | 1.8                            | 2.1                               | 2.0                            | 3.4                          | 7.8                                                   |
| Madhya Pradesh             | 3.8                               | 4.4                            | 2.4                               | 4.1                            | 6.7                          | 13.7                                                  |
| <b>East</b>                |                                   |                                |                                   |                                |                              |                                                       |
| West Bengal                | 4.8                               | 2.2                            | 5.7                               | 6.4                            | 11.6                         | 2.9                                                   |
| Jharkhand                  | 7.4                               | 1.1                            | 1.2                               | 4.9                            | 2.0                          | 8.3                                                   |
| Odisha                     | 11.1                              | 8.6                            | 4.9                               | 8.6                            | 5.5                          | 9.4                                                   |
| Bihar                      | 5.2                               | 1.4                            | 1.5                               | 3.4                            | 2.3                          | 3.7                                                   |
| <b>North-East</b>          |                                   |                                |                                   |                                |                              |                                                       |
| Sikkim                     | 4.7                               | 0.5                            | 5.4                               | 2.6                            | 7.0                          | 1.2                                                   |
| Arunachal Pradesh          | 11.5                              | 4.7                            | 13.6                              | 14.9                           | 5.1                          | 18.9                                                  |
| Nagaland                   | 8.7                               | 21.1                           | 8.8                               | 17.5                           | 2.2                          | 9.4                                                   |
| Manipur                    | 7.9                               | 4.2                            | 23.1                              | 38.6                           | 1.1                          | 2.7                                                   |
| Mizoram                    | 4.0                               | 0.8                            | 55.1                              | 4.3                            | 5.9                          | 4.0                                                   |
| Tripura                    | 6.4                               | 10.4                           | 8.3                               | 39.5                           | 22.6                         | 2.5                                                   |
| Meghalaya                  | 10.7                              | 2.5                            | 64.9                              | 12.0                           | 3.8                          | 2.4                                                   |
| Assam                      | 10.9                              | 2.9                            | 46.6                              | 19.0                           | 11.9                         | 8.2                                                   |
| <b>West</b>                |                                   |                                |                                   |                                |                              |                                                       |
| Gujarat                    | 3.5                               | 1.4                            | 4.9                               | 1.1                            | 4.7                          | 12.8                                                  |
| Maharashtra                | 6.6                               | 1.7                            | 6.7                               | 3.7                            | 17.0                         | 8.6                                                   |
| Goa                        | 7.2                               | 1.3                            | 9.6                               | 2.7                            | 11.0                         | 2.6                                                   |
| <b>South</b>               |                                   |                                |                                   |                                |                              |                                                       |
| Andhra Pradesh             | 0.3                               | 0.2                            | 4.9                               | 2.4                            | 5.6                          | 1.9                                                   |
| Telangana                  | 2.9                               | 1.1                            | 3.1                               | 3.9                            | 8.0                          | 2.9                                                   |
| Karnataka                  | 4.7                               | 0.7                            | 27.8                              | 9.4                            | 8.3                          | 5.9                                                   |
| Kerala                     | 1.2                               | 0.4                            | 2.1                               | 4.4                            | 0.9                          | 0.7                                                   |
| Tamil Nadu                 | 0.2                               | 0.1                            | 18.6                              | 6.0                            | 19.1                         | 0.7                                                   |

1  
2  
3  
4  
5  
6  
7  
8  
9  
10  
11  
12  
13  
14  
15  
16  
17  
18  
19  
20  
21  
22  
23  
24  
25  
26  
27  
28  
29  
30  
31  
32  
33  
34  
35  
36  
37  
38  
39  
40  
41  
42  
43  
44  
45  
46  
47  
48  
49  
50  
51  
52  
53  
54  
55  
56  
57  
58  
59  
60

|              |            |            |            |            |            |            |
|--------------|------------|------------|------------|------------|------------|------------|
| Puducherry   | 0.8        | 0.1        | 7.7        | 3.4        | 15.1       | 0.7        |
| <b>India</b> | <b>4.8</b> | <b>2.8</b> | <b>8.7</b> | <b>5.8</b> | <b>8.0</b> | <b>6.8</b> |

---

For peer review only



**Supplementary Table 3.** Prevalence (in %) of Areca Nut Use in Different Forms Across States & Union Territories of India, GATS 2016-17

| States/UTs        | Urban                              |                                 |            |          | Rural                              |                                 |            |          |
|-------------------|------------------------------------|---------------------------------|------------|----------|------------------------------------|---------------------------------|------------|----------|
|                   | Areca nut use without tobacco only | Areca nut use with tobacco only | Both Forms | Any Form | Areca nut use without tobacco only | Areca nut use with tobacco only | Both Forms | Any Form |
| <b>North</b>      |                                    |                                 |            |          |                                    |                                 |            |          |
| Jammu & Kashmir   | 1.2                                | 0.7                             | 0.0        | 1.8      | 0.1                                | 0.9                             | 0.0        | 1.1      |
| Himachal Pradesh  | 3.3                                | 1.6                             | 0.0        | 4.9      | 1.0                                | 0.2                             | 0.0        | 1.2      |
| Punjab            | 1.3                                | 3.7                             | 0.3        | 5.3      | 0.8                                | 0.8                             | 0.1        | 1.7      |
| Chandigarh        | 1.7                                | 1.6                             | 0.1        | 3.5      | 1.9                                | 0.0                             | 0.0        | 1.9      |
| Uttarakhand       | 19.8                               | 4.2                             | 1.4        | 25.4     | 16.3                               | 3.6                             | 1.2        | 21.0     |
| Haryana           | 3.0                                | 4.7                             | 0.4        | 8.2      | 2.3                                | 0.8                             | 0.1        | 3.3      |
| Delhi             | 15.9                               | 2.0                             | 1.0        | 18.9     | 3.4                                | 2.1                             | 0.0        | 5.5      |
| <b>Central</b>    |                                    |                                 |            |          |                                    |                                 |            |          |
| Rajasthan         | 9.1                                | 8.8                             | 1.2        | 19.0     | 7.0                                | 5.6                             | 1.4        | 14.0     |
| Uttar Pradesh     | 26.0                               | 9.2                             | 3.2        | 38.4     | 15.7                               | 13.5                            | 3.5        | 32.7     |
| Chhattisgarh      | 10.6                               | 12.4                            | 1.5        | 24.5     | 7.6                                | 5.6                             | 1.0        | 14.2     |
| Madhya Pradesh    | 11.9                               | 12.3                            | 2.7        | 26.9     | 7.1                                | 13.9                            | 1.8        | 22.9     |
| <b>East</b>       |                                    |                                 |            |          |                                    |                                 |            |          |
| West Bengal       | 8.2                                | 2.4                             | 2.8        | 13.4     | 16.3                               | 5.1                             | 4.3        | 25.7     |
| Jharkhand         | 7.8                                | 7.7                             | 0.8        | 16.3     | 8.4                                | 8.4                             | 1.2        | 18.0     |
| Odisha            | 13.5                               | 13.3                            | 1.6        | 28.4     | 10.8                               | 11.1                            | 5.5        | 27.4     |
| Bihar             | 4.3                                | 5.7                             | 0.4        | 10.4     | 7.4                                | 4.9                             | 0.5        | 12.8     |
| <b>North-East</b> |                                    |                                 |            |          |                                    |                                 |            |          |
| Sikkim            | 13.3                               | 1.3                             | 0.3        | 15.0     | 10.7                               | 1.6                             | 0.9        | 13.2     |
| Arunachal Pradesh | 18.1                               | 13.3                            | 4.4        | 35.8     | 17.1                               | 20.3                            | 3.4        | 40.9     |
| Nagaland          | 10.6                               | 15.2                            | 7.0        | 32.7     | 9.2                                | 15.1                            | 5.2        | 29.4     |
| Manipur           | 27.0                               | 18.7                            | 4.2        | 49.9     | 21.7                               | 22.4                            | 7.1        | 51.2     |
| Mizoram           | 51.5                               | 0.3                             | 6.0        | 57.8     | 54.7                               | 1.3                             | 2.3        | 58.4     |
| Tripura           | 12.5                               | 19.9                            | 10.4       | 42.8     | 15.0                               | 15.8                            | 15.6       | 46.5     |
| Meghalaya         | 52.6                               | 1.9                             | 4.4        | 58.9     | 66.3                               | 1.5                             | 6.4        | 74.2     |
| Assam             | 37.5                               | 11.1                            | 8.5        | 57.1     | 47.2                               | 11.5                            | 11.0       | 69.7     |
| <b>West</b>       |                                    |                                 |            |          |                                    |                                 |            |          |
| Gujarat           | 10.4                               | 10.0                            | 1.3        | 21.7     | 6.5                                | 12.0                            | 1.0        | 19.5     |
| Maharashtra       | 22.0                               | 7.6                             | 3.2        | 32.8     | 17.5                               | 6.3                             | 2.6        | 26.4     |
| Goa               | 16.2                               | 1.3                             | 0.6        | 18.1     | 19.3                               | 1.3                             | 2.2        | 22.7     |
| <b>South</b>      |                                    |                                 |            |          |                                    |                                 |            |          |
| Andhra Pradesh    | 8.3                                | 0.8                             | 0.6        | 9.8      | 5.9                                | 1.5                             | 1.4        | 8.9      |
| Telangana         | 10.7                               | 2.8                             | 2.5        | 16.0     | 7.3                                | 2.8                             | 1.6        | 11.8     |

|    |              |             |            |            |             |             |            |            |             |
|----|--------------|-------------|------------|------------|-------------|-------------|------------|------------|-------------|
| 1  |              |             |            |            |             |             |            |            |             |
| 2  |              |             |            |            |             |             |            |            |             |
| 3  | Karnataka    | 26.6        | 6.3        | 2.9        | 35.8        | 30.3        | 8.7        | 5.3        | 44.2        |
| 4  | Kerala       | 2.4         | 1.8        | 0.5        | 4.7         | 3.7         | 3.5        | 0.4        | 7.6         |
| 5  | Tamil Nadu   | 26.1        | 1.1        | 0.6        | 27.7        | 24.9        | 6.6        | 1.7        | 33.2        |
| 6  | Puducherry   | 13.5        | 0.8        | 0.7        | 15.0        | 27.3        | 4.5        | 3.2        | 34.9        |
| 7  | <b>India</b> | <b>15.7</b> | <b>6.1</b> | <b>2.0</b> | <b>23.8</b> | <b>13.5</b> | <b>7.9</b> | <b>2.7</b> | <b>24.1</b> |
| 8  |              |             |            |            |             |             |            |            |             |
| 9  |              |             |            |            |             |             |            |            |             |
| 10 |              |             |            |            |             |             |            |            |             |
| 11 |              |             |            |            |             |             |            |            |             |
| 12 |              |             |            |            |             |             |            |            |             |
| 13 |              |             |            |            |             |             |            |            |             |
| 14 |              |             |            |            |             |             |            |            |             |
| 15 |              |             |            |            |             |             |            |            |             |
| 16 |              |             |            |            |             |             |            |            |             |
| 17 |              |             |            |            |             |             |            |            |             |
| 18 |              |             |            |            |             |             |            |            |             |
| 19 |              |             |            |            |             |             |            |            |             |
| 20 |              |             |            |            |             |             |            |            |             |
| 21 |              |             |            |            |             |             |            |            |             |
| 22 |              |             |            |            |             |             |            |            |             |
| 23 |              |             |            |            |             |             |            |            |             |
| 24 |              |             |            |            |             |             |            |            |             |
| 25 |              |             |            |            |             |             |            |            |             |
| 26 |              |             |            |            |             |             |            |            |             |
| 27 |              |             |            |            |             |             |            |            |             |
| 28 |              |             |            |            |             |             |            |            |             |
| 29 |              |             |            |            |             |             |            |            |             |
| 30 |              |             |            |            |             |             |            |            |             |
| 31 |              |             |            |            |             |             |            |            |             |
| 32 |              |             |            |            |             |             |            |            |             |
| 33 |              |             |            |            |             |             |            |            |             |
| 34 |              |             |            |            |             |             |            |            |             |
| 35 |              |             |            |            |             |             |            |            |             |
| 36 |              |             |            |            |             |             |            |            |             |
| 37 |              |             |            |            |             |             |            |            |             |
| 38 |              |             |            |            |             |             |            |            |             |
| 39 |              |             |            |            |             |             |            |            |             |
| 40 |              |             |            |            |             |             |            |            |             |
| 41 |              |             |            |            |             |             |            |            |             |
| 42 |              |             |            |            |             |             |            |            |             |
| 43 |              |             |            |            |             |             |            |            |             |
| 44 |              |             |            |            |             |             |            |            |             |
| 45 |              |             |            |            |             |             |            |            |             |
| 46 |              |             |            |            |             |             |            |            |             |
| 47 |              |             |            |            |             |             |            |            |             |
| 48 |              |             |            |            |             |             |            |            |             |
| 49 |              |             |            |            |             |             |            |            |             |
| 50 |              |             |            |            |             |             |            |            |             |
| 51 |              |             |            |            |             |             |            |            |             |
| 52 |              |             |            |            |             |             |            |            |             |
| 53 |              |             |            |            |             |             |            |            |             |
| 54 |              |             |            |            |             |             |            |            |             |
| 55 |              |             |            |            |             |             |            |            |             |
| 56 |              |             |            |            |             |             |            |            |             |
| 57 |              |             |            |            |             |             |            |            |             |
| 58 |              |             |            |            |             |             |            |            |             |
| 59 |              |             |            |            |             |             |            |            |             |
| 60 |              |             |            |            |             |             |            |            |             |

**Supplementary Table 4.** Prevalence (in %) of Areca Nut Use in Different Forms Across States & Union Territories of India, GATS 2016-17

| States/UTs        | Female                             |                                 |            |          | Male                               |                                 |            |          |
|-------------------|------------------------------------|---------------------------------|------------|----------|------------------------------------|---------------------------------|------------|----------|
|                   | Areca nut use without tobacco only | Areca nut use with tobacco only | Both Forms | Any Form | Areca nut use without tobacco only | Areca nut use with tobacco only | Both Forms | Any Form |
| <b>North</b>      |                                    |                                 |            |          |                                    |                                 |            |          |
| Jammu & Kashmir   | 0.3                                | 0.2                             | 0.1        | 0.6      | 0.6                                | 1.5                             | 0.0        | 2.1      |
| Himachal Pradesh  | 0.1                                | 0.0                             | 0.0        | 0.1      | 2.3                                | 0.6                             | 0.1        | 3.0      |
| Punjab            | 1.1                                | 0.1                             | 0.1        | 1.2      | 0.9                                | 3.7                             | 0.2        | 4.8      |
| Chandigarh        | 2.0                                | 0.4                             | 0.0        | 2.4      | 1.6                                | 2.6                             | 0.1        | 4.3      |
| Uttarakhand       | 16.3                               | 1.1                             | 0.0        | 17.4     | 18.7                               | 6.4                             | 2.5        | 27.6     |
| Haryana           | 2.3                                | 0.6                             | 0.1        | 3.0      | 2.9                                | 3.9                             | 0.4        | 7.2      |
| Delhi             | 11.9                               | 1.0                             | 0.3        | 13.2     | 18.9                               | 2.8                             | 1.6        | 23.3     |
| <b>Central</b>    |                                    |                                 |            |          |                                    |                                 |            |          |
| Rajasthan         | 4.9                                | 2.4                             | 0.1        | 7.4      | 10.1                               | 10.4                            | 2.5        | 23.0     |
| Uttar Pradesh     | 14.3                               | 4.8                             | 1.5        | 20.6     | 21.9                               | 19.5                            | 5.3        | 46.7     |
| Chhattisgarh      | 4.2                                | 1.8                             | 0.2        | 6.2      | 12.5                               | 13.1                            | 2.1        | 27.7     |
| Madhya Pradesh    | 4.9                                | 5.5                             | 1.7        | 12.1     | 12.0                               | 20.9                            | 2.5        | 35.3     |
| <b>East</b>       |                                    |                                 |            |          |                                    |                                 |            |          |
| West Bengal       | 13.9                               | 3.5                             | 5.8        | 23.2     | 13.0                               | 4.7                             | 1.8        | 19.4     |
| Jharkhand         | 9.0                                | 0.6                             | 0.5        | 10.1     | 7.6                                | 15.5                            | 1.6        | 24.7     |
| Odisha            | 9.1                                | 4.7                             | 5.9        | 19.6     | 13.5                               | 18.4                            | 3.7        | 35.6     |
| Bihar             | 2.6                                | 0.4                             | 0.1        | 3.2      | 11.0                               | 9.3                             | 0.9        | 21.1     |
| <b>North-East</b> |                                    |                                 |            |          |                                    |                                 |            |          |
| Sikkim            | 13.1                               | 0.5                             | 0.5        | 14.1     | 10.1                               | 2.5                             | 0.9        | 13.5     |
| Arunachal Pradesh | 27.6                               | 10.2                            | 4.8        | 42.6     | 7.8                                | 26.3                            | 2.6        | 36.8     |
| Nagaland          | 8.5                                | 17.3                            | 5.1        | 30.9     | 10.7                               | 13.1                            | 6.4        | 30.2     |
| Manipur           | 22.3                               | 27.4                            | 4.8        | 54.5     | 25.0                               | 14.7                            | 7.3        | 46.9     |
| Mizoram           | 47.4                               | 1.4                             | 6.7        | 55.5     | 58.4                               | 0.2                             | 2.1        | 60.6     |
| Tripura           | 19.4                               | 21.7                            | 20.6       | 61.6     | 9.4                                | 12.6                            | 7.7        | 29.7     |
| Meghalaya         | 60.3                               | 1.7                             | 10.4       | 72.4     | 66.2                               | 1.4                             | 1.5        | 69.1     |
| Assam             | 45.6                               | 13.3                            | 11.1       | 69.9     | 45.6                               | 9.7                             | 10.1       | 65.4     |
| <b>West</b>       |                                    |                                 |            |          |                                    |                                 |            |          |
| Gujarat           | 5.4                                | 3.9                             | 0.9        | 10.2     | 11.0                               | 17.7                            | 1.4        | 30.1     |
| Maharashtra       | 23.3                               | 2.4                             | 3.0        | 28.6     | 16.2                               | 11.2                            | 2.8        | 30.2     |
| Goa               | 20.9                               | 0.4                             | 1.4        | 22.6     | 13.8                               | 2.1                             | 0.9        | 16.8     |
| <b>South</b>      |                                    |                                 |            |          |                                    |                                 |            |          |
| Andhra Pradesh    | 10.0                               | 1.8                             | 2.2        | 14.0     | 3.4                                | 0.8                             | 0.1        | 4.3      |
| Telangana         | 5.8                                | 3.1                             | 2.8        | 11.6     | 11.7                               | 2.6                             | 1.2        | 15.5     |
| Karnataka         | 38.9                               | 2.4                             | 4.8        | 46.2     | 18.7                               | 12.8                            | 3.7        | 35.3     |
| Kerala            | 1.8                                | 2.4                             | 0.6        | 4.8      | 4.4                                | 2.9                             | 0.3        | 7.6      |

|              |             |            |            |             |             |             |            |             |
|--------------|-------------|------------|------------|-------------|-------------|-------------|------------|-------------|
| Tamil Nadu   | 20.8        | 4.5        | 1.3        | 26.5        | 30.4        | 3.0         | 1.1        | 34.4        |
| Puducherry   | 14.1        | 2.3        | 2.3        | 18.7        | 21.5        | 1.5         | 0.5        | 23.4        |
| <b>India</b> | <b>13.2</b> | <b>3.4</b> | <b>2.3</b> | <b>18.9</b> | <b>15.2</b> | <b>11.0</b> | <b>2.6</b> | <b>28.8</b> |

For peer review only

## STROBE Statement—checklist of items that should be included in reports of observational studies

|                              | Item No | Recommendation                                                                                                                                                                                                                                                                                                                                                                                                                                                                                                                                                                                                                                                                                   | Page No            |
|------------------------------|---------|--------------------------------------------------------------------------------------------------------------------------------------------------------------------------------------------------------------------------------------------------------------------------------------------------------------------------------------------------------------------------------------------------------------------------------------------------------------------------------------------------------------------------------------------------------------------------------------------------------------------------------------------------------------------------------------------------|--------------------|
| <b>Title and abstract</b>    | 2       | (a) Indicate the study's design with a commonly used term in the title or the abstract<br>(b) Provide in the abstract an informative and balanced summary of what was done and what was found                                                                                                                                                                                                                                                                                                                                                                                                                                                                                                    | 2                  |
| <b>Introduction</b>          |         |                                                                                                                                                                                                                                                                                                                                                                                                                                                                                                                                                                                                                                                                                                  |                    |
| Background/rationale         | 5       | Explain the scientific background and rationale for the investigation being reported                                                                                                                                                                                                                                                                                                                                                                                                                                                                                                                                                                                                             | 5-6                |
| Objectives                   | 6       | State specific objectives, including any prespecified hypotheses                                                                                                                                                                                                                                                                                                                                                                                                                                                                                                                                                                                                                                 | 6                  |
| <b>Methods</b>               |         |                                                                                                                                                                                                                                                                                                                                                                                                                                                                                                                                                                                                                                                                                                  |                    |
| Study design                 | 6       | Present key elements of study design early in the paper                                                                                                                                                                                                                                                                                                                                                                                                                                                                                                                                                                                                                                          | 6-7                |
| Setting                      | 6       | Describe the setting, locations, and relevant dates, including periods of recruitment, exposure, follow-up, and data collection                                                                                                                                                                                                                                                                                                                                                                                                                                                                                                                                                                  | 6-7                |
| Participants                 | 6       | (a) <i>Cohort study</i> —Give the eligibility criteria, and the sources and methods of selection of participants. Describe methods of follow-up<br><i>Case-control study</i> —Give the eligibility criteria, and the sources and methods of case ascertainment and control selection. Give the rationale for the choice of cases and controls<br><i>Cross-sectional study</i> —Give the eligibility criteria, and the sources and methods of selection of participants<br>(b) <i>Cohort study</i> —For matched studies, give matching criteria and number of exposed and unexposed<br><i>Case-control study</i> —For matched studies, give matching criteria and the number of controls per case |                    |
| Variables                    | 7       | Clearly define all outcomes, exposures, predictors, potential confounders, and effect modifiers. Give diagnostic criteria, if applicable                                                                                                                                                                                                                                                                                                                                                                                                                                                                                                                                                         | 7-9                |
| Data sources/<br>measurement | 6       | For each variable of interest, give sources of data and details of methods of assessment (measurement). Describe comparability of assessment methods if there is more than one group                                                                                                                                                                                                                                                                                                                                                                                                                                                                                                             | 7-9                |
| Bias                         | 8       | Describe any efforts to address potential sources of bias                                                                                                                                                                                                                                                                                                                                                                                                                                                                                                                                                                                                                                        | 6                  |
| Study size                   | 9       | Explain how the study size was arrived at                                                                                                                                                                                                                                                                                                                                                                                                                                                                                                                                                                                                                                                        | 6                  |
| Quantitative variables       | 8       | Explain how quantitative variables were handled in the analyses. If applicable, describe which groupings were chosen and why                                                                                                                                                                                                                                                                                                                                                                                                                                                                                                                                                                     | 9-10               |
| Statistical methods          | 9-10    | (a) Describe all statistical methods, including those used to control for confounding<br>(b) Describe any methods used to examine subgroups and interactions<br>(c) Explain how missing data were addressed<br>(d) <i>Cohort study</i> —If applicable, explain how loss to follow-up was addressed<br><i>Case-control study</i> —If applicable, explain how matching of cases and controls was addressed<br><i>Cross-sectional study</i> —If applicable, describe analytical methods taking account of sampling strategy<br>(e) Describe any sensitivity analyses                                                                                                                                | 9-10<br>10-10<br>6 |

1  
2  
3  
4  
5  
6  
7  
8  
9  
10  
11  
12  
13  
14  
15  
16  
17  
18  
19  
20  
21  
22  
23  
24  
25  
26  
27  
28  
29  
30  
31  
32  
33  
34  
35  
36  
37  
38  
39  
40  
41  
42  
43  
44  
45  
46  
47  
48  
49  
50  
51  
52  
53  
54  
55  
56  
57  
58  
59  
60

Continued on next page

For peer review only

1  
2  
3  
4  
5  
6  
7  
8  
9  
10  
11  
12  
13  
14  
15  
16  
17  
18  
19  
20  
21  
22  
23  
24  
25  
26  
27  
28  
29  
30  
31  
32  
33  
34  
35  
36  
37  
38  
39  
40  
41  
42  
43  
44  
45  
46  
47  
48  
49  
50  
51  
52  
53  
54  
55  
56  
57  
58  
59  
60

| <b>Results</b>           |     |                                                                                                                                                                                                                                                                                                                                                                                                               | <b>Page no</b> |
|--------------------------|-----|---------------------------------------------------------------------------------------------------------------------------------------------------------------------------------------------------------------------------------------------------------------------------------------------------------------------------------------------------------------------------------------------------------------|----------------|
| Participants             | 13* | (a) Report numbers of individuals at each stage of study—eg numbers potentially eligible, examined for eligibility, confirmed eligible, included in the study, completing follow-up, and analysed<br>(b) Give reasons for non-participation at each stage<br>(c) Consider use of a flow diagram                                                                                                               | 12             |
| Descriptive data         | 14* | (a) Give characteristics of study participants (eg demographic, clinical, social) and information on exposures and potential confounders<br>(b) Indicate number of participants with missing data for each variable of interest<br>(c) <i>Cohort study</i> —Summarise follow-up time (eg, average and total amount)                                                                                           | 12             |
| Outcome data             | 15* | <i>Cohort study</i> —Report numbers of outcome events or summary measures over time<br><i>Case-control study</i> —Report numbers in each exposure category, or summary measures of exposure<br><i>Cross-sectional study</i> —Report numbers of outcome events or summary measures                                                                                                                             | 12-14          |
| Main results             | 16  | (a) Give unadjusted estimates and, if applicable, confounder-adjusted estimates and their precision (eg, 95% confidence interval). Make clear which confounders were adjusted for and why they were included<br>(b) Report category boundaries when continuous variables were categorized<br>(c) If relevant, consider translating estimates of relative risk into absolute risk for a meaningful time period | 12-14          |
| Other analyses           | 17  | Report other analyses done—eg analyses of subgroups and interactions, and sensitivity analyses                                                                                                                                                                                                                                                                                                                | N.A.           |
| <b>Discussion</b>        |     |                                                                                                                                                                                                                                                                                                                                                                                                               |                |
| Key results              | 18  | Summarise key results with reference to study objectives                                                                                                                                                                                                                                                                                                                                                      | 14             |
| Limitations              | 19  | Discuss limitations of the study, taking into account sources of potential bias or imprecision. Discuss both direction and magnitude of any potential bias                                                                                                                                                                                                                                                    | 18             |
| Interpretation           | 20  | Give a cautious overall interpretation of results considering objectives, limitations, multiplicity of analyses, results from similar studies, and other relevant evidence                                                                                                                                                                                                                                    | 14-18          |
| Generalisability         | 21  | Discuss the generalisability (external validity) of the study results                                                                                                                                                                                                                                                                                                                                         | 19             |
| <b>Other information</b> |     |                                                                                                                                                                                                                                                                                                                                                                                                               |                |
| Funding                  | 22  | Give the source of funding and the role of the funders for the present study and, if applicable, for the original study on which the present article is based                                                                                                                                                                                                                                                 | 19             |

\*Give information separately for cases and controls in case-control studies and, if applicable, for exposed and unexposed groups in cohort and cross-sectional studies.

**Note:** An Explanation and Elaboration article discusses each checklist item and gives methodological background and published examples of transparent reporting. The STROBE checklist is best used in conjunction with this article (freely available on the Web sites of PLoS Medicine at <http://www.plosmedicine.org/>, Annals of Internal Medicine at <http://www.annals.org/>, and Epidemiology at <http://www.epidem.com/>). Information on the STROBE Initiative is available at [www.strobe-statement.org](http://www.strobe-statement.org).

# BMJ Open

## Areca nut consumption with and without tobacco among the adult population: a nationally representative study from India

|                                 |                                                                                                                                                                                                                                                                                                                                                                                                                                                |
|---------------------------------|------------------------------------------------------------------------------------------------------------------------------------------------------------------------------------------------------------------------------------------------------------------------------------------------------------------------------------------------------------------------------------------------------------------------------------------------|
| Journal:                        | <i>BMJ Open</i>                                                                                                                                                                                                                                                                                                                                                                                                                                |
| Manuscript ID                   | bmjopen-2020-043987.R1                                                                                                                                                                                                                                                                                                                                                                                                                         |
| Article Type:                   | Original research                                                                                                                                                                                                                                                                                                                                                                                                                              |
| Date Submitted by the Author:   | 10-Mar-2021                                                                                                                                                                                                                                                                                                                                                                                                                                    |
| Complete List of Authors:       | Singh, Prashant Kumar; National Institute of Cancer Prevention and Research,<br>Yadav, Amit<br>Singh, Lucky; National Institute of Medical Statistics<br>Mazumdar, Sumit; Centre for Health Economics<br>Sinha, Dharendra ; South-East Regional Office, World Health Organisation, WHO FCTC Global Hub on Smokeless Tobacco<br>Straif, Kurt; International Agency for Research on Cancer<br>Singh, Shalini; Indian Council of Medical Research |
| <b>Primary Subject Heading</b>: | Smoking and tobacco                                                                                                                                                                                                                                                                                                                                                                                                                            |
| Secondary Subject Heading:      | Addiction                                                                                                                                                                                                                                                                                                                                                                                                                                      |
| Keywords:                       | Public health < INFECTIOUS DISEASES, Health policy < HEALTH SERVICES ADMINISTRATION & MANAGEMENT, Cancer pain < ONCOLOGY                                                                                                                                                                                                                                                                                                                       |
|                                 |                                                                                                                                                                                                                                                                                                                                                                                                                                                |

SCHOLARONE™  
Manuscripts





I, the Submitting Author has the right to grant and does grant on behalf of all authors of the Work (as defined in the below author licence), an exclusive licence and/or a non-exclusive licence for contributions from authors who are: i) UK Crown employees; ii) where BMJ has agreed a CC-BY licence shall apply, and/or iii) in accordance with the terms applicable for US Federal Government officers or employees acting as part of their official duties; on a worldwide, perpetual, irrevocable, royalty-free basis to BMJ Publishing Group Ltd ("BMJ") its licensees and where the relevant Journal is co-owned by BMJ to the co-owners of the Journal, to publish the Work in this journal and any other BMJ products and to exploit all rights, as set out in our [licence](#).

The Submitting Author accepts and understands that any supply made under these terms is made by BMJ to the Submitting Author unless you are acting as an employee on behalf of your employer or a postgraduate student of an affiliated institution which is paying any applicable article publishing charge ("APC") for Open Access articles. Where the Submitting Author wishes to make the Work available on an Open Access basis (and intends to pay the relevant APC), the terms of reuse of such Open Access shall be governed by a Creative Commons licence – details of these licences and which [Creative Commons](#) licence will apply to this Work are set out in our licence referred to above.

Other than as permitted in any relevant BMJ Author's Self Archiving Policies, I confirm this Work has not been accepted for publication elsewhere, is not being considered for publication elsewhere and does not duplicate material already published. I confirm all authors consent to publication of this Work and authorise the granting of this licence.

1  
2  
3  
4 **Areca nut consumption with and without tobacco among the adult population: a**  
5  
6 **nationally representative study from India**  
7  
8

9 Prashant Kumar Singh<sup>12\*</sup>, Amit Yadav<sup>3</sup>, Lucky Singh<sup>4</sup>, Sumit Mazumdar<sup>5</sup>, Dharendra N.  
10 Sinha<sup>6</sup>, Kurt Straif<sup>7</sup>, Shalini Singh<sup>8</sup>  
11  
12  
13  
14  
15

16 **Running head:** Areca nut addiction in India  
17

18 **Word count:** 3168 (excluding abstract, references, tables)  
19  
20  
21  
22  
23  
24  
25  
26  
27  
28  
29  
30  
31  
32  
33  
34  
35  
36

---

37 \* Corresponding Author: Dr. Prashant Kumar Singh, [prashants.geo@gmail.com](mailto:prashants.geo@gmail.com)

38  
39 <sup>1</sup> Division of Preventive Oncology & Population Health, ICMR-National Institute of Cancer  
40 Prevention and Research, Indian Council of Medical Research (ICMR), Noida, India. Email:  
41 [prashants.geo@gmail.com](mailto:prashants.geo@gmail.com)  
42

43 <sup>2</sup> WHO – FCTC Global Knowledge Hub on Smokeless Tobacco, ICMR-National Institute of Cancer  
44 Prevention and Research, Indian Council of Medical Research (ICMR), Noida  
45

46 <sup>3</sup> Center for Tobacco Control Research and Education, University of California, San Francisco, USA.  
47 Email: [advocateamit@msn.com](mailto:advocateamit@msn.com)

48 <sup>4</sup> ICMR-National Institute of Medical Statistics, Indian Council of Medical Research (ICMR), Ansari  
49 Nagar, New Delhi, India. Email: [lucky.5bhu@gmail.com](mailto:lucky.5bhu@gmail.com)  
50

51 <sup>5</sup>Centre for Health Economics, University of York, YO10 5DD, United Kingdom. Email:  
52 [sumitmazumdar@gmail.com](mailto:sumitmazumdar@gmail.com)  
53

54 <sup>6</sup> School of Preventive Oncology, Patna, India. Email: [dhirendrasinha1@gmail.com](mailto:dhirendrasinha1@gmail.com)

55 <sup>7</sup>International Agency for Research on Cancer (IARC), Lyon, France. Email: [straif.kurt@gmail.com](mailto:straif.kurt@gmail.com)  
56

57 <sup>8</sup> ICMR-National Institute of Cancer Prevention and Research & WHO – FCTC Global Knowledge  
58 Hub on Smokeless Tobacco, ICMR-National Institute of Cancer Prevention and Research, Indian  
59 Council of Medical Research (ICMR), Noida, India. Email: [shalinisingh.icmr@gmail.com](mailto:shalinisingh.icmr@gmail.com)  
60

1  
2  
3 **Areca nut consumption with and without tobacco among the adult population: a**  
4 **nationally representative study from India**  
5  
6  
7

8 **Abstract**  
9

10  
11 **Objective:** Areca nut is one of the most widely consumed substances globally, after nicotine,  
12 ethanol and caffeine and classified as carcinogenic to humans. This study examines the  
13 disparity and determinants of areca nut consumption with and without tobacco in India.  
14  
15

16  
17  
18 **Design:** Nationally representative cross-sectional study.  
19

20  
21 **Participants:** We utilized the nationally representative Global Adult Tobacco Survey  
22 (GATS) 2016-17. The analytical sample size was 74,037 individual's aged 15 years and  
23 above with a response rate of 92.9%.  
24  
25

26  
27  
28 **Measures:** Current consumption of areca nut without tobacco and with tobacco.  
29

30  
31 **Method:** We examined determinants of areca nut consumption (without tobacco and with  
32 tobacco) using multinomial logistic regression, accounting for the survey design.  
33  
34

35  
36 **Results:** About 23.9% (95%CI 23.1-24.8) of the adult population consume areca nut, i.e.  
37 approximately 223.79 million people in India; 9.7% (95%CI 9.1-10.4) the majority of users  
38 (14.2% 95%CI 13.5-14.9) consumed areca nut with tobacco. When compared to females,  
39 males were more likely to consume areca nut (with tobacco RR=2.02; 95%CI 1.85-2.21 and  
40 without tobacco RR=1.13; 95%CI 1.07-1.20). Age, marital status, education, occupation,  
41 caste, religion and region were significantly associated with areca nut consumption.  
42 However, the direction and magnitude of association differs with respect to the areca nut  
43 consumption with and without tobacco.  
44  
45  
46  
47  
48  
49  
50  
51  
52  
53

54  
55 **Conclusion:** The on-going tobacco control efforts would not address the majority of areca  
56 nut users until greater attention to areca nut consumption without tobacco is reflected in  
57 health policies in India.  
58  
59  
60

1  
2  
3 **Key words:** Areca nut, smokeless tobacco, GATS, India  
4  
5

6 **Strengths and Limitations of this study**  
7  
8

- 9
- 10 • Using a nationally representative survey with a high response rate, this study  
11 disentangled the current prevalence of areca nut consumption with and without  
12 tobacco in India, which has significant policy implications.  
13
  - 14 • The study provided detailed information on socioeconomic determinants of areca nut  
15 consumption, with and without tobacco, and separately for men and women, which  
16 may further guide future policy  
17
  - 18 • The survey covers only people 15 years and older, whereas areca nut consumption  
19 often starts at younger age.  
20
  - 21 • The survey is cross-sectional and cannot provide insights into trends of Areca nut  
22 consumption over time.  
23  
24  
25  
26  
27  
28  
29  
30  
31  
32  
33  
34  
35  
36  
37  
38  
39  
40  
41  
42  
43  
44  
45  
46  
47  
48  
49  
50  
51  
52  
53  
54  
55  
56  
57  
58  
59  
60

view only

## Introduction

Areca nut is one of the most widely consumed substances globally, after nicotine, ethanol and caffeine[1,2]. Owing to its addictive properties, areca nut is estimated to be consumed by hundreds of millions of people across various countries [3]. However, addiction to areca nut is primarily prevalent in many Asia-Pacific countries and by emigrants from these countries in other parts of world [3]. It is not only known by several, sometimes local names, but also consumed in several forms e.g. pan masala, gutkha, mawa, dohra, kharra, betel etc. with or without tobacco[4,5]. Some forms of consumption may also include other constituents, such as betel leaf, slaked lime and various spices.

The International Agency for Research on Cancer (IARC) classified areca nut consumption with or without tobacco as carcinogenic to humans[6]. A meta-analysis based on 50 studies worldwide reported increased relative risks for cancer of the oral cavity and oropharynx for the Indian subcontinent and areca nut consumption with tobacco (Relative Risk 7.03; 95%CI, 4.68–10.56) and areca nut consumption without tobacco (Relative Risk 3.22; 95%CI, 2.11–4.92) [7]. A global systematic review based on 62 studies concluded that consumption of areca nut affects almost all organs of the human body, including the brain, heart, lungs, gastrointestinal tract and reproductive organs; and causes or aggravates pre-existing conditions such as neuronal injury, myocardial infarction, cardiac arrhythmias, hepatotoxicity, asthma, central obesity, type II diabetes, hyperlipidemia, metabolic syndrome[8]. It has harmful effects on the foetus when used during pregnancy[8]. Previous studies observed that areca nut dependency among users [9] and its withdrawal effects [10] were similar to those observed among nicotine users [10]. It is also a gateway product in children who start using different kinds of areca nut products at an early age [11].

Despite growing scientific evidence of high addictiveness and several ill effects(8-11) associated with areca nut consumption, research on areca nut has not received much

1  
2  
3 attention[3]. The large global and national movement that addresses tobacco control under  
4 the ambit of the WHO Framework Convention on Tobacco Control (FCTC) has focused  
5 primarily on smoking and has been less effective in controlling smokeless tobacco (SLT)  
6 [12]. The regulatory framework for areca nut control has also remained limited to prescribing  
7 health warnings on areca nut products by the Food Safety and Standard Authority of India  
8 (FSSAI). Further, use of tobacco and nicotine as an ingredient in any food item is also  
9 prohibited under FSSAI regulations, thereby restricting mixing of tobacco in areca nut  
10 products and vice-versa[1]. Although tobacco control policies are applicable to areca nut  
11 products which contain tobacco a considerable number of people now consume areca nut  
12 without tobacco, which poses greater public health challenges in controlling and regulating  
13 the substance [13].

14  
15 A comprehensive search of the literature revealed that studies on areca nut use in India lack  
16 representativeness and published studies were restricted to a specific geographical area or  
17 population groups. None of the published studies have examined diverse habits of areca nut  
18 consumption, its disparity and determinants using a nationally representative survey. Also, a  
19 recent global review calls for more research to better understand the epidemiology of areca  
20 nut consumption across different populations and geographies [3].

21  
22 India, with a population of over 1.30 billion, exhibits one of the highest socioeconomic and  
23 demographic heterogeneities ever experienced anywhere in the world at the regional  
24 level[14]. There is considerable evidence of marked regional inequities in tobacco use[15],  
25 health and healthcare [16]and mortality outcomes [17]in India. These differences are  
26 primarily the outcome of differences in community-level development, population  
27 composition, state health expenditure, poverty levels, status of women, and availability,  
28 accessibility and affordability of maternal and child health care services and their utilization  
29 [18–20].

1  
2  
3 While India's share to overall areca nut production and consumption remains at the top in the  
4 world, no attempts have been made to explore the patterns and determinants of the  
5 consumption of areca nut based on large scale representative surveys. This study aims to  
6 examine the disparity and determinants of areca nut consumption, with and without tobacco  
7 using the nationally-representative Global Adult Tobacco Survey (GATS) conducted in 2016-  
8 17.

## 17 **Methods and materials**

### 20 ***Study Design and Participants***

23 We utilized the nationally representative cross-sectional Global Adult Tobacco Survey  
24 (GATS) 2016-17, conducted in all 29 states and three Union Territories (UTs) of India [21].  
25 The study included whole GATS sample of 74,037 adults aged 15 and above. A multi-stage  
26 sampling design separately for rural and urban areas was adopted to draw a representative  
27 sample considering the 2011 census population figures. The household response rate and  
28 person-level response rate were 96.7 percent and 96.0 percent respectively resulting in an  
29 overall response rate of 92.9 percent.

32 The sampling was done independently in each state/UT; and within the state/UT, it was done  
33 independently for urban and rural areas. In urban areas, a three stage sampling process was  
34 adopted. At the first level, the list of all the wards from all cities and towns of the state/ UT  
35 constituted the urban sampling frame, from which a required sample of wards (Primary  
36 Sampling Units - PSUs) was selected using probability proportional to size (PPS) sampling.  
37 At the second level, a list of all census enumeration blocks (CEBs) in each selected ward  
38 constituted the sampling frame from which one CEB was selected by PPS from each ward. At  
39 the third level, a list of all residential households in each selected CEB constituted the  
40 sampling frame, from which a sample of required number of households was selected.

1  
2  
3 In rural areas, a two stage sampling process was adopted. At the first stage of sampling, all  
4 villages in the state/UT formed the sampling frame. All small villages having less than five  
5 households were removed from the sampling frame. Villages with five to 49 households as  
6 per Census of India, 2011 were linked with the neighbouring larger villages. The required  
7 number of PSUs (villages) within each stratum was selected according to PPS sampling. At  
8 the second stage, a list of all residential households in each selected village constituted the  
9 sampling frame, from which a sample of the required number of households was selected.

10  
11  
12 A household listing operation was carried out in each sample area. All large villages with 300  
13 or more households were segmented into three or more segments (depending on village size)  
14 of almost equal proportions, each being about 100-200 households. From all the segments in  
15 each large village, two segments were selected by using PPS sampling. Thirty households  
16 (plus three more, accounting for non-response) were selected from the list of households by  
17 systematic random sampling. The 33 selected households in a PSU were divided into two  
18 groups: 1) households for interview of a male member, and 2) households for interview of a  
19 female member; this was in proportion to the total sample size of male and female interviews  
20 in a state. From the total number of male/ female members aged 15 or above in a household,  
21 one member was randomly selected for the interview.

22  
23  
24 Further details related to survey methodology, sampling design, household and individual  
25 selection, data collection, management and monitoring procedures have been described  
26 elsewhere[21].

### 27 ***Dependent variables***

28  
29 The outcome variable was current consumption of areca nut use, assessed based on the  
30 following questions covered in the GATS:

- 31 i. Do you consume *pan masala* without tobacco? (response options: yes, no and



- 1  
2  
3 refused)  
4  
5  
6 ii. Do you consume betel quid without tobacco? (response options: yes, no and refused)  
7  
8 iii. Do you consume areca nut of any type, plain, powdered or flavoured? (response  
9  
10 options: yes, no and refused)  
11  
12 iv. Betel quid with tobacco? (response: on average, how many times a day do you use)  
13  
14 v. *Gutka*, areca nut-tobacco lime mixture, or *mawa*? (response: on average, how many  
15  
16 times a day do you use)  
17  
18  
19 vi. *Pan masala* with tobacco? (response: on average, how many times a day do you use)  
20  
21

22 Based on the above-mentioned questions asked in GATS, we constructed three sets of  
23 variables: (i) areca nut consumption only without tobacco, (ii) areca nut consumption only  
24 with tobacco and (iii) areca nut consumption with and without tobacco, dual use. Definition  
25 of specific products can be found with the GATS 2 national report[22].  
26  
27  
28  
29  
30

### 31 ***Independent variables***

32  
33  
34 A range of socioeconomic (education, occupation, caste, religious affiliation and wealth  
35 quintile), demographic (age, sex, marital status,), awareness related and contextual level  
36 variables included in this study which were found to be associated with areca nut  
37 consumption in previous studies [23–27]. These variables include age (categorised as 15-18,  
38 19-23, 24-30, 31-40, 41-50, 51-60 and 60+) and sex as male and female. Individual's  
39 education was measured as: (i) no formal education, (ii) below primary, (iii) primary  
40 completed, (iv) below secondary, (v) secondary completed, (vi) completed higher secondary,  
41 (vii) completed college/university and (viii) completed post-graduate level. Individual's  
42 occupation on the other side was assessed based on self-reported information as (i) student,  
43 (ii) government sector, (iii) non-government sector, (iv) casual/ daily labourer, (v) self-  
44 employed, (vi) homemaker, (vii) retired and (viii) unemployed.  
45  
46  
47  
48  
49  
50  
51  
52  
53  
54  
55  
56  
57  
58  
59  
60

1  
2  
3 A wealth index was calculated based on availability of electricity, flush toilet, radio,  
4 television, fixed telephone or cell phone, refrigerator, washing machine,  
5 moped/scooter/motorcycle and car using Principle Component Analysis (PCA)  
6 methodology[28]. There are various ways to assign weighting values to the indicator  
7 variables. Ad hoc weights, such as assigning “1” for a bicycle, “3” for a motorcycle, and “5”  
8 for a car or truck, work to a certain extent, but they are arbitrary and are difficult to assign  
9 when the wealth ordering is not readily apparent. For this reason, Filmer and Pritchett  
10 recommended using principal components analysis (PCA) to assign the indicator weights, the  
11 procedure that is used for the wealth index[29]. This procedure first standardizes the indicator  
12 variables (calculating z scores); then the factor coefficient scores (factor loadings) are  
13 calculated; and finally, for each household, the indicator values are multiplied by the loadings  
14 and summed to produce the household’s index value. In this process, only the first of the  
15 factors produced is used to represent the wealth index. The resulting sum is itself a  
16 standardized score with a mean of zero and a standard deviation of one[28]. Individuals were  
17 divided into five wealth quintiles based on their household score ranges from 1 being poorest  
18 to 5 being wealthiest, with each category representing 20 percent of the score[28].

19  
20  
21  
22  
23  
24  
25  
26  
27  
28  
29  
30  
31  
32  
33  
34  
35  
36  
37  
38  
39  
40  
41 A composite knowledge variable which measures the poor health impact of smokeless  
42 tobacco use was constructed based on the following information asked in the survey:  
43 smokeless tobacco causes serious illness (yes/no), smokeless tobacco cause oral cancer  
44 (yes/no), smokeless tobacco cause dental diseases (yes/no), smokeless tobacco cause harm to  
45 fetus during pregnancy (yes/no), and do you think smokeless tobacco leads to addiction  
46 (yes/no). The new knowledge variable was categorised as: (i) ‘no, to all five awareness’ (ii)  
47 ‘no, to at least one awareness’ and (iii) ‘yes, to all five awareness’.

48  
49  
50  
51  
52  
53  
54  
55  
56  
57 Caste (social group) as categorised based on individual’s self-reporting as Scheduled Castes  
58 (SCs), Scheduled Tribes (STs), Other Backward Classes (OBCs) and others. This broad  
59  
60

1  
2  
3 categorization of caste is based on their socioeconomic disadvantage in education, health,  
4 nutrition, and employment by federal government. For instance, a study has shown that as  
5 compared to other caste, children (age 2-5 years) and adolescents (age 6-18 years) belonging  
6 to scheduled tribes had the greatest risk of mortality (OR = 1.94, 95% CI = 1.47, 2.57),  
7 followed by those from scheduled castes (OR = 1.35, 95% CI = 1.05, 1.74) and other  
8 backward classes (OR = 1.33, 95% CI = 1.05,1.67) [17]. Other studies have also shown lower  
9 enrolment and completion of education among scheduled castes and scheduled tribes due to  
10 various factors [30,31]. Religion captures self-reported follower/believer of Hinduism, Islam,  
11 Christianity and others (which mainly include Sikhs, Jains, Buddhists and non-believers). The  
12 study also considered place of residence as rural and urban as well as all 29 states and three  
13 UTs in the analysis.

### 24 *Analytical strategy*

25  
26 At first, prevalence of areca nut consumption with and without tobacco at national and sub-  
27 national levels along with rural-urban and male-female differences was analyzed. Chi-  
28 squared ( $\chi^2$ ) tests were performed to examine whether variations in areca nut consumption  
29 across independent variables were statistically significant. To examine the associated  
30 between areca nut consumption with various socioeconomic and demographic characteristics,  
31 multinomial logistic regression was used. In the multinomial logit regression, it is assumed  
32 that log odds of outcome/dependent variable either follow linear form or non-binary form;  
33 each outcome/dependent variable is modelled relative to the baseline group or outcome[32].  
34 In this study, we have considered (i) 'non-areca nut user (baseline group)', (ii) 'areca nut  
35 consumption only with tobacco', (iii) areca nut consumption only without tobacco' and (iv)  
36 'areca nut consumption with and without tobacco, dual use'. The study reported the relative  
37 risk ratio (RRR) along with 95% confidence intervals [33]. We calculated the population  
38 burden based on GATS weighted sample population figures, which were provided in the  
39  
40  
41  
42  
43  
44  
45  
46  
47  
48  
49  
50  
51  
52  
53  
54  
55  
56  
57  
58  
59  
60

1  
2  
3 GATS India report[22]. The analysis was adjusted for sampling weights and multistage  
4 sampling design using *svy* command in STATA. Analysis was carried out in STATA, version  
5  
6  
7  
8 15 [34]  
9

### 10 ***Ethics statement***

11  
12  
13 The second round of GATS obtained ethical clearance from the Ethics Committee of Tata  
14 Institute of Social Sciences[22]. No ethics clearance was required for this study, as we used  
15  
16  
17  
18  
19  
20  
21  
22  
23  
24  
25  
26  
27  
28  
29  
30  
31  
32  
33  
34  
35  
36  
37  
38  
39  
40  
41  
42  
43  
44  
45  
46  
47  
48  
49  
50  
51  
52  
53  
54  
55  
56  
57  
58  
59  
60

### 21 ***Patient and public involvement***

22  
23  
24 No patients were involved in the development of the research question, the outcome measures  
25  
26  
27  
28  
29  
30  
31  
32  
33  
34  
35  
36  
37  
38  
39  
40  
41  
42  
43  
44  
45  
46  
47  
48  
49  
50  
51  
52  
53  
54  
55  
56  
57  
58  
59  
60

## 28 **Results**

### 31 ***Descriptive statistics***

32  
33  
34 Of the 74037 respondents, 40265 (48.9%) were women and 33772 (51.1%) were men, and  
35  
36  
37  
38  
39  
40  
41  
42  
43  
44  
45  
46  
47  
48  
49  
50  
51  
52  
53  
54  
55  
56  
57  
58  
59  
60

41  
42  
43  
44 We found that overall, betel quid without tobacco (8.7%; 95%CI 6.7-10.2) was consumed  
45  
46  
47  
48  
49  
50  
51  
52  
53  
54  
55  
56  
57  
58  
59  
60

1  
2  
3 were predominately consumed in many north-eastern states, while betel quid without tobacco  
4  
5 was mainly used in south (**Supplementary table 2**).

### 8 ***Regional disparity in areca nut consumption***

10  
11 We found 23.9 (95%CI 23.1-24.8) adults were consuming areca nut at national level and  
12  
13 14.2% (95%CI 13.6-14.9) were consuming areca nut without tobacco (**Table 2**). **Figure 1**  
14  
15 shows considerable variations in areca nut consumption across states and UTs of India. In  
16  
17 many states areca nut consumption in any form was over 40% among men (like, Uttar  
18  
19 Pradesh, Assam Meghalaya, Mizoram, and Manipur) and women (like, Karnataka, and all  
20  
21 north-eastern states except Nagaland). Areca nut consumption without tobacco was largely  
22  
23 being consumed across north-eastern states, apart from other bigger states like Karnataka  
24  
25 (28.8%; 95%CI 25.6-32.1), Tamil Nadu (25.5%; 95%CI 21.9-29.5) and Maharashtra (20%;  
26  
27 95%CI 17.0-22.5). Nearly 223.4 million people out of the total 932,488,000 population aged  
28  
29 15 and above consume areca nut in India (**Table 3**). The distribution of areca nut users both  
30  
31 in terms of population and proportion across states were as follows: Uttar Pradesh with 49.9  
32  
33 million users contributes to nearly 22% of all areca nut users, followed by Maharashtra with  
34  
35 26.7 million users (12%), Karnataka with 19.8 million (9%) and Tamil Nadu with 17.7  
36  
37 million users (8%). Together, these four states share nearly 51% of all areca nut users in the  
38  
39 country. Not much difference exists between urban and rural areas in areca nut usage patterns  
40  
41 (**Supplementary table 3**). In 18 states/UTs, however, areca nut consumption was higher in  
42  
43 urban areas than rural counterparts. In 13 states/UTs, the opposite pattern was evident.

### 50 ***Demographic and socioeconomic differences in areca nut consumption***

52  
53 Consumption of areca nut in any form was higher among males as compared to females both  
54  
55 at national level as well as in a majority of states (**Supplementary table 4**). All forms of  
56  
57 areca nut consumption were higher in the age group 31-50 years (**Table 4**) as compared with  
58  
59  
60

1  
2  
3 other age categories. 28.8% men (95%CI 27.7-30.0) and 27.1% widowed/separated/divorced  
4 (95%CI 25.3-29.1) were consuming areca nut. Individuals who had completed below the  
5 primary level of schooling consumed higher proportion of areca nut. Areca nut consumption  
6 was highest among daily wage labourers (30.2%; 95%CI 28.7-31.7). We found that a high  
7 percentage of Scheduled Tribes (25.6%; 95%CI 23.0-27.5) and Muslims (30.8%; 95%CI  
8 28.4-33.2) were consuming areca nut.

### 17 *Determinants of areca nut consumption: regression analysis*

19  
20 Regression results suggest that as compared to 15-18 age group, the likelihood of areca nut  
21 consumption with tobacco and dual use was higher in higher age groups (**Table 5**); except  
22 that areca nut consumption without tobacco was lower among the age group 51 and above, as  
23 compared to the 15-18 age groups. Probability of areca nut consumption was higher among  
24 males as compared to females for all three forms. The likelihood of areca nut consumption  
25 without tobacco was higher across all the educational categories as compared to those who  
26 had no formal education. However, the probability of areca nut consumption with tobacco  
27 and in dual-form was declining with increase in the education level of respondents. The  
28 likelihood of areca nut consumption with tobacco and dual-use was significantly higher  
29 among Schedules Castes than Other castes. Probability of all the three forms of areca nut  
30 consumption was higher among Muslims as compared to Hindus.

### 46 **Discussion**

47  
48 The findings of the study revealed that nearly one out of every four adults in India consumes  
49 areca nut, that is, almost 223.79 million users, making areca nut consumption a bigger public  
50 health challenge than use of smokeless tobacco (199 million users) in dealing with substance  
51 use and addiction in the country. The large number of users of areca nut, a known carcinogen  
52 presents a huge public health challenge for the country. Moreover, nearly 10% consume areca  
53  
54  
55  
56  
57  
58  
59  
60

1  
2  
3 nut with tobacco. Thus, considering the wide range of adverse health impacts, effective  
4 implementation on banning of tobacco as an ingredient with areca nut products under  
5 regulation 2.3.4 of the Food Safety and Standards Regulation, 2011 and ban on manufacture  
6 and sale of areca nut products, as implemented in some of the states, is urgently needed [1].  
7  
8  
9  
10  
11

12 We found considerable regional and socioeconomic differences in the consumption of areca  
13 nut. In four states, Meghalaya, Assam, Mizoram and Manipur, over half of the population  
14 consume areca nut. Further, Karnataka, Uttar Pradesh, Tamil Nadu, Maharashtra and Odisha,  
15 constitute nearly 55% of the country's areca nut users. As far as other determinants are  
16 concerned, the findings confirmed that age, gender, marital status, education, occupation,  
17 castes and religion are significantly associated with areca nut consumption. However, the  
18 direction of association differs with respect to areca nut consumption with and without  
19 tobacco. Cheaper and abundant availability, due to large scale domestic production of areca  
20 nut could be one of the key reasons for such high prevalence in the country.  
21  
22  
23  
24  
25  
26  
27  
28  
29  
30  
31  
32  
33

34 We found protective effect of secondary and above level education in the case of areca nut  
35 consumption with tobacco and in both forms. A study from Pakistan also observed that the  
36 consumption of areca nut users increased by grade among school children aged 4 to 16 years  
37 [27]. Areca nut consumption were higher among male than among female, a finding that is  
38 consistent with other studies conducted in Tamil Nadu and Assam in India [26,35] and  
39 countries like Thailand and Taiwan [13]. It may be because areca nut consumption results in  
40 staining of teethe which may not be liked by young and adult females. The age-wise pattern  
41 suggests that areca nut consumption without tobacco began to decline from age 51 onwards.  
42  
43  
44  
45  
46  
47  
48  
49  
50  
51  
52  
53  
54  
55  
56  
57  
58  
59  
60

61 Similar to other studies from India and other neighbouring countries [24,36], we also  
62 observed higher consumption of areca nut with tobacco among daily wage/casual labourers.

1  
2  
3 This study further adds that areca nut consumption without tobacco too was largely  
4 consumed by daily wage/casual labourers, followed by non-government sector. Evidences  
5 suggests that many misconceptions including consuming areca nut improves concentration,  
6 pleasure, helps in anxiety and muscle relaxation and suppresses appetite increases the  
7 likelihood of consumption among those who are engaged in casual labour and have long  
8 working hours [23,37,38]. We found higher consumption of areca nut among STs and SCs  
9 than other caste groups. Further, Muslims were more likely to consume all three forms of  
10 areca nut as compared with Hindus. Previous studies documented higher consumption of  
11 tobacco including SLT, among SCs/STs and Muslims [25,39].  
12  
13  
14  
15  
16  
17  
18  
19  
20  
21  
22  
23

24 Urban-rural differences by state suggest that in 18 states, areca nut consumption was higher  
25 in urban areas than in rural areas. Regression results also revealed higher consumption of  
26 areca nut without tobacco in urban areas than rural counterparts. This is likely due to higher  
27 awareness about harms related to tobacco use in urban areas than rural counterparts. Studies  
28 from India and Pakistan documented that *pan masala* and *gutka* are very popular even in  
29 urban areas due to aggressive advertising, targeting middle class and adolescents, which  
30 improved sale many tobacco and related products including areca nut [40].  
31  
32  
33  
34  
35  
36  
37  
38  
39  
40

41 Our study had some limitations. Information related to areca nut consumption in different  
42 forms in the GATS was based on respondents self-reporting. Thus, the study cannot rule out  
43 social desirability bias – a tendency among some people to respond to questions in a way  
44 which they deem to be more acceptable than would be their ‘correct’ answer [41]. The  
45 nomenclature of various areca nut products in geographically diverse country like India could  
46 be a source of concern, which is difficult to capture in the large scale surveys. Considering  
47 the cross-sectional design of the survey, we did not examine the cause and effect relationship  
48 between socioeconomic characteristics and areca nut consumption. Similarly, the available  
49 data did not allow us to estimate trends of areca nut usage over time, but future analyses of  
50  
51  
52  
53  
54  
55  
56  
57  
58  
59  
60



1  
2  
3 repeated GATS may inform on important trends. Another limitation is that the study is based  
4  
5 on 15 years and older population, whereas the areca nut habits often start at younger age. The  
6  
7 future Global Youth Tobacco Survey (GYTS) should have areca nut related questions similar  
8  
9 to GATS so that detailed usage pattern of areca nut could be examined among younger  
10  
11 population of the country.  
12  
13

## 14 15 **Conclusion**

16  
17  
18 It is now well established that areca nut consumption in any form is highly addictive, a well-  
19  
20 known risk factor for oral, pharynx and oesophageal cancers and is associated with many  
21  
22 adverse health effects. This study adds to the existing knowledge that areca nut consumption  
23  
24 in India was much higher than the overall smokeless tobacco. Moreover, a significant  
25  
26 proportion of areca nut was consumed along with tobacco, which elevates the adverse health  
27  
28 impacts and co-morbidities further. Thus, it calls for urgent policy intervention to prevent  
29  
30 both new generations from taking up areca nut consumption habit and helping current users  
31  
32 to quit. Such policy efforts to control areca nut consumption should be guided by the huge  
33  
34 differences in its consumption across states, gender and socioeconomic groups in India.  
35  
36 Unlike tobacco, for which the WHO FCTC provides evidence-based policies, no global  
37  
38 policy exists for the regulation and control of areca nut consumption and its cessation. Also,  
39  
40 there is a need for further research and population-based interventions to find treatment for  
41  
42 areca nut dependence. In addition, research is needed to examine the intention to quit among  
43  
44 areca nut users, separately for all three categories - those who consumption areca nut with  
45  
46 tobacco, without tobacco and those who consume in both the forms, to develop an  
47  
48 appropriate intervention model for cessation. This information may be collected within the  
49  
50 GATS survey by adding a few additional questions on areca nut for future analysis. Given  
51  
52 that areca nut consumption follows a complex pattern by SES and regional trajectories,  
53  
54 separately for with and without tobacco, future research is needed to explore the various  
55  
56  
57  
58  
59  
60

1  
2  
3 intersections between SES and areca nut consumption in different regions of India to gain  
4  
5 better clarity.  
6  
7

### 8 **Contributorship statement**

9

10  
11 PKS conceived the study. PKS and LS performed the statistical analysis. PKS and LS  
12  
13 analyzed and interpreted the data. PKS and AY drafted the manuscript. SM, DNS, KS and SS  
14  
15 provided comments and contributed to the development of the final draft of the manuscript.  
16  
17 All authors have supervised and approved the manuscript.  
18  
19  
20

### 21 **Competing Interest**

22

23  
24  
25 None declared.  
26  
27

### 28 **Funding**

29

30  
31 This research study received no specific grant from any funding agency in the public,  
32  
33 commercial or not-for-profit sectors.  
34  
35  
36

### 37 **Data sharing statement**

38

39  
40 Data utilized by the study is available by emailing [prashants.geo@gmail.com](mailto:prashants.geo@gmail.com).  
41  
42  
43  
44  
45  
46  
47  
48  
49  
50  
51  
52  
53  
54  
55  
56  
57  
58  
59  
60

## Reference

- 1 Gupta PC, Ray CS, Papke RL, *et al.* Perspectives on areca nut with some global implications: Symposium report. *Transl Res Oral Oncol* 2018;**3**:2057178X18814068.
- 2 Warnakulasuriya S, Peters TJ. Introduction: Biology, medical and socio-economic aspects of areca nut use. *Addict Biol* 2002;**7**:75–6.
- 3 Mehrtash H, Duncan K, Parascandola M, *et al.* Defining a global research and policy agenda for betel quid and areca nut. *Lancet Oncol* 2017;**18**:e767–75.
- 4 National Institute of Cancer Prevention and Research (ICMR). Commonly used smokeless tobacco products around the globe. 2020.<https://untobaccocontrol.org/kh/smokeless-tobacco/paan-betel-quid-tobacco/>
- 5 Patidar KA, Parwani R, Wanjari SP, *et al.* Various terminologies associated with areca nut and tobacco chewing: A review. *J Oral Maxillofac Pathol JOMFP* 2015;**19**:69.
- 6 WHO, IARC Working Group on the Evaluation of Carcinogenic Risks, Cancer IA for R on. *Betel-quid and areca-nut chewing and some areca-nut-derived nitrosamines*. IARC 2004.
- 7 Guha N, Warnakulasuriya S, Vlaanderen J, *et al.* Betel quid chewing and the risk of oral and oropharyngeal cancers: A meta-analysis with implications for cancer control. *Int J cancer* 2014;**135**:1433–43.
- 8 Garg A, Chaturvedi P, Gupta PC. A review of the systemic adverse effects of areca nut or betel nut. *Indian J Med Paediatr Oncol Off J Indian Soc Med Paediatr Oncol* 2014;**35**:3.
- 9 Mirza SS, Shafique K, Vart P, *et al.* Areca nut chewing and dependency syndrome: is the dependence comparable to smoking? A cross sectional study. *Subst Abuse Treat Prev Policy* 2011;**6**:23.
- 10 Papke RL, Horenstein NA, Stokes C. Nicotinic activity of arecoline, the psychoactive element of "Betel Nuts", suggests a basis for habitual use and anti-inflammatory activity. *PLoS One* 2015;**10**:e0140907.
- 11 Chandra PS, Mulla U. Areca nut: the hidden Indian 'gateway' to future tobacco use and oral cancers among youth. *Indian J Med Sci* 2007;**61**:319–21.
- 12 Mehrotra R, Yadav A, Sinha DN, *et al.* Smokeless tobacco control in 180 countries

- 1  
2  
3 across the globe: call to action for full implementation of WHO FCTC measures.  
4  
5 *Lancet Oncol* 2019;**20**:e208–17.  
6  
7 13 Gupta PC, Warnakulasuriya S. Global epidemiology of areca nut usage. *Addict Biol*  
8 2002;**7**:77–83.  
9  
10  
11 14 James KS. India's demographic change: opportunities and challenges. *Science (80-*  
12 2011;**333**:576–80.  
13  
14  
15 15 Singh PK, Yadav A, Lal P, *et al.* Dual Burden of Smoked and Smokeless Tobacco Use  
16 in India, 2009–2017: A Repeated Cross-Sectional Analysis Based on Global Adult  
17 Tobacco Survey. *Nicotine Tob Res* Published Online First: 2020.  
18 doi:10.1093/ntr/ntaa033  
19  
20  
21  
22 16 Singh PK. Trends in Child Immunization across Geographical Regions in India: Focus  
23 on Urban-Rural and Gender Differentials. *PLoS One* 2013;**8**.  
24  
25  
26 17 Subramanian S V, Nandy S, Irving M, *et al.* The mortality divide in India: the  
27 differential contributions of gender, caste, and standard of living across the life course.  
28 *Am J Public Health* 2006;**96**:818–25.  
29  
30  
31  
32 18 Kumar C, Singh PK, Rai RK. Under-five mortality in high focus states in India: a  
33 district level geospatial analysis. *PLoS One* 2012;**7**:e37515.  
34  
35  
36 19 Farahani M, Subramanian S V, Canning D. Effects of state-level public spending on  
37 health on the mortality probability in India. *Health Econ* 2010;**19**:1361–76.  
38  
39  
40 20 Kravdal Ø. Child mortality in India: the community-level effect of education. *Popul*  
41 *Stud (NY)* 2004;**58**:177–92.  
42  
43  
44 21 TISS, MoHFW. Global Adult Tobacco Survey GATS 2 India 2016-17. New Delhi,  
45 India: 2017.  
46  
47  
48 22 Tata Institute of Social Sciences and Ministry of Health and Family Welfare  
49 Government of India. Global Adult Tobacco Survey GATS 2 India 2016-2017 Report.  
50 2017. [https://untobaccocontrol.org/kh/smokeless-tobacco/wp-](https://untobaccocontrol.org/kh/smokeless-tobacco/wp-content/uploads/sites/6/2018/06/GATS_.pdf)  
51 [content/uploads/sites/6/2018/06/GATS\\_.pdf](https://untobaccocontrol.org/kh/smokeless-tobacco/wp-content/uploads/sites/6/2018/06/GATS_.pdf)  
52  
53  
54  
55 23 Ansari ZA, Bano SN, Zulkifle M. Prevalence of tobacco use among power loom  
56 workers-A cross-sectional study. *Indian J community Med Off Publ Indian Assoc Prev*  
57 *Soc Med* 2010;**35**:34.  
58  
59  
60

- 1  
2  
3 24 Bandyopadhyay A, Irfan M. Educational and Wealth Inequalities in Smokeless  
4 Tobacco Use: An Analysis of Rural-Urban Areas of Bangladesh and India. *Subst Abus*  
5 *Res Treat* 2019;**13**:1178221818825074.  
6  
7  
8  
9 25 Bhan N, Karan A, Srivastava S, *et al.* Have socioeconomic inequalities in Tobacco use  
10 in India increased over time? Trends from the national sample surveys (2000–2012).  
11 *Nicotine Tob Res* 2016;**18**:1711–8.  
12  
13  
14 26 Rajan G, Ramesh S, Sankaralingam S. Areca nut use in rural Tamil Nadu: A growing  
15 threat. *Indian J Med Sci* 2007;**61**:332–7.  
16  
17  
18 27 Shah SMA, Merchant AT, Luby SP, *et al.* Addicted schoolchildren: Prevalence and  
19 characteristics of areca nut chewers among primary school children in Karachi,  
20 Pakistan. *J Paediatr Child Health* 2002;**38**:507–10.  
21  
22  
23  
24 28 Rutstein SO, Johnson K. The DHS wealth index . DHS Comp. Reports No. 6. .  
25 2004.<http://dhsprogram.com/pubs/pdf/CR6/CR6.pdf>  
26  
27  
28 29 Filmer D, Pritchett LH. Estimating wealth effects without expenditure data—or tears:  
29 an application to educational enrollments in states of India. *Demography* 2001;**38**:115–  
30 32.  
31  
32  
33 30 Borooah VK. Caste, Religion, and Health Outcomes in India. *Econ Polit Wkly*  
34 2018;**53**:65.  
35  
36  
37 31 Desai S, Dubey A. Caste in 21st century India: Competing narratives. *Econ Polit Wkly*  
38 2012;**46**:40.  
39  
40  
41 32 Scott Long J. Regression models for categorical and limited dependent variables. *Adv*  
42 *Quant Tech Soc Sci* 1997;**7**.  
43  
44  
45 33 Haan P, Uhlenborff A. Estimation of multinomial logit models with unobserved  
46 heterogeneity using maximum simulated likelihood. DIW Discussion Papers 2006.  
47  
48  
49 34 Stata S. Release 15. Statistical software. *StataCorp LP, Coll Station TX* 2017.  
50  
51  
52 35 Mahanta B, Phukan N, Mohapatra PK, *et al.* Betel Nut Chewing Habit and Its  
53 Determinants among Adolescent Boys and Girls in an Industrial Town of Assam,  
54 India.  
55  
56  
57 36 Hashibe M, Jacob BJ, Thomas G, *et al.* Socioeconomic status, lifestyle factors and oral  
58 premalignant lesions. *Oral Oncol* 2003;**39**:664–71.  
59  
60

- 1  
2  
3 37 Gunaseelan R, Shanthi S, Sowmya R, *et al.* Areca nut use among rural residents of  
4 Sriperambudur Taluk: A qualitative study. *Indian J Dent Res* 2007;**18**:11.  
5  
6  
7 38 Thankappan KR, Thresia CU. Tobacco use & social status in Kerala. *Indian J Med Res*  
8 2007;**126**:300.  
9  
10  
11 39 Rani M, Bonu S, Jha P, *et al.* Tobacco use in India: prevalence and predictors of  
12 smoking and chewing in a national cross sectional household survey. *Tob Control*  
13 2003;**12**:e4–e4.  
14  
15  
16 40 Gupta PC, RAY CS. Tobacco and youth in the South East Asian region. *Indian J*  
17 *Cancer* 2002;**39**:5–34.  
18  
19  
20 41 Fisher RJ. Social desirability bias and the validity of indirect questioning. *J Consum*  
21 *Res* 1993;**20**:303–15.  
22  
23  
24  
25  
26  
27  
28  
29  
30  
31  
32  
33  
34  
35  
36  
37  
38  
39  
40  
41  
42  
43  
44  
45  
46  
47  
48  
49  
50  
51  
52  
53  
54  
55  
56  
57  
58  
59  
60

**Figure 1:** Geographical variation in areca nut use among adult men and women in India

**Table 1.** Prevalence (in %) and Number of Users of Different Types of Areca Nut in India, GATS 2016-17

| Tobacco Products                                              | Total          |                | Men              |                | Women          |                | p-value of difference between men and women ( <i>Chi</i> <sup>2</sup> test) | Urban          |                | Rural          |                | p-value of difference between urban and rural areas ( <i>Chi</i> <sup>2</sup> test) |
|---------------------------------------------------------------|----------------|----------------|------------------|----------------|----------------|----------------|-----------------------------------------------------------------------------|----------------|----------------|----------------|----------------|-------------------------------------------------------------------------------------|
|                                                               | % (95%CI)      | Users (in 000) | % (95%CI)        | Users (in 000) | % (95%CI)      | Users (in 000) |                                                                             | % (95%CI)      | Users (in 000) | % (95%CI)      | Users (in 000) |                                                                                     |
| <i>Pan masala</i> without tobacco                             | 4.8 (3.2-5.6)  | 44759          | 6.2 (4.1-8.3)    | 57814          | 3.2 (1.9-5.1)  | 29840          | <0.001                                                                      | 5.2 (3.1-7.7)  | 48489          | 4.5 (2.2-6.8)  | 41962          | >0.005                                                                              |
| <i>Pan masala</i> with Tobacco                                | 2.8 (1.6-3.8)  | 26110          | 4.5 (2.8-5.7)    | 41962          | 1.1 (0.6-2.1)  | 10257          | <0.001                                                                      | 2.3 (1.1-3.8)  | 21447          | 3.1 (1.2-5.2)  | 28907          | >0.005                                                                              |
| Betel Quid without Tobacco                                    | 8.7 (6.7-10.2) | 81126          | 8.4 (5.9-10.8)   | 78329          | 9.0 (6.1-11.9) | 83924          | <0.001                                                                      | 9.1 (6.8-12.6) | 84856          | 8.4 (5.7-10.8) | 78329          | >0.005                                                                              |
| Betel Quid with Tobacco                                       | 5.8 (3.8-7.2)  | 54084          | 7.1 (5.2-9.3)    | 66207          | 5.5 (3.2-7.8)  | 51287          | <0.001                                                                      | 4.3 (2.8-6.3)  | 40097          | 6.6 (4.2-8.3)  | 61544          | <0.005                                                                              |
| Areca Nut of Any Type                                         | 8.0 (5.9-10.3) | 74599          | 8.3 (5.8-11.2)   | 77397          | 7.7 (5.1-9.2)  | 71802          | <0.001                                                                      | 9.1 (6.5-13.1) | 84856          | 7.5 (4.8-9.8)  | 69937          | >0.005                                                                              |
| <i>Gulka</i> , Areca Nut-Tobacco Lime Mixture, or <i>Mawa</i> | 6.8 (5.7-8.6)  | 63409          | 17.8 (15.1-20.2) | 100709         | 2.7 (1.2-4.1)  | 25177          | <0.001                                                                      | 6.3 (3.1-8.7)  | 58747          | 7.1 (4.5-9.8)  | 66207          | <0.005                                                                              |

**Table 2.** Prevalence (in %) of Areca Nut Use in Different Forms across States & Union Territories of India, GATS 2016-17

| States/UTs              | Areca nut use without tobacco only |                    | Areca nut use with tobacco only |                  | Dual use   |                  | Any Form    |                    |
|-------------------------|------------------------------------|--------------------|---------------------------------|------------------|------------|------------------|-------------|--------------------|
| <b>North region</b>     |                                    |                    |                                 |                  |            |                  |             |                    |
| Jammu & Kashmir         | 0.5                                | [0.2,1.2]          | 0.9                             | [0.5,1.5]        | 0.0        | [0.0,0.1]        | 1.4         | [0.8,2.1]          |
| Himachal Pradesh        | 1.2                                | [0.8,1.9]          | 0.3                             | [0.1,0.8]        | 0.0        | [0.0,0.2]        | 1.5         | [1.1,2.3]          |
| Punjab                  | 1.0                                | [0.6,1.6]          | 2.0                             | [0.9,4.2]        | 0.1        | [0.0,0.6]        | 3.1         | [1.8,5.2]          |
| Chandigarh              | 1.7                                | [1.1,2.7]          | 1.6                             | [0.9,3.0]        | 0.1        | [0.0,0.3]        | 3.4         | [2.3,5.1]          |
| Uttarakhand             | 17.5                               | [14.0,21.6]        | 3.8                             | [2.9,4.8]        | 1.3        | [0.7,2.1]        | 22.6        | [18.5,27.1]        |
| Haryana                 | 2.6                                | [1.7,4.0]          | 2.4                             | [1.0,5.3]        | 0.2        | [0.1,0.6]        | 5.2         | [3.3,8.1]          |
| Delhi                   | 15.7                               | [13.0,18.7]        | 2.0                             | [1.3,2.9]        | 1.0        | [0.6,1.7]        | 18.7        | [15.6,22.0]        |
| <b>Central region</b>   |                                    |                    |                                 |                  |            |                  |             |                    |
| Rajasthan               | 7.5                                | [6.3,9.1]          | 6.5                             | [5.3,7.9]        | 1.4        | [0.7,2.5]        | 15.4        | [13.4,17.6]        |
| Uttar Pradesh           | 18.3                               | [16.4,20.3]        | 12.4                            | [11.0,14.0]      | 3.5        | [2.7,4.4]        | 34.2        | [31.9,36.5]        |
| Chhattisgarh            | 8.4                                | [6.4,10.8]         | 7.4                             | [5.9,9.3]        | 1.2        | [0.7,1.8]        | 17.0        | [14.2,20.1]        |
| Madhya Pradesh          | 8.6                                | [7.2,10.2]         | 13.4                            | [11.3,15.9]      | 2.1        | [1.4,3.0]        | 24.1        | [21.2,27.2]        |
| <b>East region</b>      |                                    |                    |                                 |                  |            |                  |             |                    |
| West Bengal             | 13.4                               | [10.7,16.7]        | 4.1                             | [3.0,5.5]        | 3.7        | [2.8,5.0]        | 21.2        | [18.2,24.6]        |
| Jharkhand               | 8.3                                | [6.6,10.3]         | 8.2                             | [6.4,10.5]       | 1.1        | [0.6,2.0]        | 17.6        | [14.3,21.4]        |
| Odisha                  | 11.3                               | [8.6,14.6]         | 11.5                            | [9.6,13.8]       | 4.8        | [3.4,6.6]        | 27.6        | [23.1,32.6]        |
| Bihar                   | 7.0                                | [5.4,9.1]          | 5.0                             | [4.0,6.3]        | 0.5        | [0.3,0.9]        | 12.5        | [10.5,14.8]        |
| <b>Northeast region</b> |                                    |                    |                                 |                  |            |                  |             |                    |
| Sikkim                  | 11.5                               | [8.9,14.9]         | 1.5                             | [0.9,2.6]        | 0.7        | [0.4,1.2]        | 13.7        | [10.8,17.4]        |
| Arunachal Pradesh       | 17.4                               | [14.4,20.8]        | 18.6                            | [13.0,25.8]      | 3.7        | [2.6,5.2]        | 39.7        | [32.6,47.0]        |
| Nagaland                | 9.6                                | [7.6,12.2]         | 15.1                            | [12.7,17.8]      | 5.8        | [4.3,7.8]        | 30.5        | [27.3,34.0]        |
| Manipur                 | 23.7                               | [20.2,27.5]        | 21.0                            | [18.3,24.0]      | 6.0        | [4.6,7.8]        | 50.7        | [47.0,54.4]        |
| Mizoram                 | 52.9                               | [48.3,57.5]        | 0.8                             | [0.4,1.7]        | 4.4        | [3.2,5.9]        | 58.1        | [53.0,62.9]        |
| Tripura                 | 14.3                               | [11.6,17.4]        | 17.0                            | [14.0,20.6]      | 14.0       | [11.0,17.7]      | 45.3        | [42.0,48.7]        |
| Meghalaya               | 63.2                               | [57.5,68.5]        | 1.6                             | [0.9,2.8]        | 6.0        | [4.3,8.2]        | 70.8        | [65.4,75.5]        |
| Assam                   | 45.6                               | [42.8,48.4]        | 11.4                            | [9.9,13.2]       | 10.6       | [9.2,12.2]       | 67.6        | [64.7,70.5]        |
| <b>West region</b>      |                                    |                    |                                 |                  |            |                  |             |                    |
| Gujarat                 | 8.3                                | [6.5,10.5]         | 11.1                            | [8.8,13.9]       | 1.1        | [0.8,1.7]        | 20.5        | [17.8,23.5]        |
| Maharashtra             | 19.6                               | [17.0,22.5]        | 6.9                             | [5.5,8.8]        | 2.9        | [2.0,4.2]        | 29.4        | [25.3,34.0]        |
| Goa                     | 17.3                               | [14.6,20.4]        | 1.3                             | [0.7,2.2]        | 1.1        | [0.7,1.9]        | 19.7        | [16.7,23.1]        |
| <b>South region</b>     |                                    |                    |                                 |                  |            |                  |             |                    |
| Andhra Pradesh          | 6.7                                | [5.2,8.7]          | 1.3                             | [0.7,2.4]        | 1.2        | [0.6,2.4]        | 9.2         | [7.1,11.7]         |
| Telangana               | 8.7                                | [6.9,11.0]         | 2.8                             | [1.8,4.3]        | 2.0        | [1.2,3.3]        | 13.5        | [11.3,16.2]        |
| Karnataka               | 28.8                               | [25.6,32.1]        | 7.7                             | [6.2,9.4]        | 4.3        | [3.4,5.3]        | 40.8        | [36.3,45.2]        |
| Kerala                  | 3.1                                | [2.2,4.3]          | 2.6                             | [1.9,3.6]        | 0.4        | [0.2,1.0]        | 6.1         | [4.7,7.9]          |
| Tamil Nadu              | 25.5                               | [21.9,29.5]        | 3.7                             | [2.5,5.6]        | 1.2        | [0.8,1.7]        | 30.4        | [27.1,34.0]        |
| Puducherry              | 17.7                               | [14.7,21.1]        | 1.9                             | [1.0,3.4]        | 1.4        | [0.9,2.1]        | 21.0        | [17.6,24.9]        |
| <b>India</b>            | <b>14.2</b>                        | <b>[13.6,14.9]</b> | <b>7.3</b>                      | <b>[6.9,7.7]</b> | <b>2.4</b> | <b>[2.2,2.7]</b> | <b>23.9</b> | <b>[23.1,24.8]</b> |



**Table 3.** Population and Share of Areca Nut Use by States & Union Territories (UT) of India, GATS 2016-17

| States/UTs        | Population          | Share (in%)  |
|-------------------|---------------------|--------------|
| Chandigarh        | 33,040              | 0.0          |
| Sikkim            | 68,448              | 0.0          |
| Himachal Pradesh  | 88,112              | 0.0          |
| Jammu & Kashmir   | 1,21,264            | 0.1          |
| Puducherry        | 2,11,680            | 0.1          |
| Goa               | 2,37,779            | 0.1          |
| Arunachal Pradesh | 4,15,800            | 0.2          |
| Nagaland          | 4,59,940            | 0.2          |
| Mizoram           | 4,88,040            | 0.2          |
| Punjab            | 6,99,081            | 0.3          |
| Haryana           | 10,48,632           | 0.5          |
| Manipur           | 11,31,624           | 0.5          |
| Tripura           | 13,16,418           | 0.6          |
| Meghalaya         | 14,93,184           | 0.7          |
| Kerala            | 16,50,843           | 0.7          |
| Uttarakhand       | 17,56,575           | 0.8          |
| Delhi             | 27,61,914           | 1.2          |
| Chhattisgarh      | 32,62,714           | 1.5          |
| Andhra Pradesh    | 36,54,056           | 1.6          |
| Telangana         | 38,09,088           | 1.7          |
| Jharkhand         | 42,61,840           | 1.9          |
| Rajasthan         | 79,00,200           | 3.5          |
| Odisha            | 89,84,904           | 4.0          |
| Bihar             | 90,95,000           | 4.1          |
| Gujarat           | 98,13,760           | 4.4          |
| Madhya Pradesh    | 1,31,45,827         | 5.9          |
| West Bengal       | 1,54,75,728         | 6.9          |
| Assam             | 1,58,33,272         | 7.1          |
| Tamil Nadu        | 1,77,53,296         | 7.9          |
| Karnataka         | 1,98,34,738         | 8.9          |
| Maharashtra       | 2,67,53,412         | 12.0         |
| Uttar Pradesh     | 4,99,32,289         | 22.3         |
| <b>India</b>      | <b>22,37,97,120</b> | <b>100.0</b> |

**Table 4.** Areca Nut Use Pattern by Demographic and Socioeconomic Characteristics, GATS 2016-17

| Background Variables                                 | Areca nut use without tobacco only         |             | Areca nut use with tobacco only            |             | Dual use                                   |           | Any Forms                                  |             |
|------------------------------------------------------|--------------------------------------------|-------------|--------------------------------------------|-------------|--------------------------------------------|-----------|--------------------------------------------|-------------|
|                                                      | %                                          | 95%CI       | %                                          | 95%CI       | %                                          | 95%CI     | %                                          | 95%CI       |
|                                                      | <i>(Chi<sup>2</sup> p-value &lt;0.001)</i> |             | <i>(Chi<sup>2</sup> p-value &lt;0.001)</i> |             | <i>(Chi<sup>2</sup> p-value &lt;0.001)</i> |           | <i>(Chi<sup>2</sup> p-value &lt;0.001)</i> |             |
| <b>Age</b>                                           |                                            |             |                                            |             |                                            |           |                                            |             |
| 15-18                                                | 15.7                                       | [13.9,17.6] | 1.9                                        | [1.4,2.5]   | 0.7                                        | [0.5,1.2] | 18.3                                       | [16.5,20.3] |
| 19-23                                                | 14.8                                       | [13.3,16.4] | 5.4                                        | [4.5,6.4]   | 1.3                                        | [0.9,1.9] | 21.5                                       | [19.8,23.3] |
| 24-30                                                | 14.1                                       | [13.1,15.2] | 8.2                                        | [7.3,9.1]   | 2.4                                        | [2.0,2.9] | 24.7                                       | [23.3,26.1] |
| 31-40                                                | 14.6                                       | [13.6,15.6] | 9.3                                        | [8.6,10.1]  | 2.7                                        | [2.4,3.2] | 26.7                                       | [25.4,28.0] |
| 41-50                                                | 15.2                                       | [14.1,16.3] | 8.1                                        | [7.3,9.0]   | 3.1                                        | [2.6,3.7] | 26.4                                       | [25.0,27.9] |
| 51-60                                                | 13.5                                       | [12.2,14.8] | 8                                          | [7.0,9.0]   | 3.2                                        | [2.6,3.9] | 24.6                                       | [23.1,26.3] |
| 60+                                                  | 11.1                                       | [9.9,12.3]  | 7.8                                        | [6.6,9.0]   | 3.2                                        | [2.6,4.0] | 22.0                                       | [20.2,23.9] |
|                                                      | <i>(Chi<sup>2</sup> p-value &lt;0.001)</i> |             | <i>(Chi<sup>2</sup> p-value &lt;0.001)</i> |             | <i>(Chi<sup>2</sup> p-value &lt;0.001)</i> |           | <i>(Chi<sup>2</sup> p-value &lt;0.001)</i> |             |
| <b>Sex</b>                                           |                                            |             |                                            |             |                                            |           |                                            |             |
| Female                                               | 13.2                                       | [12.5,14.0] | 3.4                                        | [3.0,3.8]   | 2.3                                        | [2.0,2.6] | 18.9                                       | [18.0,19.9] |
| Male                                                 | 15.2                                       | [14.4,16.1] | 11                                         | [10.4,11.8] | 2.6                                        | [2.3,2.9] | 28.8                                       | [27.7,30.0] |
|                                                      | <i>(Chi<sup>2</sup> p-value &lt;0.001)</i> |             | <i>(Chi<sup>2</sup> p-value &lt;0.001)</i> |             | <i>(Chi<sup>2</sup> p-value &lt;0.001)</i> |           | <i>(Chi<sup>2</sup> p-value &lt;0.001)</i> |             |
| <b>Marital Status</b>                                |                                            |             |                                            |             |                                            |           |                                            |             |
| Married                                              | 13.7                                       | [13.1,14.4] | 8.1                                        | [7.6,8.6]   | 2.7                                        | [2.4,3.0] | 24.5                                       | [23.6,25.4] |
| Unmarried                                            | 15.8                                       | [14.6,17.1] | 4.6                                        | [3.9,5.3]   | 1                                          | [0.8,1.4] | 21.4                                       | [20.0,22.9] |
| Widowed/Separated/Divorced                           | 14.3                                       | [12.8,15.9] | 8.3                                        | [7.1,9.7]   | 4.5                                        | [3.7,5.5] | 27.1                                       | [25.3,29.1] |
|                                                      | <i>(Chi<sup>2</sup> p-value &lt;0.001)</i> |             | <i>(Chi<sup>2</sup> p-value &lt;0.001)</i> |             | <i>(Chi<sup>2</sup> p-value &lt;0.001)</i> |           | <i>(Chi<sup>2</sup> p-value &lt;0.001)</i> |             |
| <b>Education</b>                                     |                                            |             |                                            |             |                                            |           |                                            |             |
| No formal education                                  | 11.2                                       | [10.3,12.1] | 8.7                                        | [8.0,9.6]   | 3.7                                        | [3.2,4.2] | 23.6                                       | [22.4,25.0] |
| <Primary completed                                   | 14.7                                       | [13.4,16.1] | 9.7                                        | [8.6,10.9]  | 2.9                                        | [2.4,3.6] | 27.4                                       | [25.6,29.2] |
| Primary completed                                    | 15.4                                       | [14.1,16.9] | 10.0                                       | [8.9,11.2]  | 2.5                                        | [2.0,3.0] | 27.9                                       | [26.2,29.7] |
| <Secondary completed                                 | 16                                         | [14.7,17.3] | 8.5                                        | [7.6,9.5]   | 2.4                                        | [1.9,2.9] | 26.8                                       | [25.3,28.3] |
| Secondary completed                                  | 15.1                                       | [13.8,16.5] | 5.1                                        | [4.4,5.8]   | 1.7                                        | [1.3,2.4] | 21.9                                       | [20.5,23.5] |
| Higher Secondary completed                           | 15.6                                       | [14.0,17.3] | 4.4                                        | [3.6,5.3]   | 1.4                                        | [0.9,2.1] | 21.4                                       | [19.7,23.3] |
| College/University completed                         | 15.5                                       | [13.9,17.3] | 3.0                                        | [2.3,3.8]   | 1.1                                        | [0.7,1.7] | 19.6                                       | [17.8,21.5] |
| Post-graduate completed                              | 12.8                                       | [10.7,15.2] | 2.8                                        | [1.6,4.6]   | 0.9                                        | [0.4,2.4] | 16.5                                       | [14.0,19.3] |
|                                                      | <i>(Chi<sup>2</sup> p-value &lt;0.001)</i> |             | <i>(Chi<sup>2</sup> p-value &lt;0.001)</i> |             | <i>(Chi<sup>2</sup> p-value &lt;0.001)</i> |           | <i>(Chi<sup>2</sup> p-value &lt;0.001)</i> |             |
| <b>Occupation</b>                                    |                                            |             |                                            |             |                                            |           |                                            |             |
| Student                                              | 14.8                                       | [13.2,16.6] | 0.8                                        | [0.5,1.2]   | 0.3                                        | [0.2,0.6] | 15.8                                       | [14.2,17.6] |
| Government Employee                                  | 17.4                                       | [14.9,20.3] | 6.7                                        | [5.1,8.8]   | 1.9                                        | [1.1,3.4] | 26.1                                       | [23.2,29.2] |
| Non-government Employee                              | 16.9                                       | [15.3,18.6] | 10.4                                       | [8.7,12.3]  | 2.7                                        | [2.0,3.8] | 30.0                                       | [27.7,32.5] |
| Daily Wage/Casual Labourer                           | 15.3                                       | [14.2,16.5] | 11.4                                       | [10.4,12.4] | 3.5                                        | [3.0,4.1] | 30.2                                       | [28.7,31.7] |
| Self-employed                                        | 14.9                                       | [13.8,16.2] | 11.7                                       | [10.7,12.7] | 3.1                                        | [2.7,3.7] | 29.7                                       | [28.2,31.4] |
| Homemaker                                            | 12.4                                       | [11.6,13.3] | 3.5                                        | [3.1,4.1]   | 1.9                                        | [1.6,2.3] | 17.9                                       | [16.9,18.9] |
| Retired                                              | 9.1                                        | [7.2,11.6]  | 6.3                                        | [4.1,9.5]   | 2.6                                        | [1.2,5.7] | 18.0                                       | [14.7,22.0] |
| Unemployed able to work                              | 14.6                                       | [11.9,17.8] | 6.5                                        | [4.6,9.2]   | 2.8                                        | [1.7,4.6] | 23.9                                       | [20.3,28.0] |
| Unemployed unable to work                            | 10.7                                       | [8.5,13.2]  | 7                                          | [5.2,9.4]   | 3.4                                        | [2.1,5.4] | 21.1                                       | [18.2,24.4] |
|                                                      | <i>(Chi<sup>2</sup> p-value &lt;0.001)</i> |             | <i>(Chi<sup>2</sup> p-value &lt;0.001)</i> |             | <i>(Chi<sup>2</sup> p-value &lt;0.001)</i> |           | <i>(Chi<sup>2</sup> p-value &lt;0.001)</i> |             |
| <b>Knowledge of adverse health impact of SLT use</b> |                                            |             |                                            |             |                                            |           |                                            |             |
| No                                                   | 11.5                                       | [8.3,15.7]  | 7.7                                        | [5.6,10.4]  | 3.7                                        | [2.2,6.1] | 22.9                                       | [18.6,27.8] |
| Partial                                              | 15.2                                       | [14.1,16.3] | 9                                          | [8.2,9.9]   | 3.4                                        | [2.9,3.9] | 27.5                                       | [26.1,29.0] |
| Full                                                 | 14                                         | [13.4,14.8] | 6.8                                        | [6.4,7.3]   | 2.2                                        | [2.0,2.4] | 23.1                                       | [22.2,24.0] |

1  
2  
3  
4  
5  
6  
7  
8  
9  
10  
11  
12  
13  
14  
15  
16  
17  
18  
19  
20  
21  
22  
23  
24  
25  
26  
27  
28  
29  
30  
31  
32  
33  
34  
35  
36  
37  
38  
39  
40  
41  
42  
43  
44  
45  
46  
47  
48  
49  
50  
51  
52  
53  
54  
55  
56  
57  
58  
59  
60**Caste**

|                        |      |             |     |           |     |           |      |             |
|------------------------|------|-------------|-----|-----------|-----|-----------|------|-------------|
| Others                 | 14.2 | [13.2,15.2] | 6.1 | [5.5,6.9] | 2.6 | [2.2,3.0] | 22.9 | [21.6,24.3] |
| Scheduled Castes       | 12.3 | [11.1,13.5] | 8.4 | [7.5,9.3] | 2.6 | [2.2,3.0] | 23.2 | [21.8,24.6] |
| Scheduled Tribes       | 14.3 | [12.7,16.0] | 8.5 | [7.2,9.5] | 2.8 | [2.1,3.3] | 25.6 | [23.0,27.5] |
| Oother Backward Castes | 15.1 | [14.2,16.1] | 7.3 | [6.8,7.9] | 2.3 | [2.0,2.6] | 24.7 | [23.5,25.9] |

*(Chi<sup>2</sup> p-value <0.001)**(Chi<sup>2</sup> p-value <0.001)**(Chi<sup>2</sup> p-value <0.001)**(Chi<sup>2</sup> p-value <0.001)***Religion**

|           |      |             |     |           |     |           |      |             |
|-----------|------|-------------|-----|-----------|-----|-----------|------|-------------|
| Hindu     | 13.6 | [12.9,14.3] | 7.3 | [6.9,7.8] | 2.3 | [2.1,2.6] | 23.2 | [22.3,24.1] |
| Muslim    | 19   | [17.2,20.9] | 8.5 | [7.3,9.9] | 3.3 | [2.8,4.0] | 30.8 | [28.4,33.2] |
| Christian | 16.2 | [13.6,19.1] | 3.5 | [2.8,4.4] | 2.3 | [1.4,3.7] | 21.9 | [18.9,25.3] |
| Others    | 8.4  | [6.5,10.7]  | 4.1 | [2.7,6.0] | 1.7 | [1.0,3.1] | 14.1 | [11.4,17.4] |

*(Chi<sup>2</sup> p-value <0.001)**(Chi<sup>2</sup> p-value <0.001)**(Chi<sup>2</sup> p-value <0.001)**(Chi<sup>2</sup> p-value <0.001)***Wealth Quintile**

|         |      |             |     |            |     |           |      |             |
|---------|------|-------------|-----|------------|-----|-----------|------|-------------|
| Poorest | 12.1 | [11.1,13.1] | 9.6 | [8.8,10.4] | 3.1 | [2.7,3.6] | 24.7 | [23.4,26.2] |
| Poorer  | 13.7 | [12.8,14.8] | 8.6 | [7.8,9.4]  | 2.9 | [2.5,3.4] | 25.2 | [23.9,26.6] |
| Middle  | 14.6 | [13.5,15.8] | 8.2 | [7.3,9.2]  | 2.4 | [1.9,2.9] | 25.2 | [23.7,26.8] |
| Richer  | 16.1 | [14.8,17.5] | 5.4 | [4.7,6.1]  | 2.0 | [1.5,2.6] | 23.4 | [21.9,25.0] |
| Richest | 15.7 | [14.3,17.3] | 2.7 | [2.2,3.3]  | 1.1 | [0.8,1.6] | 19.5 | [18.0,21.1] |

*(Chi<sup>2</sup> p-value <0.001)**(Chi<sup>2</sup> p-value <0.001)**(Chi<sup>2</sup> p-value <0.001)**(Chi<sup>2</sup> p-value <0.001)***Place of Residence**

|       |      |             |     |           |     |           |      |             |
|-------|------|-------------|-----|-----------|-----|-----------|------|-------------|
| Urban | 15.7 | [14.6,16.9] | 6.1 | [5.4,6.8] | 2.0 | [1.7,2.4] | 23.8 | [22.3,25.4] |
| Rural | 13.5 | [12.7,14.2] | 7.9 | [7.4,8.5] | 2.7 | [2.4,3.0] | 24.1 | [23.1,25.0] |

*(Chi<sup>2</sup> p-value <0.001)**(Chi<sup>2</sup> p-value <0.001)**(Chi<sup>2</sup> p-value <0.001)**(Chi<sup>2</sup> p-value <0.001)***Region**

|           |      |             |      |             |     |            |      |             |
|-----------|------|-------------|------|-------------|-----|------------|------|-------------|
| North     | 5.6  | [4.9,6.4]   | 2.0  | [1.4,2.8]   | 0.4 | [0.3,0.6]  | 8.0  | [7.0,9.1]   |
| Central   | 13.6 | [12.5,14.8] | 11.1 | [10.2,12.1] | 2.6 | [2.2,3.2]  | 27.3 | [25.9,28.8] |
| East      | 10.1 | [8.9,11.6]  | 6.1  | [5.4,6.9]   | 2.4 | [2.0,3.0]  | 18.7 | [17.1,20.4] |
| Northeast | 39.9 | [37.8,42.0] | 11.9 | [10.8,13.2] | 9.6 | [8.6,10.7] | 61.4 | [59.3,63.5] |
| West      | 15.7 | [13.8,17.8] | 8.3  | [7.0,9.8]   | 2.3 | [1.6,3.2]  | 26.3 | [23.3,29.5] |
| South     | 17.3 | [15.8,18.8] | 3.9  | [3.3,4.6]   | 1.9 | [1.6,2.3]  | 23.1 | [21.4,24.9] |

*Chi<sup>2</sup> p-value <0.001*

**Table 5.** Multinomial Regression Analysis showing Determinants of Areca Nut Use, India GATS 2016-17

| Background Variables         | Areca nut use without tobacco |       |      |         | Areca nut use with tobacco |       |      |         | Dual use |       |      |         |
|------------------------------|-------------------------------|-------|------|---------|----------------------------|-------|------|---------|----------|-------|------|---------|
|                              | RR                            | 95%CI |      | p-value | RR                         | 95%CI |      | p-value | RR       | 95%CI |      | p-value |
| <b>Age</b>                   |                               |       |      |         |                            |       |      |         |          |       |      |         |
| 15-18 (ref.)                 | 1.00                          |       |      |         | 1.00                       |       |      |         | 1.00     |       |      |         |
| 19-23                        | 0.91                          | 0.81  | 1.02 | 0.106   | 1.73                       | 1.33  | 2.25 | <0.001  | 1.53     | 1.03  | 2.26 | 0.034   |
| 24-30                        | 0.92                          | 0.81  | 1.04 | 0.202   | 2.37                       | 1.83  | 3.08 | <0.001  | 2.26     | 1.54  | 3.33 | <0.001  |
| 31-40                        | 0.92                          | 0.81  | 1.04 | 0.191   | 2.71                       | 2.08  | 3.52 | <0.001  | 2.72     | 1.84  | 4.03 | <0.001  |
| 41-50                        | 0.91                          | 0.80  | 1.04 | 0.159   | 2.42                       | 1.85  | 3.16 | <0.001  | 2.59     | 1.74  | 3.86 | <0.001  |
| 51-60                        | 0.77                          | 0.67  | 0.89 | <0.001  | 2.14                       | 1.62  | 2.81 | <0.001  | 2.53     | 1.68  | 3.80 | <0.001  |
| 60+                          | 0.65                          | 0.56  | 0.75 | <0.001  | 2.04                       | 1.54  | 2.70 | <0.001  | 2.36     | 1.55  | 3.58 | <0.001  |
| <b>Sex</b>                   |                               |       |      |         |                            |       |      |         |          |       |      |         |
| Female (ref.)                | 1.00                          |       |      |         | 1.00                       |       |      |         | 1.00     |       |      |         |
| Male                         | 1.13                          | 1.07  | 1.20 | <0.001  | 2.02                       | 1.85  | 2.21 | <0.001  | 1.81     | 1.72  | 1.92 | 0.001   |
| <b>Marital Status</b>        |                               |       |      |         |                            |       |      |         |          |       |      |         |
| Married (ref.)               | 1.00                          |       |      |         | 1.00                       |       |      |         | 1.00     |       |      |         |
| Unmarried                    | 0.94                          | 0.86  | 1.02 | 0.16    | 1.06                       | 0.93  | 1.20 | 0.382   | 1.12     | 0.92  | 1.36 | 0.273   |
| Widowed/Separated/Divorced   | 1.37                          | 1.24  | 1.50 | <0.001  | 1.62                       | 1.42  | 1.83 | <0.001  | 1.59     | 1.35  | 1.88 | <0.001  |
| <b>Education</b>             |                               |       |      |         |                            |       |      |         |          |       |      |         |
| No formal education (ref.)   | 1.00                          |       |      |         | 1.00                       |       |      |         | 1.00     |       |      |         |
| <Primary completed           | 1.23                          | 1.14  | 1.34 | <0.001  | 1.01                       | 0.91  | 1.12 | 0.867   | 0.93     | 0.80  | 1.08 | 0.318   |
| Primary completed            | 1.20                          | 1.11  | 1.30 | <0.001  | 1.06                       | 0.96  | 1.17 | 0.264   | 0.82     | 0.70  | 0.96 | 0.016   |
| <Secondary completed         | 1.37                          | 1.27  | 1.48 | <0.001  | 0.99                       | 0.89  | 1.09 | 0.774   | 0.90     | 0.77  | 1.05 | 0.177   |
| Secondary completed          | 1.23                          | 1.13  | 1.34 | <0.001  | 0.79                       | 0.70  | 0.89 | <0.001  | 0.75     | 0.62  | 0.91 | 0.003   |
| Higher Secondary completed   | 1.23                          | 1.11  | 1.35 | <0.001  | 0.74                       | 0.64  | 0.86 | <0.001  | 0.74     | 0.59  | 0.93 | 0.011   |
| College/University completed | 1.18                          | 1.06  | 1.31 | 0.003   | 0.53                       | 0.44  | 0.63 | <0.001  | 0.53     | 0.40  | 0.71 | <0.001  |
| Post-graduate completed      | 1.18                          | 1.02  | 1.36 | 0.023   | 0.35                       | 0.25  | 0.48 | <0.001  | 0.43     | 0.27  | 0.68 | <0.001  |
| <b>Occupation</b>            |                               |       |      |         |                            |       |      |         |          |       |      |         |
| Student (ref.)               | 1.00                          |       |      |         | 1.00                       |       |      |         | 1.00     |       |      |         |
| Government Employee          | 1.15                          | 0.99  | 1.34 | 0.06    | 3.43                       | 2.49  | 4.73 | <0.001  | 2.56     | 1.63  | 4.00 | <0.001  |
| Non-government Employee      | 1.59                          | 1.39  | 1.81 | <0.001  | 4.87                       | 3.64  | 6.53 | <0.001  | 4.17     | 2.75  | 6.30 | <0.001  |
| Daily Wage/Casual Labourer   | 1.65                          | 1.46  | 1.87 | <0.001  | 4.51                       | 3.40  | 5.99 | <0.001  | 3.95     | 2.66  | 5.87 | <0.001  |
| Self-employed                | 1.30                          | 1.15  | 1.47 | <0.001  | 4.34                       | 3.27  | 5.75 | <0.001  | 2.87     | 1.94  | 4.27 | <0.001  |

|    |                                 |      |       |      |        |      |       |      |        |      |       |      |        |
|----|---------------------------------|------|-------|------|--------|------|-------|------|--------|------|-------|------|--------|
| 1  |                                 |      |       |      |        |      |       |      |        |      |       |      |        |
| 2  |                                 |      |       |      |        |      |       |      |        |      |       |      |        |
| 3  | Homemaker                       | 1.26 | 1.11  | 1.42 | <0.001 | 2.61 | 1.95  | 3.49 | <0.001 | 2.11 | 1.42  | 3.13 | <0.001 |
| 4  | Retired                         | 0.95 | 0.77  | 1.17 | 0.604  | 2.28 | 1.56  | 3.33 | <0.001 | 2.21 | 1.29  | 3.77 | 0.004  |
| 5  | Unemployed able to work         | 0.91 | 0.76  | 1.08 | 0.287  | 2.91 | 2.09  | 4.05 | <0.001 | 2.04 | 1.28  | 3.25 | 0.003  |
| 6  | Unemployed unable to work       | 1.24 | 1.01  | 1.52 | 0.039  | 2.56 | 1.79  | 3.67 | <0.001 | 2.49 | 1.51  | 4.09 | <0.001 |
| 8  | <b>Knowledge of adverse</b>     |      |       |      |        |      |       |      |        |      |       |      |        |
| 9  | <b>health impact of SLT use</b> |      |       |      |        |      |       |      |        |      |       |      |        |
| 10 | No (ref.)                       | 1.00 |       |      |        | 1.00 |       |      |        | 1.00 |       |      |        |
| 11 | Partial                         | 1.37 | 1.13  | 1.66 | 0.001  | 1.36 | 1.06  | 1.76 | 0.017  | 1.60 | 1.12  | 2.28 | 0.009  |
| 12 | Full                            | 1.22 | 1.01  | 1.48 | 0.056  | 1.04 | 0.81  | 1.34 | 0.759  | 1.23 | 0.87  | 1.74 | 0.249  |
| 14 | <b>Caste</b>                    |      |       |      |        |      |       |      |        |      |       |      |        |
| 15 | Others (ref.)                   | 1.00 |       |      |        | 1.00 |       |      |        | 1.00 |       |      |        |
| 16 | Scheduled Castes                | 1.05 | 0.97  | 1.13 | 0.197  | 1.17 | 1.05  | 1.29 | 0.004  | 1.25 | 1.07  | 1.46 | 0.005  |
| 17 | Scheduled Tribes                | 1.11 | 1.02  | 1.20 | 0.016  | 0.96 | 0.85  | 1.08 | 0.459  | 0.91 | 0.77  | 1.08 | 0.295  |
| 19 | Oother Backward Castes          | 0.95 | 0.89  | 1.01 | 0.087  | 0.96 | 0.88  | 1.05 | 0.346  | 0.80 | 0.70  | 0.92 | 0.001  |
| 20 | <b>Religion</b>                 |      |       |      |        |      |       |      |        |      |       |      |        |
| 21 | Hindu (ref.)                    | 1.00 |       |      |        | 1.00 |       |      |        | 1.00 |       |      |        |
| 23 | Muslim                          | 1.35 | 1.26  | 1.45 | <0.001 | 1.22 | 1.11  | 1.35 | <0.001 | 1.41 | 1.22  | 1.63 | <0.001 |
| 24 | Christian                       | 0.83 | 0.77  | 0.91 | <0.001 | 0.59 | 0.52  | 0.68 | <0.001 | 0.58 | 0.49  | 0.69 | <0.001 |
| 25 | others                          | 0.61 | 0.55  | 0.68 | <0.001 | 0.50 | 0.42  | 0.60 | <0.001 | 0.36 | 0.27  | 0.47 | <0.001 |
| 26 |                                 |      |       |      |        |      |       |      |        |      |       |      |        |
| 27 | <b>Wealth Quintile</b>          |      |       |      |        |      |       |      |        |      |       |      |        |
| 28 | Poorest (ref.)                  | 1.00 |       |      |        | 1.00 |       |      |        | 1.00 |       |      |        |
| 29 | Poorer                          | 0.94 | 0.88  | 1.00 | 0.062  | 0.96 | 0.88  | 1.04 | 0.321  | 1.11 | 0.98  | 1.25 | 0.097  |
| 30 | Middle                          | 1.02 | 0.95  | 1.11 | 0.573  | 0.97 | 0.88  | 1.08 | 0.628  | 1.00 | 0.85  | 1.17 | 0.964  |
| 31 | Richer                          | 1.03 | 0.96  | 1.12 | 0.403  | 0.79 | 0.70  | 0.89 | <0.001 | 0.79 | 0.66  | 0.95 | 0.01   |
| 32 | Richest                         | 1.04 | 0.94  | 1.15 | 0.305  | 0.54 | 0.46  | 0.63 | <0.001 | 0.83 | 0.67  | 1.03 | 0.096  |
| 34 | <b>Place of Residence</b>       |      |       |      |        |      |       |      |        |      |       |      |        |
| 35 | Urban (ref.)                    | 1.00 |       |      |        | 1.00 |       |      |        | 1.00 |       |      |        |
| 36 | Rural                           | 0.94 | 0.90  | 0.99 | 0.024  | 0.94 | 0.87  | 1.01 | 0.092  | 1.07 | 0.95  | 1.20 | 0.262  |
| 38 | <b>Region</b>                   |      |       |      |        |      |       |      |        |      |       |      |        |
| 39 | North (ref.)                    | 1.00 |       |      |        | 1.00 |       |      |        | 1.00 |       |      |        |
| 40 | Central                         | 2.28 | 2.07  | 2.51 | <0.001 | 6.08 | 5.26  | 7.04 | <0.001 | 6.45 | 4.78  | 8.71 | <0.001 |
| 41 | East                            | 2.01 | 1.82  | 2.22 | <0.001 | 3.38 | 2.90  | 3.95 | <0.001 | 6.25 | 4.64  | 8.44 | <0.001 |
| 42 | Northeast                       | 11.8 | 10.84 | 12.9 | <0.001 | 14.8 | 12.77 | 17.1 | <0.001 | 51.5 | 38.90 | 68.2 | <0.001 |
| 43 |                                 | 5    |       | 5    |        | 1    |       | 8    |        | 1    |       | 3    |        |
| 44 | West                            | 3.40 | 3.10  | 3.73 | <0.001 | 4.84 | 4.14  | 5.65 | <0.001 | 5.85 | 4.26  | 8.03 | <0.001 |
| 45 | South                           | 3.67 | 3.37  | 4.01 | <0.001 | 2.29 | 1.95  | 2.68 | <0.001 | 6.14 | 4.57  | 8.25 | <0.001 |

Note: Ref- Reference

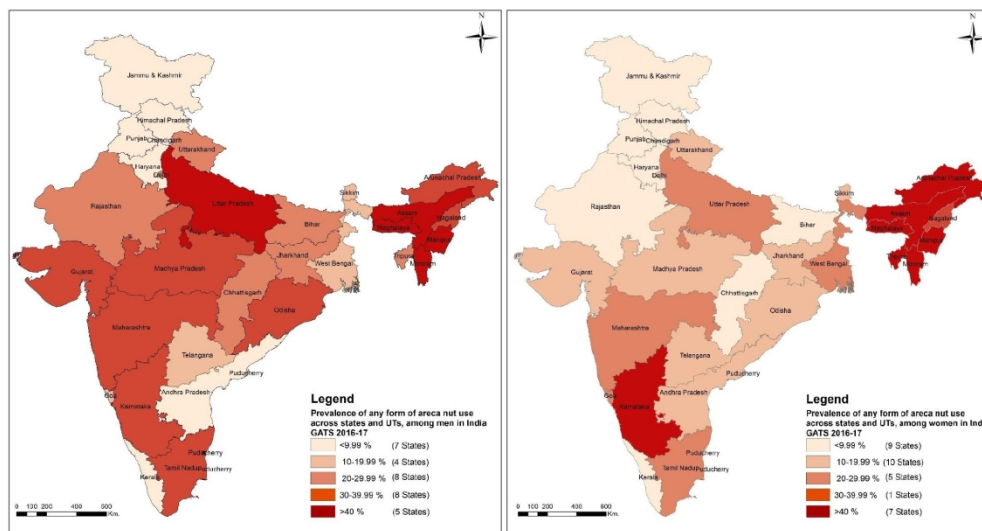

Figure 1: Geographical variation in areca nut use among adult men and women in India

591x312mm (96 x 96 DPI)

**Supplementary Table 1.** Sample Description of the Study Population

| <b>Background Variables</b>  | <i>N</i> | %    | <b>Background Variables</b>                                        | <i>N</i> | %    |
|------------------------------|----------|------|--------------------------------------------------------------------|----------|------|
| <b>Age</b>                   |          |      | <b>Knowledge of Adverse Health Impact of Smokeless Tobacco Use</b> |          |      |
| 15-18                        | 4641     | 10.5 | No                                                                 | 1051     | 1.4  |
| 19-23                        | 7161     | 13.8 | Partial                                                            | 14459    | 20.5 |
| 24-30                        | 13867    | 18.2 | Full                                                               | 58527    | 78.1 |
| 31-40                        | 18839    | 21.0 | <b>Caste</b>                                                       |          |      |
| 41-50                        | 13245    | 15.3 | Others                                                             | 21734    | 26.8 |
| 51-60                        | 8531     | 10.8 | SCs                                                                | 12854    | 19.1 |
| 60+                          | 7753     | 10.4 | STs                                                                | 12128    | 8.9  |
| <b>Sex</b>                   |          |      | OBCs                                                               | 27321    | 45.3 |
| Female                       | 40265    | 48.9 | <b>Religion</b>                                                    |          |      |
| Male                         | 33772    | 51.1 | Hindu                                                              | 54015    | 80.3 |
| <b>Marital Status</b>        |          |      | Muslim                                                             | 8785     | 14.2 |
| Married                      | 56984    | 70.1 | Christian                                                          | 7111     | 2.3  |
| Unmarried                    | 11951    | 23.0 | others                                                             | 4126     | 3.1  |
| Widowed/Separated/Divorced   | 5102     | 6.9  | <b>Wealth Quintile</b>                                             |          |      |
| <b>Education</b>             |          |      | Poorest                                                            | 15547    | 23.4 |
| No formal Education          | 18473    | 26.4 | Poorer                                                             | 18685    | 26.3 |
| <Primary completed           | 7510     | 9.2  | Middle                                                             | 11278    | 16.8 |
| Primary completed            | 8858     | 11.3 | Richer                                                             | 14814    | 19.6 |
| <Secondary completed         | 12109    | 16.9 | Richest                                                            | 13713    | 13.8 |
| Secondary completed          | 10331    | 14.1 | <b>Place of Residence</b>                                          |          |      |
| Higher Secondary completed   | 7959     | 11.2 | Urban                                                              | 26488    | 34.5 |
| College/University completed | 6096     | 7.8  | Rural                                                              | 47549    | 65.5 |
| Post-graduate completed      | 2642     | 3.1  | <b>Region</b>                                                      |          |      |
| <b>Occupation</b>            |          |      | North                                                              | 17128    | 8.7  |
| Student                      | 6134     | 11.9 | Central                                                            | 11518    | 29.1 |
| Government Employee          | 3355     | 2.7  | East                                                               | 9834     | 21.7 |
| Non-government Employee      | 6259     | 8.3  | Northeast                                                          | 13574    | 3.7  |
| Daily Wage/Casual Labourer   | 13749    | 21.2 | West                                                               | 7901     | 15.0 |
| Self-employed                | 13955    | 19.4 | South                                                              | 14082    | 21.8 |
| Homemaker                    | 25833    | 30.1 |                                                                    |          |      |
| Retired                      | 1679     | 2.1  |                                                                    |          |      |
| Unemployed able to work      | 1572     | 1.9  |                                                                    |          |      |
| Unemployed unable to work    | 1471     | 2.3  |                                                                    |          |      |
| Don't know or refused        | 30       | 0.0  |                                                                    |          |      |

All *N* are unweighted

**Supplementary Table 2.** Prevalence (in %) of Areca Nut Use in Different Forms across States & Union Territories of India, GATS 2016-17

| States/UTs        | <i>Pan Masala without Tobacco</i> | <i>Pan Masala with Tobacco</i> | <b>Betel Quid without Tobacco</b> | <b>Betel Quid with Tobacco</b> | <i>Gutka, Areca Nut-Tobacco Lime Mixture, or Mawa</i> | <b>Areca Nut of Any Type</b> |
|-------------------|-----------------------------------|--------------------------------|-----------------------------------|--------------------------------|-------------------------------------------------------|------------------------------|
| <b>North</b>      |                                   |                                |                                   |                                |                                                       |                              |
| Jammu & Kashmir   | 0.2                               | 0.2                            | 0.3                               | 0.8                            | 0.4                                                   | 0.2                          |
| Himachal Pradesh  | 0.7                               | 0.1                            | 0.4                               | 0.0                            | 0.5                                                   | 0.6                          |
| Punjab            | 0.5                               | 0.2                            | 0.3                               | 0.4                            | 2.3                                                   | 0.4                          |
| Chandigarh        | 0.5                               | 0.4                            | 0.6                               | 0.9                            | 1.0                                                   | 1.2                          |
| Uttarakhand       | 3.1                               | 3.1                            | 8.6                               | 2.7                            | 2.2                                                   | 10.8                         |
| Haryana           | 1.3                               | 0.4                            | 0.5                               | 1.1                            | 2.5                                                   | 1.4                          |
| Delhi             | 4.9                               | 1.3                            | 8.3                               | 2.6                            | 3.0                                                   | 7.6                          |
| <b>Central</b>    |                                   |                                |                                   |                                |                                                       |                              |
| Rajasthan         | 3.5                               | 4.6                            | 1.4                               | 4.0                            | 9.0                                                   | 6.1                          |
| Uttar Pradesh     | 7.0                               | 7.2                            | 12.8                              | 10.2                           | 11.5                                                  | 7.6                          |
| Chhattisgarh      | 6.1                               | 1.8                            | 2.1                               | 2.0                            | 7.8                                                   | 3.4                          |
| Madhya Pradesh    | 3.8                               | 4.4                            | 2.4                               | 4.1                            | 13.7                                                  | 6.7                          |
| <b>East</b>       |                                   |                                |                                   |                                |                                                       |                              |
| West Bengal       | 4.8                               | 2.2                            | 5.7                               | 6.4                            | 2.9                                                   | 11.6                         |
| Jharkhand         | 7.4                               | 1.1                            | 1.2                               | 4.9                            | 8.3                                                   | 2.0                          |
| Odisha            | 11.1                              | 8.6                            | 4.9                               | 8.6                            | 9.4                                                   | 5.5                          |
| Bihar             | 5.2                               | 1.4                            | 1.5                               | 3.4                            | 3.7                                                   | 2.3                          |
| <b>North-East</b> |                                   |                                |                                   |                                |                                                       |                              |
| Sikkim            | 4.7                               | 0.5                            | 5.4                               | 2.6                            | 1.2                                                   | 7.0                          |
| Arunachal Pradesh | 11.5                              | 4.7                            | 13.6                              | 14.9                           | 18.9                                                  | 5.1                          |
| Nagaland          | 8.7                               | 21.1                           | 8.8                               | 17.5                           | 9.4                                                   | 2.2                          |
| Manipur           | 7.9                               | 4.2                            | 23.1                              | 38.6                           | 2.7                                                   | 1.1                          |
| Mizoram           | 4.0                               | 0.8                            | 55.1                              | 4.3                            | 4.0                                                   | 5.9                          |
| Tripura           | 6.4                               | 10.4                           | 8.3                               | 39.5                           | 2.5                                                   | 22.6                         |
| Meghalaya         | 10.7                              | 2.5                            | 64.9                              | 12.0                           | 2.4                                                   | 3.8                          |
| Assam             | 10.9                              | 2.9                            | 46.6                              | 19.0                           | 8.2                                                   | 11.9                         |
| <b>West</b>       |                                   |                                |                                   |                                |                                                       |                              |
| Gujarat           | 3.5                               | 1.4                            | 4.9                               | 1.1                            | 12.8                                                  | 4.7                          |
| Maharashtra       | 6.6                               | 1.7                            | 6.7                               | 3.7                            | 8.6                                                   | 17.0                         |
| Goa               | 7.2                               | 1.3                            | 9.6                               | 2.7                            | 2.6                                                   | 11.0                         |
| <b>South</b>      |                                   |                                |                                   |                                |                                                       |                              |
| Andhra Pradesh    | 0.3                               | 0.2                            | 4.9                               | 2.4                            | 1.9                                                   | 5.6                          |
| Telangana         | 2.9                               | 1.1                            | 3.1                               | 3.9                            | 2.9                                                   | 8.0                          |
| Karnataka         | 4.7                               | 0.7                            | 27.8                              | 9.4                            | 5.9                                                   | 8.3                          |



1  
2  
3  
4  
5  
6  
7  
8  
9  
10  
11  
12  
13  
14  
15  
16  
17  
18  
19  
20  
21  
22  
23  
24  
25  
26  
27  
28  
29  
30  
31  
32  
33  
34  
35  
36  
37  
38  
39  
40  
41  
42  
43  
44  
45  
46  
47  
48  
49  
50  
51  
52  
53  
54  
55  
56  
57  
58  
59  
60

|              |            |            |            |            |            |            |
|--------------|------------|------------|------------|------------|------------|------------|
| Kerala       | 1.2        | 0.4        | 2.1        | 4.4        | 0.7        | 0.9        |
| Tamil Nadu   | 0.2        | 0.1        | 18.6       | 6.0        | 0.7        | 19.1       |
| Puducherry   | 0.8        | 0.1        | 7.7        | 3.4        | 0.7        | 15.1       |
| <b>India</b> | <b>4.8</b> | <b>2.8</b> | <b>8.7</b> | <b>5.8</b> | <b>6.8</b> | <b>8.0</b> |

---

For peer review only

**Supplementary Table 3.** Prevalence (in %) of Areca Nut Use in Different Forms by Urban and Rural area Across States & Union Territories of India, GATS 2016-17

| States/UTs        | Urban                              |                                 |          |          | Rural                              |                                 |          |          |
|-------------------|------------------------------------|---------------------------------|----------|----------|------------------------------------|---------------------------------|----------|----------|
|                   | Areca nut use only without tobacco | Areca nut use only with tobacco | Dual use | Any form | Areca nut use only without tobacco | Areca nut use only with tobacco | Dual use | Any form |
| <b>North</b>      |                                    |                                 |          |          |                                    |                                 |          |          |
| Jammu & Kashmir   | 1.2                                | 0.7                             | 0.0      | 1.8      | 0.1                                | 0.9                             | 0.0      | 1.1      |
| Himachal Pradesh  | 3.3                                | 1.6                             | 0.0      | 4.9      | 1.0                                | 0.2                             | 0.0      | 1.2      |
| Punjab            | 1.3                                | 3.7                             | 0.3      | 5.3      | 0.8                                | 0.8                             | 0.1      | 1.7      |
| Chandigarh        | 1.7                                | 1.6                             | 0.1      | 3.5      | 1.9                                | 0.0                             | 0.0      | 1.9      |
| Uttarakhand       | 19.8                               | 4.2                             | 1.4      | 25.4     | 16.3                               | 3.6                             | 1.2      | 21.0     |
| Haryana           | 3.0                                | 4.7                             | 0.4      | 8.2      | 2.3                                | 0.8                             | 0.1      | 3.3      |
| Delhi             | 15.9                               | 2.0                             | 1.0      | 18.9     | 3.4                                | 2.1                             | 0.0      | 5.5      |
| <b>Central</b>    |                                    |                                 |          |          |                                    |                                 |          |          |
| Rajasthan         | 9.1                                | 8.8                             | 1.2      | 19.0     | 7.0                                | 5.6                             | 1.4      | 14.0     |
| Uttar Pradesh     | 26.0                               | 9.2                             | 3.2      | 38.4     | 15.7                               | 13.5                            | 3.5      | 32.7     |
| Chhattisgarh      | 10.6                               | 12.4                            | 1.5      | 24.5     | 7.6                                | 5.6                             | 1.0      | 14.2     |
| Madhya Pradesh    | 11.9                               | 12.3                            | 2.7      | 26.9     | 7.1                                | 13.9                            | 1.8      | 22.9     |
| <b>East</b>       |                                    |                                 |          |          |                                    |                                 |          |          |
| West Bengal       | 8.2                                | 2.4                             | 2.8      | 13.4     | 16.3                               | 5.1                             | 4.3      | 25.7     |
| Jharkhand         | 7.8                                | 7.7                             | 0.8      | 16.3     | 8.4                                | 8.4                             | 1.2      | 18.0     |
| Odisha            | 13.5                               | 13.3                            | 1.6      | 28.4     | 10.8                               | 11.1                            | 5.5      | 27.4     |
| Bihar             | 4.3                                | 5.7                             | 0.4      | 10.4     | 7.4                                | 4.9                             | 0.5      | 12.8     |
| <b>North-East</b> |                                    |                                 |          |          |                                    |                                 |          |          |
| Sikkim            | 13.3                               | 1.3                             | 0.3      | 15.0     | 10.7                               | 1.6                             | 0.9      | 13.2     |
| Arunachal Pradesh | 18.1                               | 13.3                            | 4.4      | 35.8     | 17.1                               | 20.3                            | 3.4      | 40.9     |
| Nagaland          | 10.6                               | 15.2                            | 7.0      | 32.7     | 9.2                                | 15.1                            | 5.2      | 29.4     |
| Manipur           | 27.0                               | 18.7                            | 4.2      | 49.9     | 21.7                               | 22.4                            | 7.1      | 51.2     |
| Mizoram           | 51.5                               | 0.3                             | 6.0      | 57.8     | 54.7                               | 1.3                             | 2.3      | 58.4     |
| Tripura           | 12.5                               | 19.9                            | 10.4     | 42.8     | 15.0                               | 15.8                            | 15.6     | 46.5     |
| Meghalaya         | 52.6                               | 1.9                             | 4.4      | 58.9     | 66.3                               | 1.5                             | 6.4      | 74.2     |
| Assam             | 37.5                               | 11.1                            | 8.5      | 57.1     | 47.2                               | 11.5                            | 11.0     | 69.7     |
| <b>West</b>       |                                    |                                 |          |          |                                    |                                 |          |          |
| Gujarat           | 10.4                               | 10.0                            | 1.3      | 21.7     | 6.5                                | 12.0                            | 1.0      | 19.5     |
| Maharashtra       | 22.0                               | 7.6                             | 3.2      | 32.8     | 17.5                               | 6.3                             | 2.6      | 26.4     |
| Goa               | 16.2                               | 1.3                             | 0.6      | 18.1     | 19.3                               | 1.3                             | 2.2      | 22.7     |
| <b>South</b>      |                                    |                                 |          |          |                                    |                                 |          |          |
| Andhra Pradesh    | 8.3                                | 0.8                             | 0.6      | 9.8      | 5.9                                | 1.5                             | 1.4      | 8.9      |
| Telangana         | 10.7                               | 2.8                             | 2.5      | 16.0     | 7.3                                | 2.8                             | 1.6      | 11.8     |
| Karnataka         | 26.6                               | 6.3                             | 2.9      | 35.8     | 30.3                               | 8.7                             | 5.3      | 44.2     |
| Kerala            | 2.4                                | 1.8                             | 0.5      | 4.7      | 3.7                                | 3.5                             | 0.4      | 7.6      |
| Tamil Nadu        | 26.1                               | 1.1                             | 0.6      | 27.7     | 24.9                               | 6.6                             | 1.7      | 33.2     |
| Puducherry        | 13.5                               | 0.8                             | 0.7      | 15.0     | 27.3                               | 4.5                             | 3.2      | 34.9     |

1  
2  
3  
4  
5  
6  
7  
8  
9  
10  
11  
12  
13  
14  
15  
16  
17  
18  
19  
20  
21  
22  
23  
24  
25  
26  
27  
28  
29  
30  
31  
32  
33  
34  
35  
36  
37  
38  
39  
40  
41  
42  
43  
44  
45  
46  
47  
48  
49  
50  
51  
52  
53  
54  
55  
56  
57  
58  
59  
60

---

|              |             |            |            |             |             |            |            |             |
|--------------|-------------|------------|------------|-------------|-------------|------------|------------|-------------|
| <b>India</b> | <b>15.7</b> | <b>6.1</b> | <b>2.0</b> | <b>23.8</b> | <b>13.5</b> | <b>7.9</b> | <b>2.7</b> | <b>24.1</b> |
|--------------|-------------|------------|------------|-------------|-------------|------------|------------|-------------|

---

For peer review only

**Supplementary Table 4.** Prevalence (in %) of Areca Nut Use in Different Forms by sex Across States & Union Territories of India, GATS 2016-17

| States/UTs        | Female                             |                                 |            |             | Male                               |                                 |            |             |
|-------------------|------------------------------------|---------------------------------|------------|-------------|------------------------------------|---------------------------------|------------|-------------|
|                   | Areca nut use only without tobacco | Areca nut use only with tobacco | Dual use   | Any form    | Areca nut use only without tobacco | Areca nut use only with tobacco | Dual use   | Any form    |
| <b>North</b>      |                                    |                                 |            |             |                                    |                                 |            |             |
| Jammu & Kashmir   | 0.3                                | 0.2                             | 0.1        | 0.6         | 0.6                                | 1.5                             | 0.0        | 2.1         |
| Himachal Pradesh  | 0.1                                | 0.0                             | 0.0        | 0.1         | 2.3                                | 0.6                             | 0.1        | 3.0         |
| Punjab            | 1.1                                | 0.1                             | 0.1        | 1.2         | 0.9                                | 3.7                             | 0.2        | 4.8         |
| Chandigarh        | 2.0                                | 0.4                             | 0.0        | 2.4         | 1.6                                | 2.6                             | 0.1        | 4.3         |
| Uttarakhand       | 16.3                               | 1.1                             | 0.0        | 17.4        | 18.7                               | 6.4                             | 2.5        | 27.6        |
| Haryana           | 2.3                                | 0.6                             | 0.1        | 3.0         | 2.9                                | 3.9                             | 0.4        | 7.2         |
| Delhi             | 11.9                               | 1.0                             | 0.3        | 13.2        | 18.9                               | 2.8                             | 1.6        | 23.3        |
| <b>Central</b>    |                                    |                                 |            |             |                                    |                                 |            |             |
| Rajasthan         | 4.9                                | 2.4                             | 0.1        | 7.4         | 10.1                               | 10.4                            | 2.5        | 23.0        |
| Uttar Pradesh     | 14.3                               | 4.8                             | 1.5        | 20.6        | 21.9                               | 19.5                            | 5.3        | 46.7        |
| Chhattisgarh      | 4.2                                | 1.8                             | 0.2        | 6.2         | 12.5                               | 13.1                            | 2.1        | 27.7        |
| Madhya Pradesh    | 4.9                                | 5.5                             | 1.7        | 12.1        | 12.0                               | 20.9                            | 2.5        | 35.3        |
| <b>East</b>       |                                    |                                 |            |             |                                    |                                 |            |             |
| West Bengal       | 13.9                               | 3.5                             | 5.8        | 23.2        | 13.0                               | 4.7                             | 1.8        | 19.4        |
| Jharkhand         | 9.0                                | 0.6                             | 0.5        | 10.1        | 7.6                                | 15.5                            | 1.6        | 24.7        |
| Odisha            | 9.1                                | 4.7                             | 5.9        | 19.6        | 13.5                               | 18.4                            | 3.7        | 35.6        |
| Bihar             | 2.6                                | 0.4                             | 0.1        | 3.2         | 11.0                               | 9.3                             | 0.9        | 21.1        |
| <b>North-East</b> |                                    |                                 |            |             |                                    |                                 |            |             |
| Sikkim            | 13.1                               | 0.5                             | 0.5        | 14.1        | 10.1                               | 2.5                             | 0.9        | 13.5        |
| Arunachal Pradesh | 27.6                               | 10.2                            | 4.8        | 42.6        | 7.8                                | 26.3                            | 2.6        | 36.8        |
| Nagaland          | 8.5                                | 17.3                            | 5.1        | 30.9        | 10.7                               | 13.1                            | 6.4        | 30.2        |
| Manipur           | 22.3                               | 27.4                            | 4.8        | 54.5        | 25.0                               | 14.7                            | 7.3        | 46.9        |
| Mizoram           | 47.4                               | 1.4                             | 6.7        | 55.5        | 58.4                               | 0.2                             | 2.1        | 60.6        |
| Tripura           | 19.4                               | 21.7                            | 20.6       | 61.6        | 9.4                                | 12.6                            | 7.7        | 29.7        |
| Meghalaya         | 60.3                               | 1.7                             | 10.4       | 72.4        | 66.2                               | 1.4                             | 1.5        | 69.1        |
| Assam             | 45.6                               | 13.3                            | 11.1       | 69.9        | 45.6                               | 9.7                             | 10.1       | 65.4        |
| <b>West</b>       |                                    |                                 |            |             |                                    |                                 |            |             |
| Gujarat           | 5.4                                | 3.9                             | 0.9        | 10.2        | 11.0                               | 17.7                            | 1.4        | 30.1        |
| Maharashtra       | 23.3                               | 2.4                             | 3.0        | 28.6        | 16.2                               | 11.2                            | 2.8        | 30.2        |
| Goa               | 20.9                               | 0.4                             | 1.4        | 22.6        | 13.8                               | 2.1                             | 0.9        | 16.8        |
| <b>South</b>      |                                    |                                 |            |             |                                    |                                 |            |             |
| Andhra Pradesh    | 10.0                               | 1.8                             | 2.2        | 14.0        | 3.4                                | 0.8                             | 0.1        | 4.3         |
| Telangana         | 5.8                                | 3.1                             | 2.8        | 11.6        | 11.7                               | 2.6                             | 1.2        | 15.5        |
| Karnataka         | 38.9                               | 2.4                             | 4.8        | 46.2        | 18.7                               | 12.8                            | 3.7        | 35.3        |
| Kerala            | 1.8                                | 2.4                             | 0.6        | 4.8         | 4.4                                | 2.9                             | 0.3        | 7.6         |
| Tamil Nadu        | 20.8                               | 4.5                             | 1.3        | 26.5        | 30.4                               | 3.0                             | 1.1        | 34.4        |
| Puducherry        | 14.1                               | 2.3                             | 2.3        | 18.7        | 21.5                               | 1.5                             | 0.5        | 23.4        |
| <b>India</b>      | <b>13.2</b>                        | <b>3.4</b>                      | <b>2.3</b> | <b>18.9</b> | <b>15.2</b>                        | <b>11.0</b>                     | <b>2.6</b> | <b>28.8</b> |

1  
2  
3  
4  
5  
6  
7  
8  
9  
10  
11  
12  
13  
14  
15  
16  
17  
18  
19  
20  
21  
22  
23  
24  
25  
26  
27  
28  
29  
30  
31  
32  
33  
34  
35  
36  
37  
38  
39  
40  
41  
42  
43  
44  
45  
46  
47  
48  
49  
50  
51  
52  
53  
54  
55  
56  
57  
58  
59  
60

For peer review only

## STROBE Statement—checklist of items that should be included in reports of observational studies

|                              | Item No | Recommendation                                                                                                                                                                                                                                                                                                                                                                                                                                                                                                                                                                                                                                                                                   | Page No            |
|------------------------------|---------|--------------------------------------------------------------------------------------------------------------------------------------------------------------------------------------------------------------------------------------------------------------------------------------------------------------------------------------------------------------------------------------------------------------------------------------------------------------------------------------------------------------------------------------------------------------------------------------------------------------------------------------------------------------------------------------------------|--------------------|
| <b>Title and abstract</b>    | 2       | (a) Indicate the study's design with a commonly used term in the title or the abstract<br>(b) Provide in the abstract an informative and balanced summary of what was done and what was found                                                                                                                                                                                                                                                                                                                                                                                                                                                                                                    | 2                  |
| <b>Introduction</b>          |         |                                                                                                                                                                                                                                                                                                                                                                                                                                                                                                                                                                                                                                                                                                  |                    |
| Background/rationale         | 5       | Explain the scientific background and rationale for the investigation being reported                                                                                                                                                                                                                                                                                                                                                                                                                                                                                                                                                                                                             | 5-6                |
| Objectives                   | 6       | State specific objectives, including any prespecified hypotheses                                                                                                                                                                                                                                                                                                                                                                                                                                                                                                                                                                                                                                 | 6                  |
| <b>Methods</b>               |         |                                                                                                                                                                                                                                                                                                                                                                                                                                                                                                                                                                                                                                                                                                  |                    |
| Study design                 | 6       | Present key elements of study design early in the paper                                                                                                                                                                                                                                                                                                                                                                                                                                                                                                                                                                                                                                          | 6-7                |
| Setting                      | 6       | Describe the setting, locations, and relevant dates, including periods of recruitment, exposure, follow-up, and data collection                                                                                                                                                                                                                                                                                                                                                                                                                                                                                                                                                                  | 6-7                |
| Participants                 | 6       | (a) <i>Cohort study</i> —Give the eligibility criteria, and the sources and methods of selection of participants. Describe methods of follow-up<br><i>Case-control study</i> —Give the eligibility criteria, and the sources and methods of case ascertainment and control selection. Give the rationale for the choice of cases and controls<br><i>Cross-sectional study</i> —Give the eligibility criteria, and the sources and methods of selection of participants<br>(b) <i>Cohort study</i> —For matched studies, give matching criteria and number of exposed and unexposed<br><i>Case-control study</i> —For matched studies, give matching criteria and the number of controls per case |                    |
| Variables                    | 7       | Clearly define all outcomes, exposures, predictors, potential confounders, and effect modifiers. Give diagnostic criteria, if applicable                                                                                                                                                                                                                                                                                                                                                                                                                                                                                                                                                         | 7-9                |
| Data sources/<br>measurement | 6       | For each variable of interest, give sources of data and details of methods of assessment (measurement). Describe comparability of assessment methods if there is more than one group                                                                                                                                                                                                                                                                                                                                                                                                                                                                                                             | 7-9                |
| Bias                         | 8       | Describe any efforts to address potential sources of bias                                                                                                                                                                                                                                                                                                                                                                                                                                                                                                                                                                                                                                        | 6                  |
| Study size                   | 9       | Explain how the study size was arrived at                                                                                                                                                                                                                                                                                                                                                                                                                                                                                                                                                                                                                                                        | 6                  |
| Quantitative variables       | 8       | Explain how quantitative variables were handled in the analyses. If applicable, describe which groupings were chosen and why                                                                                                                                                                                                                                                                                                                                                                                                                                                                                                                                                                     | 9-10               |
| Statistical methods          | 9-10    | (a) Describe all statistical methods, including those used to control for confounding<br>(b) Describe any methods used to examine subgroups and interactions<br>(c) Explain how missing data were addressed<br>(d) <i>Cohort study</i> —If applicable, explain how loss to follow-up was addressed<br><i>Case-control study</i> —If applicable, explain how matching of cases and controls was addressed<br><i>Cross-sectional study</i> —If applicable, describe analytical methods taking account of sampling strategy<br>(e) Describe any sensitivity analyses                                                                                                                                | 9-10<br>10-10<br>6 |

1  
2  
3  
4  
5  
6  
7  
8  
9  
10  
11  
12  
13  
14  
15  
16  
17  
18  
19  
20  
21  
22  
23  
24  
25  
26  
27  
28  
29  
30  
31  
32  
33  
34  
35  
36  
37  
38  
39  
40  
41  
42  
43  
44  
45  
46  
47  
48  
49  
50  
51  
52  
53  
54  
55  
56  
57  
58  
59  
60

Continued on next page

For peer review only

| <b>Results</b>           |     |                                                                                                                                                                                                                                                                                                                                                                                                               | <b>Page no</b> |
|--------------------------|-----|---------------------------------------------------------------------------------------------------------------------------------------------------------------------------------------------------------------------------------------------------------------------------------------------------------------------------------------------------------------------------------------------------------------|----------------|
| Participants             | 13* | (a) Report numbers of individuals at each stage of study—eg numbers potentially eligible, examined for eligibility, confirmed eligible, included in the study, completing follow-up, and analysed<br>(b) Give reasons for non-participation at each stage<br>(c) Consider use of a flow diagram                                                                                                               | 12             |
| Descriptive data         | 14* | (a) Give characteristics of study participants (eg demographic, clinical, social) and information on exposures and potential confounders<br>(b) Indicate number of participants with missing data for each variable of interest<br>(c) <i>Cohort study</i> —Summarise follow-up time (eg, average and total amount)                                                                                           | 12             |
| Outcome data             | 15* | <i>Cohort study</i> —Report numbers of outcome events or summary measures over time<br><i>Case-control study</i> —Report numbers in each exposure category, or summary measures of exposure<br><i>Cross-sectional study</i> —Report numbers of outcome events or summary measures                                                                                                                             | 12-14          |
| Main results             | 16  | (a) Give unadjusted estimates and, if applicable, confounder-adjusted estimates and their precision (eg, 95% confidence interval). Make clear which confounders were adjusted for and why they were included<br>(b) Report category boundaries when continuous variables were categorized<br>(c) If relevant, consider translating estimates of relative risk into absolute risk for a meaningful time period | 12-14          |
| Other analyses           | 17  | Report other analyses done—eg analyses of subgroups and interactions, and sensitivity analyses                                                                                                                                                                                                                                                                                                                | N.A.           |
| <b>Discussion</b>        |     |                                                                                                                                                                                                                                                                                                                                                                                                               |                |
| Key results              | 18  | Summarise key results with reference to study objectives                                                                                                                                                                                                                                                                                                                                                      | 14             |
| Limitations              | 19  | Discuss limitations of the study, taking into account sources of potential bias or imprecision. Discuss both direction and magnitude of any potential bias                                                                                                                                                                                                                                                    | 18             |
| Interpretation           | 20  | Give a cautious overall interpretation of results considering objectives, limitations, multiplicity of analyses, results from similar studies, and other relevant evidence                                                                                                                                                                                                                                    | 14-18          |
| Generalisability         | 21  | Discuss the generalisability (external validity) of the study results                                                                                                                                                                                                                                                                                                                                         | 19             |
| <b>Other information</b> |     |                                                                                                                                                                                                                                                                                                                                                                                                               |                |
| Funding                  | 22  | Give the source of funding and the role of the funders for the present study and, if applicable, for the original study on which the present article is based                                                                                                                                                                                                                                                 | 19             |

\*Give information separately for cases and controls in case-control studies and, if applicable, for exposed and unexposed groups in cohort and cross-sectional studies.

**Note:** An Explanation and Elaboration article discusses each checklist item and gives methodological background and published examples of transparent reporting. The STROBE checklist is best used in conjunction with this article (freely available on the Web sites of PLoS Medicine at <http://www.plosmedicine.org/>, Annals of Internal Medicine at <http://www.annals.org/>, and Epidemiology at <http://www.epidem.com/>). Information on the STROBE Initiative is available at [www.strobe-statement.org](http://www.strobe-statement.org).



# BMJ Open

## Areca nut consumption with and without tobacco among the adult population: a nationally representative study from India

|                                 |                                                                                                                                                                                                                                                                                                                                                                                                                                                |
|---------------------------------|------------------------------------------------------------------------------------------------------------------------------------------------------------------------------------------------------------------------------------------------------------------------------------------------------------------------------------------------------------------------------------------------------------------------------------------------|
| Journal:                        | <i>BMJ Open</i>                                                                                                                                                                                                                                                                                                                                                                                                                                |
| Manuscript ID                   | bmjopen-2020-043987.R2                                                                                                                                                                                                                                                                                                                                                                                                                         |
| Article Type:                   | Original research                                                                                                                                                                                                                                                                                                                                                                                                                              |
| Date Submitted by the Author:   | 24-Mar-2021                                                                                                                                                                                                                                                                                                                                                                                                                                    |
| Complete List of Authors:       | Singh, Prashant Kumar; National Institute of Cancer Prevention and Research,<br>Yadav, Amit<br>Singh, Lucky; National Institute of Medical Statistics<br>Mazumdar, Sumit; Centre for Health Economics<br>Sinha, Dharendra ; South-East Regional Office, World Health Organisation, WHO FCTC Global Hub on Smokeless Tobacco<br>Straif, Kurt; International Agency for Research on Cancer<br>Singh, Shalini; Indian Council of Medical Research |
| <b>Primary Subject Heading</b>: | Smoking and tobacco                                                                                                                                                                                                                                                                                                                                                                                                                            |
| Secondary Subject Heading:      | Addiction                                                                                                                                                                                                                                                                                                                                                                                                                                      |
| Keywords:                       | Public health < INFECTIOUS DISEASES, Health policy < HEALTH SERVICES ADMINISTRATION & MANAGEMENT, Cancer pain < ONCOLOGY                                                                                                                                                                                                                                                                                                                       |
|                                 |                                                                                                                                                                                                                                                                                                                                                                                                                                                |

SCHOLARONE™  
Manuscripts



I, the Submitting Author has the right to grant and does grant on behalf of all authors of the Work (as defined in the below author licence), an exclusive licence and/or a non-exclusive licence for contributions from authors who are: i) UK Crown employees; ii) where BMJ has agreed a CC-BY licence shall apply, and/or iii) in accordance with the terms applicable for US Federal Government officers or employees acting as part of their official duties; on a worldwide, perpetual, irrevocable, royalty-free basis to BMJ Publishing Group Ltd ("BMJ") its licensees and where the relevant Journal is co-owned by BMJ to the co-owners of the Journal, to publish the Work in this journal and any other BMJ products and to exploit all rights, as set out in our [licence](#).

The Submitting Author accepts and understands that any supply made under these terms is made by BMJ to the Submitting Author unless you are acting as an employee on behalf of your employer or a postgraduate student of an affiliated institution which is paying any applicable article publishing charge ("APC") for Open Access articles. Where the Submitting Author wishes to make the Work available on an Open Access basis (and intends to pay the relevant APC), the terms of reuse of such Open Access shall be governed by a Creative Commons licence – details of these licences and which [Creative Commons](#) licence will apply to this Work are set out in our licence referred to above.

Other than as permitted in any relevant BMJ Author's Self Archiving Policies, I confirm this Work has not been accepted for publication elsewhere, is not being considered for publication elsewhere and does not duplicate material already published. I confirm all authors consent to publication of this Work and authorise the granting of this licence.

1  
2  
3  
4 **Areca nut consumption with and without tobacco among the adult population: a**  
5  
6 **nationally representative study from India**  
7  
8

9 Prashant Kumar Singh<sup>12\*</sup>, Amit Yadav<sup>3</sup>, Lucky Singh<sup>4</sup>, Sumit Mazumdar<sup>5</sup>, Dharendra N.  
10 Sinha<sup>6</sup>, Kurt Straif<sup>7</sup>, Shalini Singh<sup>8</sup>  
11  
12  
13  
14  
15

16 **Running head:** Areca nut consumption in India  
17

18 **Word count:** 3168 (excluding abstract, references, tables)  
19  
20  
21  
22  
23  
24  
25  
26  
27  
28  
29  
30  
31  
32  
33  
34  
35  
36

---

37 \* Corresponding Author: Dr. Prashant Kumar Singh, [prashants.geo@gmail.com](mailto:prashants.geo@gmail.com)

38  
39 <sup>1</sup> Division of Preventive Oncology & Population Health, ICMR-National Institute of Cancer  
40 Prevention and Research, Indian Council of Medical Research (ICMR), Noida, India. Email:  
41 [prashants.geo@gmail.com](mailto:prashants.geo@gmail.com)  
42

43 <sup>2</sup> WHO – FCTC Global Knowledge Hub on Smokeless Tobacco, ICMR-National Institute of Cancer  
44 Prevention and Research, Indian Council of Medical Research (ICMR), Noida  
45

46 <sup>3</sup> Center for Tobacco Control Research and Education, University of California, San Francisco, USA.  
47 Email: [advocateamit@msn.com](mailto:advocateamit@msn.com)

48 <sup>4</sup> ICMR-National Institute of Medical Statistics, Indian Council of Medical Research (ICMR), Ansari  
49 Nagar, New Delhi, India. Email: [lucky.5bhu@gmail.com](mailto:lucky.5bhu@gmail.com)  
50

51 <sup>5</sup>Centre for Health Economics, University of York, YO10 5DD, United Kingdom. Email:  
52 [sumitmazumdar@gmail.com](mailto:sumitmazumdar@gmail.com)  
53

54 <sup>6</sup> School of Preventive Oncology, Patna, India. Email: [dhirendrasinha1@gmail.com](mailto:dhirendrasinha1@gmail.com)

55 <sup>7</sup>International Agency for Research on Cancer (IARC), Lyon, France. Email: [traif.kurt@gmail.com](mailto:traif.kurt@gmail.com)  
56

57 <sup>8</sup> ICMR-National Institute of Cancer Prevention and Research & WHO – FCTC Global Knowledge  
58 Hub on Smokeless Tobacco, ICMR-National Institute of Cancer Prevention and Research, Indian  
59 Council of Medical Research (ICMR), Noida, India. Email: [shalinisingh.icmr@gmail.com](mailto:shalinisingh.icmr@gmail.com)  
60

1  
2  
3 **Areca nut consumption with and without tobacco among the adult population: a**  
4 **nationally representative study from India**  
5  
6  
7

8 **Abstract**  
9

10  
11 **Objective:** Areca nut is one of the most widely consumed substances globally, after nicotine,  
12 ethanol and caffeine and classified as carcinogenic to humans. This study examines the  
13 disparity and determinants of areca nut consumption with and without tobacco in India.  
14  
15

16  
17  
18 **Design:** Nationally representative cross-sectional study.  
19

20  
21 **Participants:** We utilized the nationally representative Global Adult Tobacco Survey  
22 (GATS) 2016-17. The analytical sample size was 74,037 individual's aged 15 years and  
23 above with a response rate of 92.9%.  
24  
25

26  
27  
28 **Measures:** Current consumption of areca nut without tobacco and with tobacco.  
29

30  
31 **Method:** We examined determinants of areca nut consumption (without tobacco and with  
32 tobacco) using multinomial logistic regression, accounting for the survey design.  
33  
34

35  
36 **Results:** About 23.9% (95%CI 23.1-24.8) of the adult population consume areca nut, i.e.  
37 approximately 223.79 million people in India; majority of users (14.2% 95%CI 13.5-14.9)  
38 consumed areca nut with tobacco. When compared to females, males were more likely to  
39 consume areca nut (with tobacco RR=2.02; 95%CI 1.85-2.21 and without tobacco RR=1.13;  
40 95%CI 1.07-1.20). Age, marital status, education, occupation, caste, religion and region were  
41 significantly associated with areca nut consumption. However, the direction and magnitude  
42 of association differs with respect to the areca nut consumption with and without tobacco.  
43  
44  
45  
46  
47  
48  
49  
50

51  
52  
53 **Conclusion:** The on-going tobacco control efforts would not address the majority of areca  
54 nut users until greater attention to areca nut consumption with and without tobacco is  
55 reflected in health policies in India.  
56  
57  
58  
59  
60

1  
2  
3 **Key words:** Areca nut, smokeless tobacco, GATS, India  
4  
5

6 **Strengths and Limitations of this study**  
7  
8

- 9
- 10 • Using a nationally representative survey with a high response rate, this study  
11 disentangled the current prevalence of areca nut consumption with and without  
12 tobacco in India, which has significant policy implications.  
13
  - 14 • The study provided detailed information on socioeconomic determinants of areca nut  
15 consumption, with and without tobacco, and separately for men and women, which  
16 may further guide future policy  
17
  - 18 • The survey covers only people 15 years and older, whereas areca nut consumption  
19 often starts at younger age.  
20
  - 21 • The survey cannot provide insights into trends of Areca nut consumption over time.  
22  
23  
24  
25  
26  
27  
28  
29
- 30  
31  
32  
33  
34  
35  
36  
37  
38  
39  
40  
41  
42  
43  
44  
45  
46  
47  
48  
49  
50  
51  
52  
53  
54  
55  
56  
57  
58  
59  
60

review only

## Introduction

Areca nut is one of the most widely consumed substances globally, after nicotine, ethanol and caffeine[1,2]. Owing to its addictive properties, areca nut is estimated to be consumed by hundreds of millions of people across various countries [3]. However, addiction to areca nut is primarily prevalent in many Asia-Pacific countries and by emigrants from these countries in other parts of world [3]. It is not only known by several, sometimes local names, but also consumed in several forms e.g. pan masala, gutkha, mawa, dohra, kharra, betel etc. with or without tobacco[4,5]. Some forms of consumption may also include other constituents, such as betel leaf, slaked lime and various spices.

The International Agency for Research on Cancer (IARC) classified areca nut consumption with or without tobacco as carcinogenic to humans[6]. A meta-analysis based on 50 studies worldwide reported increased relative risks for cancer of the oral cavity and oropharynx for the Indian subcontinent and areca nut consumption with tobacco (Relative Risk 7.03; 95%CI, 4.68–10.56) and areca nut consumption without tobacco (Relative Risk 3.22; 95%CI, 2.11–4.92) [7]. A global systematic review based on 62 studies concluded that consumption of areca nut affects almost all organs of the human body, including the brain, heart, lungs, gastrointestinal tract and reproductive organs; and causes or aggravates pre-existing conditions such as neuronal injury, myocardial infarction, cardiac arrhythmias, hepatotoxicity, asthma, central obesity, type II diabetes, hyperlipidemia, metabolic syndrome[8]. It has harmful effects on the foetus when used during pregnancy[8]. Previous studies observed that areca nut dependency among users [9] and its withdrawal effects [10] were similar to those observed among nicotine users [10]. It is also a gateway product in children who start using different kinds of areca nut products at an early age [11].

Despite growing scientific evidence of high addictiveness and several ill effects(8-11) associated with areca nut consumption, research on areca nut has not received much

1  
2  
3 attention[3]. The large global and national movement that addresses tobacco control under  
4 the ambit of the WHO Framework Convention on Tobacco Control (FCTC) has focused  
5 primarily on smoking and has been less effective in controlling smokeless tobacco (SLT)  
6 [12]. The regulatory framework for areca nut control has also remained limited to prescribing  
7 health warnings on areca nut products by the Food Safety and Standard Authority of India  
8 (FSSAI). Further, use of tobacco and nicotine as an ingredient in any food item is also  
9 prohibited under FSSAI regulations, thereby restricting mixing of tobacco in areca nut  
10 products and vice-versa[1]. Although tobacco control policies are applicable to areca nut  
11 products which contain tobacco a considerable number of people now consume areca nut  
12 without tobacco, which poses greater public health challenges in controlling and regulating  
13 the substance [13].  
14  
15  
16  
17  
18  
19  
20  
21  
22  
23  
24  
25  
26  
27  
28

29 A comprehensive search of the literature revealed that studies on areca nut use in India lack  
30 representativeness and published studies were restricted to a specific geographical area or  
31 population groups. None of the published studies have examined diverse habits of areca nut  
32 consumption, its disparity and determinants using a nationally representative survey. Also, a  
33 recent global review calls for more research to better understand the epidemiology of areca  
34 nut consumption across different populations and geographies [3].  
35  
36  
37  
38  
39  
40  
41  
42

43 India, with a population of over 1.30 billion, exhibits one of the highest socioeconomic and  
44 demographic heterogeneities ever experienced anywhere in the world at the regional  
45 level[14]. There is considerable evidence of marked regional inequities in tobacco use[15],  
46 health and healthcare [16]and mortality outcomes [17]in India. These differences are  
47 primarily the outcome of differences in community-level development, population  
48 composition, state health expenditure, poverty levels, status of women, and availability,  
49 accessibility and affordability of maternal and child health care services and their utilization  
50 [18–20].  
51  
52  
53  
54  
55  
56  
57  
58  
59  
60

1  
2  
3 While India's share to overall areca nut production and consumption remains at the top in the  
4 world, no attempts have been made to explore the patterns and determinants of the  
5 consumption of areca nut based on large scale representative surveys. This study aims to  
6 examine the disparity and determinants of areca nut consumption, with and without tobacco  
7 using the nationally-representative Global Adult Tobacco Survey (GATS) conducted in 2016-  
8 17.

## 17 **Methods and materials**

### 20 ***Study Design and Participants***

23 We utilized the nationally representative cross-sectional Global Adult Tobacco Survey  
24 (GATS) 2016-17, conducted in all 29 states and three Union Territories (UTs) of India [21].  
25 The study included whole GATS sample of 74,037 adults aged 15 and above. A multi-stage  
26 sampling design separately for rural and urban areas was adopted to draw a representative  
27 sample considering the 2011 census population figures. The person level response rate was  
28 96.0 percent (95.6% in urban areas and 96.3% in rural areas). The overall response rate,  
29 calculated as the product of response rates at the household and person level, was 92.9  
30 percent.

31  
32  
33  
34  
35  
36  
37  
38  
39  
40  
41  
42 The sampling was done independently in each state/UT; and within the state/UT, it was done  
43 independently for urban and rural areas. In urban areas, a three stage sampling process was  
44 adopted. At the first level, the list of all the wards from all cities and towns of the state/ UT  
45 constituted the urban sampling frame, from which a required sample of wards (Primary  
46 Sampling Units - PSUs) was selected using probability proportional to size (PPS) sampling.  
47  
48  
49 At the second level, a list of all census enumeration blocks (CEBs) in each selected ward  
50 constituted the sampling frame from which one CEB was selected by PPS from each ward. At  
51  
52  
53  
54  
55  
56  
57  
58  
59  
60



1  
2  
3 the third level, a list of all residential households in each selected CEB constituted the  
4  
5 sampling frame, from which a sample of required number of households was selected.  
6  
7

8 In rural areas, a two stage sampling process was adopted. At the first stage of sampling, all  
9  
10 villages in the state/UT formed the sampling frame. All small villages having less than five  
11  
12 households were removed from the sampling frame. Villages with five to 49 households as  
13  
14 per Census of India, 2011 were linked with the neighbouring larger villages. The required  
15  
16 number of PSUs (villages) within each stratum was selected according to PPS sampling. At  
17  
18 the second stage, a list of all residential households in each selected village constituted the  
19  
20 sampling frame, from which a sample of the required number of households was selected.  
21  
22  
23

24 A household listing operation was carried out in each sample area. All large villages with 300  
25  
26 or more households were segmented into three or more segments (depending on village size)  
27  
28 of almost equal proportions, each being about 100-200 households. From all the segments in  
29  
30 each large village, two segments were selected by using PPS sampling. Thirty households  
31  
32 (plus three more, accounting for non-response) were selected from the list of households by  
33  
34 systematic random sampling. The 33 selected households in a PSU were divided into two  
35  
36 groups: 1) households for interview of a male member, and 2) households for interview of a  
37  
38 female member; this was in proportion to the total sample size of male and female interviews  
39  
40 in a state. From the total number of male/ female members aged 15 or above in a household,  
41  
42 one member was randomly selected for the interview.  
43  
44  
45  
46  
47

48 Further details related to survey methodology, sampling design, household and individual  
49  
50 selection, data collection, management and monitoring procedures have been described  
51  
52 elsewhere[21].  
53  
54

### 55 ***Dependent variables***

56  
57  
58  
59  
60

The outcome variable was current consumption of areca nut use, assessed based on the following questions covered in the GATS:

- i. Do you consume *pan masala* without tobacco? (response options: yes, no and refused)
- ii. Do you consume betel quid without tobacco? (response options: yes, no and refused)
- iii. Do you consume areca nut of any type, plain, powdered or flavoured? (response options: yes, no and refused)
- iv. Betel quid with tobacco? (response: on average, how many times a day do you use)
- v. *Gutka*, areca nut-tobacco lime mixture, or *mawa*? (response: on average, how many times a day do you use)
- vi. *Pan masala* with tobacco? (response: on average, how many times a day do you use)

Based on the above-mentioned questions asked in GATS, we constructed three sets of variables: (i) areca nut consumption only without tobacco, (ii) areca nut consumption only with tobacco and (iii) areca nut consumption with and without tobacco, dual use. Definition of specific products can be found with the GATS 2 national report[22].

### ***Independent variables***

A range of socioeconomic (education, occupation, caste, religious affiliation and wealth quintile), demographic (age, sex, marital status,), awareness related and contextual level variables included in this study which were found to be associated with areca nut consumption in previous studies [23–27]. These variables include age (categorised as 15-18, 19-23, 24-30, 31-40, 41-50, 51-60 and 60+) and sex as male and female. Individual's education was measured as: (i) no formal education, (ii) below primary, (iii) primary completed, (iv) below secondary, (v) secondary completed, (vi) completed higher secondary, (vii) completed college/university and (viii) completed post-graduate level. Individual's

1  
2  
3 occupation on the other side was assessed based on self-reported information as (i) student,  
4  
5 (ii) government sector, (iii) non-government sector, (iv) casual/ daily labourer, (v) self-  
6  
7 employed, (vi) homemaker, (vii) retired and (viii) unemployed.  
8  
9

10 A wealth index was calculated based on availability of electricity, flush toilet, radio,  
11  
12 television, fixed telephone or cell phone, refrigerator, washing machine,  
13  
14 moped/scooter/motorcycle and car using Principle Component Analysis (PCA)  
15  
16 methodology[28]. There are various ways to assign weighting values to the indicator  
17  
18 variables. Ad hoc weights, such as assigning “1” for a bicycle, “3” for a motorcycle, and “5”  
19  
20 for a car or truck, work to a certain extent, but they are arbitrary and are difficult to assign  
21  
22 when the wealth ordering is not readily apparent. For this reason, Filmer and Pritchett  
23  
24 recommended using principal components analysis (PCA) to assign the indicator weights, the  
25  
26 procedure that is used for the wealth index[29]. This procedure first standardizes the indicator  
27  
28 variables (calculating z scores); then the factor coefficient scores (factor loadings) are  
29  
30 calculated; and finally, for each household, the indicator values are multiplied by the loadings  
31  
32 and summed to produce the household’s index value. In this process, only the first of the  
33  
34 factors produced is used to represent the wealth index. The resulting sum is itself a  
35  
36 standardized score with a mean of zero and a standard deviation of one[28]. Individuals were  
37  
38 divided into five wealth quintiles based on their household score ranges from 1 being poorest  
39  
40 to 5 being wealthiest, with each category representing 20 percent of the score[28].  
41  
42  
43  
44  
45  
46  
47

48 A composite knowledge variable which measures the poor health impact of smokeless  
49  
50 tobacco use was constructed based on the following information asked in the survey:  
51  
52 smokeless tobacco causes serious illness (yes/no), smokeless tobacco cause oral cancer  
53  
54 (yes/no), smokeless tobacco cause dental diseases (yes/no), smokeless tobacco cause harm to  
55  
56 fetus during pregnancy (yes/no), and do you think smokeless tobacco leads to addiction  
57  
58 (yes/no). The new knowledge variable was categorised as: (i) ‘no, to all five awareness’ (ii)  
59  
60

1  
2  
3 'no, to at least one awareness' and (iii) 'yes, to all five awareness'.  
4  
5

6 Caste (social group) as categorised based on individual's self-reporting as Scheduled Castes  
7 (SCs), Scheduled Tribes (STs), Other Backward Classes (OBCs) and others. This broad  
8 categorization of caste is based on their socioeconomic disadvantage in education, health,  
9 nutrition, and employment by federal government. For instance, a study has shown that as  
10 compared to other caste, children (age 2-5 years) and adolescents (age 6-18 years) belonging  
11 to scheduled tribes had the greatest risk of mortality (OR = 1.94, 95% CI = 1.47, 2.57),  
12 followed by those from scheduled castes (OR = 1.35, 95% CI = 1.05, 1.74) and other  
13 backward classes (OR = 1.33, 95% CI = 1.05, 1.67) [17]. Other studies have also shown lower  
14 enrolment and completion of education among scheduled castes and scheduled tribes due to  
15 various factors [30,31]. Religion captures self-reported follower/believer of Hinduism, Islam,  
16 Christianity and others (which mainly include Sikhs, Jains, Buddhists and non-believers). The  
17 study also considered place of residence as rural and urban as well as all 29 states and three  
18 UTs in the analysis.  
19  
20  
21  
22  
23  
24  
25  
26  
27  
28  
29  
30  
31  
32  
33  
34

### 35 36 *Analytical strategy* 37

38  
39 At first, prevalence of areca nut consumption with and without tobacco at national and sub-  
40 national levels along with rural-urban and male-female differences was analyzed. Chi-  
41 squared ( $\chi^2$ ) tests were performed to examine whether variations in areca nut consumption  
42 across independent variables were statistically significant. To examine the associated  
43 between areca nut consumption with various socioeconomic and demographic characteristics,  
44 multinomial logistic regression was used. In the multinomial logit regression, it is assumed  
45 that log odds of outcome/dependent variable either follow linear form or non-binary form;  
46 each outcome/dependent variable is modelled relative to the baseline group or outcome[32].  
47  
48 In this study, we have considered (i) 'non-areca nut user (baseline group)', (ii) 'areca nut  
49 consumption only with tobacco', (iii) areca nut consumption only without tobacco' and (iv)  
50  
51  
52  
53  
54  
55  
56  
57  
58  
59  
60

1  
2  
3 'areca nut consumption with and without tobacco, dual use'. The study reported the relative  
4 risk ratio (RRR) along with 95% confidence intervals [33]. We calculated the population  
5 burden based on GATS weighted sample population figures, which were provided in the  
6 GATS India report[22]. The analysis was adjusted for sampling weights and multistage  
7 sampling design using *svy* command in STATA. Analysis was carried out in STATA, version  
8  
9  
10  
11  
12  
13  
14  
15 [34]

### 16 17 *Ethics statement*

18  
19  
20 The second round of GATS obtained ethical clearance from the Ethics Committee of Tata  
21 Institute of Social Sciences[22]. No ethics clearance was required for this study, as we  
22 performed a secondary analysis using publicly available data.  
23  
24  
25  
26

### 27 28 *Patient and public involvement*

29  
30 No patients were involved in the development of the research question, the outcome measures  
31 or the design of the study.  
32  
33  
34

## 35 36 **Results**

### 37 38 *Descriptive statistics*

39  
40 Of the 74037 respondents, 40265 (48.9%) were women and 33772 (51.1%) were men, and  
41 47549 (65.5%) individuals resided in rural areas. One out of four respondents had no formal  
42 education and nearly 78% were aware about the adverse health effects of SLT consumption  
43  
44  
45  
46  
47  
48 **(Supplementary table 1).**

49  
50 We found that overall, betel quid without tobacco (8.7%; 95%CI 6.7-10.2) was consumed  
51 largely, followed by areca nut of any type (8%; 95%CI 5.9-10.3) at the national level (**Table**  
52  
53  
54  
55  
56  
57  
58  
59  
60  
61  
62  
63  
64  
65  
66  
67  
68  
69  
70  
71  
72  
73  
74  
75  
76  
77  
78  
79  
80  
81  
82  
83  
84  
85  
86  
87  
88  
89  
90  
91  
92  
93  
94  
95  
96  
97  
98  
99  
100  
101  
102  
103  
104  
105  
106  
107  
108  
109  
110  
111  
112  
113  
114  
115  
116  
117  
118  
119  
120  
121  
122  
123  
124  
125  
126  
127  
128  
129  
130  
131  
132  
133  
134  
135  
136  
137  
138  
139  
140  
141  
142  
143  
144  
145  
146  
147  
148  
149  
150  
151  
152  
153  
154  
155  
156  
157  
158  
159  
160  
161  
162  
163  
164  
165  
166  
167  
168  
169  
170  
171  
172  
173  
174  
175  
176  
177  
178  
179  
180  
181  
182  
183  
184  
185  
186  
187  
188  
189  
190  
191  
192  
193  
194  
195  
196  
197  
198  
199  
200  
201  
202  
203  
204  
205  
206  
207  
208  
209  
210  
211  
212  
213  
214  
215  
216  
217  
218  
219  
220  
221  
222  
223  
224  
225  
226  
227  
228  
229  
230  
231  
232  
233  
234  
235  
236  
237  
238  
239  
240  
241  
242  
243  
244  
245  
246  
247  
248  
249  
250  
251  
252  
253  
254  
255  
256  
257  
258  
259  
260  
261  
262  
263  
264  
265  
266  
267  
268  
269  
270  
271  
272  
273  
274  
275  
276  
277  
278  
279  
280  
281  
282  
283  
284  
285  
286  
287  
288  
289  
290  
291  
292  
293  
294  
295  
296  
297  
298  
299  
300  
301  
302  
303  
304  
305  
306  
307  
308  
309  
310  
311  
312  
313  
314  
315  
316  
317  
318  
319  
320  
321  
322  
323  
324  
325  
326  
327  
328  
329  
330  
331  
332  
333  
334  
335  
336  
337  
338  
339  
340  
341  
342  
343  
344  
345  
346  
347  
348  
349  
350  
351  
352  
353  
354  
355  
356  
357  
358  
359  
360  
361  
362  
363  
364  
365  
366  
367  
368  
369  
370  
371  
372  
373  
374  
375  
376  
377  
378  
379  
380  
381  
382  
383  
384  
385  
386  
387  
388  
389  
390  
391  
392  
393  
394  
395  
396  
397  
398  
399  
400  
401  
402  
403  
404  
405  
406  
407  
408  
409  
410  
411  
412  
413  
414  
415  
416  
417  
418  
419  
420  
421  
422  
423  
424  
425  
426  
427  
428  
429  
430  
431  
432  
433  
434  
435  
436  
437  
438  
439  
440  
441  
442  
443  
444  
445  
446  
447  
448  
449  
450  
451  
452  
453  
454  
455  
456  
457  
458  
459  
460  
461  
462  
463  
464  
465  
466  
467  
468  
469  
470  
471  
472  
473  
474  
475  
476  
477  
478  
479  
480  
481  
482  
483  
484  
485  
486  
487  
488  
489  
490  
491  
492  
493  
494  
495  
496  
497  
498  
499  
500  
501  
502  
503  
504  
505  
506  
507  
508  
509  
510  
511  
512  
513  
514  
515  
516  
517  
518  
519  
520  
521  
522  
523  
524  
525  
526  
527  
528  
529  
530  
531  
532  
533  
534  
535  
536  
537  
538  
539  
540  
541  
542  
543  
544  
545  
546  
547  
548  
549  
550  
551  
552  
553  
554  
555  
556  
557  
558  
559  
560  
561  
562  
563  
564  
565  
566  
567  
568  
569  
570  
571  
572  
573  
574  
575  
576  
577  
578  
579  
580  
581  
582  
583  
584  
585  
586  
587  
588  
589  
590  
591  
592  
593  
594  
595  
596  
597  
598  
599  
600  
601  
602  
603  
604  
605  
606  
607  
608  
609  
610  
611  
612  
613  
614  
615  
616  
617  
618  
619  
620  
621  
622  
623  
624  
625  
626  
627  
628  
629  
630  
631  
632  
633  
634  
635  
636  
637  
638  
639  
640  
641  
642  
643  
644  
645  
646  
647  
648  
649  
650  
651  
652  
653  
654  
655  
656  
657  
658  
659  
660  
661  
662  
663  
664  
665  
666  
667  
668  
669  
670  
671  
672  
673  
674  
675  
676  
677  
678  
679  
680  
681  
682  
683  
684  
685  
686  
687  
688  
689  
690  
691  
692  
693  
694  
695  
696  
697  
698  
699  
700  
701  
702  
703  
704  
705  
706  
707  
708  
709  
710  
711  
712  
713  
714  
715  
716  
717  
718  
719  
720  
721  
722  
723  
724  
725  
726  
727  
728  
729  
730  
731  
732  
733  
734  
735  
736  
737  
738  
739  
740  
741  
742  
743  
744  
745  
746  
747  
748  
749  
750  
751  
752  
753  
754  
755  
756  
757  
758  
759  
760  
761  
762  
763  
764  
765  
766  
767  
768  
769  
770  
771  
772  
773  
774  
775  
776  
777  
778  
779  
780  
781  
782  
783  
784  
785  
786  
787  
788  
789  
790  
791  
792  
793  
794  
795  
796  
797  
798  
799  
800  
801  
802  
803  
804  
805  
806  
807  
808  
809  
810  
811  
812  
813  
814  
815  
816  
817  
818  
819  
820  
821  
822  
823  
824  
825  
826  
827  
828  
829  
830  
831  
832  
833  
834  
835  
836  
837  
838  
839  
840  
841  
842  
843  
844  
845  
846  
847  
848  
849  
850  
851  
852  
853  
854  
855  
856  
857  
858  
859  
860  
861  
862  
863  
864  
865  
866  
867  
868  
869  
870  
871  
872  
873  
874  
875  
876  
877  
878  
879  
880  
881  
882  
883  
884  
885  
886  
887  
888  
889  
890  
891  
892  
893  
894  
895  
896  
897  
898  
899  
900  
901  
902  
903  
904  
905  
906  
907  
908  
909  
910  
911  
912  
913  
914  
915  
916  
917  
918  
919  
920  
921  
922  
923  
924  
925  
926  
927  
928  
929  
930  
931  
932  
933  
934  
935  
936  
937  
938  
939  
940  
941  
942  
943  
944  
945  
946  
947  
948  
949  
950  
951  
952  
953  
954  
955  
956  
957  
958  
959  
960  
961  
962  
963  
964  
965  
966  
967  
968  
969  
970  
971  
972  
973  
974  
975  
976  
977  
978  
979  
980  
981  
982  
983  
984  
985  
986  
987  
988  
989  
990  
991  
992  
993  
994  
995  
996  
997  
998  
999  
1000

1  
2  
3 without tobacco and areca nut of any type were largely consumed, while in the rural areas it  
4 was mainly betel quid without tobacco. Regional pattern suggests that betel quid with tobacco  
5 were predominately consumed in many north-eastern states, while betel quid without tobacco  
6 was mainly used in south (**Supplementary table 2**).

### ***Regional disparity in areca nut consumption***

15 We found 23.9 (95%CI 23.1-24.8) adults were consuming areca nut at national level and  
16 14.2% (95%CI 13.6-14.9) were consuming areca nut without tobacco (**Table 2**). **Figure 1**  
17 shows considerable variations in areca nut consumption across states and UTs of India. In  
18 many states areca nut consumption in any form was over 40% among men (like, Uttar  
19 Pradesh, Assam Meghalaya, Mizoram, and Manipur) and women (like, Karnataka, and all  
20 north-eastern states except Nagaland). Areca nut consumption without tobacco was largely  
21 being consumed across north-eastern states, apart from other bigger states like Karnataka  
22 (28.8%; 95%CI 25.6-32.1), Tamil Nadu (25.5%; 95%CI 21.9-29.5) and Maharashtra (20%;  
23 95%CI 17.0-22.5). Nearly 223.4 million people out of the total 932,488,000 population aged  
24 15 and above consume areca nut in India (**Table 3**). The distribution of areca nut users both  
25 in terms of population and proportion across states were as follows: Uttar Pradesh with 49.9  
26 million users contributes to nearly 22% of all areca nut users, followed by Maharashtra with  
27 26.7 million users (12%), Karnataka with 19.8 million (9%) and Tamil Nadu with 17.7  
28 million users (8%). Together, these four states share nearly 51% of all areca nut users in the  
29 country. Not much difference exists between urban and rural areas in areca nut usage patterns  
30 (**Supplementary table 3**). In 18 states/UTs, however, areca nut consumption was higher in  
31 urban areas than rural counterparts. In 13 states/UTs, the opposite pattern was evident.

### ***Demographic and socioeconomic differences in areca nut consumption***

1  
2  
3 Consumption of areca nut in any form was higher among males as compared to females both  
4 at national level as well as in a majority of states (**Supplementary table 4**). All forms of  
5 areca nut consumption were higher in the age group 31-50 years (**Table 4**) as compared with  
6 other age categories. 28.8% men (95%CI 27.7-30.0) and 27.1% widowed/separated/divorced  
7 (95%CI 25.3-29.1) were consuming areca nut. Individuals who had completed below the  
8 primary level of schooling consumed higher proportion of areca nut. Areca nut consumption  
9 was highest among daily wage labourers (30.2%; 95%CI 28.7-31.7). We found that a high  
10 percentage of Scheduled Tribes (25.6%; 95%CI 23.0-27.5) and Muslims (30.8%; 95%CI  
11 28.4-33.2) were consuming areca nut.  
12  
13  
14  
15  
16  
17  
18  
19  
20  
21  
22

### ***Determinants of areca nut consumption: regression analysis***

23  
24  
25  
26  
27 Regression results suggest that as compared to 15-18 age group, the likelihood of areca nut  
28 consumption with tobacco and dual use was higher in higher age groups (**Table 5**); except  
29 that areca nut consumption without tobacco was lower among the age group 51 and above, as  
30 compared to the 15-18 age groups. Probability of areca nut consumption was higher among  
31 males as compared to females for all three forms. The likelihood of areca nut consumption  
32 without tobacco was higher across all the educational categories as compared to those who  
33 had no formal education. However, the probability of areca nut consumption with tobacco  
34 and in dual-form was declining with increase in the education level of respondents. The  
35 likelihood of areca nut consumption with tobacco and dual-use was significantly higher  
36 among Schedules Castes than Other castes. Probability of all the three forms of areca nut  
37 consumption was higher among Muslims as compared to Hindus.  
38  
39  
40  
41  
42  
43  
44  
45  
46  
47  
48  
49  
50  
51

### **Discussion**

52  
53  
54  
55  
56 The findings of the study revealed that nearly one out of every four adults in India consumes  
57 areca nut, that is, almost 223.79 million users, making areca nut consumption a bigger public  
58  
59  
60

1  
2  
3 health challenge than use of smokeless tobacco (199 million users) in dealing with substance  
4 use and addiction in the country. The large number of users of areca nut, a known carcinogen  
5 presents a huge public health challenge for the country. Moreover, nearly 10% consume areca  
6 nut with tobacco. Thus, considering the wide range of adverse health impacts, effective  
7 implementation on banning of tobacco as an ingredient with areca nut products under  
8 regulation 2.3.4 of the Food Safety and Standards Regulation, 2011 and ban on manufacture  
9 and sale of areca nut products, as implemented in some of the states, is urgently needed [1].

10  
11 We found considerable regional and socioeconomic differences in the consumption of areca  
12 nut. In four states, Meghalaya, Assam, Mizoram and Manipur, over half of the population  
13 consume areca nut. Further, Karnataka, Uttar Pradesh, Tamil Nadu, Maharashtra and Odisha,  
14 constitute nearly 55% of the country's areca nut users. As far as other determinants are  
15 concerned, the findings confirmed that age, gender, marital status, education, occupation,  
16 castes and religion are significantly associated with areca nut consumption. However, the  
17 direction of association differs with respect to areca nut consumption with and without  
18 tobacco. Cheaper and abundant availability, due to large scale domestic production of areca  
19 nut could be one of the key reasons for such high prevalence in the country.

20  
21 We found protective effect of secondary and above level education in the case of areca nut  
22 consumption with and without tobacco. A study from Pakistan also observed that the  
23 consumption of areca nut users increased by grade among school children aged 4 to 16 years  
24 [27]. Areca nut consumption were higher among male than among female, a finding that is  
25 consistent with other studies conducted in Tamil Nadu and Assam in India [26,35] and  
26 countries like Thailand and Taiwan [13]. It may be because areca nut consumption results in  
27 staining of teethe which may not be liked by young and adult females. The age-wise pattern  
28 suggests that areca nut consumption without tobacco began to decline from age 51 onwards.



1  
2  
3 But in the case of areca nut consumption with tobacco and in both forms, it increased with  
4  
5 age.  
6  
7

8 Similar to other studies from India and other neighbouring countries [24,36], we also  
9  
10 observed higher consumption of areca nut with tobacco among daily wage/casual labourers.  
11  
12 This study further adds that areca nut consumption without tobacco too was largely  
13  
14 consumed by daily wage/casual labourers, followed by non-government sector. Evidences  
15  
16 suggests that many misconceptions including consuming areca nut improves concentration,  
17  
18 pleasure, helps in anxiety and muscle relaxation and suppresses appetite increases the  
19  
20 likelihood of consumption among those who are engaged in casual labour and have long  
21  
22 working hours [23,37,38]. We found higher consumption of areca nut among STs and SCs  
23  
24 than other caste groups. Further, Muslims were more likely to consume all three forms of  
25  
26 areca nut as compared with Hindus. Previous studies documented higher consumption of  
27  
28 tobacco including SLT, among SCs/STs and Muslims [25,39].  
29  
30  
31  
32  
33

34 Urban-rural differences by state suggest that in 18 states, areca nut consumption was higher  
35  
36 in urban areas than in rural areas. Regression results also revealed higher consumption of  
37  
38 areca nut without tobacco in urban areas than rural counterparts. This is likely due to higher  
39  
40 awareness about harms related to tobacco use in urban areas than rural counterparts. Studies  
41  
42 from India and Pakistan documented that *pan masala* and *gutka* are very popular even in  
43  
44 urban areas due to aggressive advertising, targeting middle class and adolescents, which  
45  
46 improved sale many tobacco and related products including areca nut [40].  
47  
48  
49

50 Our study had some limitations. Information related to areca nut consumption in different  
51  
52 forms in the GATS was based on respondents self-reporting. Thus, the study cannot rule out  
53  
54 social desirability bias – a tendency among some people to respond to questions in a way  
55  
56 which they deem to be more acceptable than would be their ‘correct’ answer [41]. The  
57  
58 nomenclature of various areca nut products in geographically diverse country like India could  
59  
60

1  
2  
3 be a source of concern, which is difficult to capture in the large scale surveys. Considering  
4  
5 the cross-sectional design of the survey, we did not examine the cause and effect relationship  
6  
7 between socioeconomic characteristics and areca nut consumption. Similarly, the available  
8  
9 data did not allow us to estimate trends of areca nut usage over time, but future analyses of  
10  
11 repeated GATS may inform on important trends. Another limitation is that the study is based  
12  
13 on 15 years and older population, whereas the areca nut habits often start at younger age. The  
14  
15 future Global Youth Tobacco Survey (GYTS) should have areca nut related questions similar  
16  
17 to GATS so that detailed usage pattern of areca nut could be examined among younger  
18  
19 population of the country.  
20  
21  
22

## 23 24 **Conclusion**

25  
26  
27 It is now well established that areca nut consumption in any form is highly addictive, a well-  
28  
29 known risk factor for oral, pharynx and oesophageal cancers and is associated with many  
30  
31 adverse health effects. This study adds to the existing knowledge that areca nut consumption  
32  
33 in India was much higher than the overall smokeless tobacco. Moreover, a significant  
34  
35 proportion of areca nut was consumed along with tobacco, which elevates the adverse health  
36  
37 impacts and co-morbidities further. Thus, it calls for urgent policy intervention to prevent  
38  
39 both new generations from taking up areca nut consumption habit and helping current users  
40  
41 to quit. Such policy efforts to control areca nut consumption should be guided by the huge  
42  
43 differences in its consumption across states, gender and socioeconomic groups in India.  
44  
45 Unlike tobacco, for which the WHO FCTC provides evidence-based policies, no global  
46  
47 policy exists for the regulation and control of areca nut consumption and its cessation. Also,  
48  
49 there is a need for further research and population-based interventions to find treatment for  
50  
51 areca nut dependence. In addition, research is needed to examine the intention to quit among  
52  
53 areca nut users, separately for all three categories - those who consumption areca nut with  
54  
55 tobacco, without tobacco and those who consume in both the forms, to develop an  
56  
57  
58  
59  
60

1  
2  
3 appropriate intervention model for cessation. This information may be collected within the  
4  
5 GATS survey by adding a few additional questions on areca nut for future analysis. Given  
6  
7 that areca nut consumption follows a complex pattern by SES and regional trajectories,  
8  
9 separately for with and without tobacco, future research is needed to explore the various  
10  
11 intersections between SES and areca nut consumption in different regions of India to gain  
12  
13 better clarity.  
14  
15

### 16 17 **Contributorship statement**

18  
19  
20 PKS conceived the study. PKS and LS performed the statistical analysis. PKS and LS  
21  
22 analyzed and interpreted the data. PKS and AY drafted the manuscript. SM, DNS, KS and SS  
23  
24 provided comments and contributed to the development of the final draft of the manuscript.  
25  
26 All authors have supervised and approved the manuscript.  
27  
28

### 29 30 **Competing Interest**

31  
32  
33 None declared.  
34  
35

### 36 37 **Funding**

38  
39  
40 This research study received no specific grant from any funding agency in the public,  
41  
42 commercial or not-for-profit sectors.  
43  
44

### 45 46 **Data sharing statement**

47  
48  
49 Data utilized by the study is available by emailing [prashants.geo@gmail.com](mailto:prashants.geo@gmail.com).  
50  
51  
52  
53  
54  
55  
56  
57  
58  
59  
60

## Reference

- 1 Gupta PC, Ray CS, Papke RL, *et al.* Perspectives on areca nut with some global implications: Symposium report. *Transl Res Oral Oncol* 2018;**3**:2057178X18814068.
- 2 Warnakulasuriya S, Peters TJ. Introduction: Biology, medical and socio-economic aspects of areca nut use. *Addict Biol* 2002;**7**:75–6.
- 3 Mehrtash H, Duncan K, Parascandola M, *et al.* Defining a global research and policy agenda for betel quid and areca nut. *Lancet Oncol* 2017;**18**:e767–75.
- 4 National Institute of Cancer Prevention and Research (ICMR). Commonly used smokeless tobacco products around the globe. 2020.<https://untobaccocontrol.org/kh/smokeless-tobacco/paan-betel-quid-tobacco/>
- 5 Patidar KA, Parwani R, Wanjari SP, *et al.* Various terminologies associated with areca nut and tobacco chewing: A review. *J Oral Maxillofac Pathol JOMFP* 2015;**19**:69.
- 6 WHO, IARC Working Group on the Evaluation of Carcinogenic Risks, Cancer IA for R on. *Betel-quid and areca-nut chewing and some areca-nut-derived nitrosamines*. IARC 2004.
- 7 Guha N, Warnakulasuriya S, Vlaanderen J, *et al.* Betel quid chewing and the risk of oral and oropharyngeal cancers: A meta-analysis with implications for cancer control. *Int J cancer* 2014;**135**:1433–43.
- 8 Garg A, Chaturvedi P, Gupta PC. A review of the systemic adverse effects of areca nut or betel nut. *Indian J Med Paediatr Oncol Off J Indian Soc Med Paediatr Oncol* 2014;**35**:3.
- 9 Mirza SS, Shafique K, Vart P, *et al.* Areca nut chewing and dependency syndrome: is the dependence comparable to smoking? A cross sectional study. *Subst Abuse Treat Prev Policy* 2011;**6**:23.
- 10 Papke RL, Horenstein NA, Stokes C. Nicotinic activity of arecoline, the psychoactive element of "Betel Nuts", suggests a basis for habitual use and anti-inflammatory activity. *PLoS One* 2015;**10**:e0140907.
- 11 Chandra PS, Mulla U. Areca nut: the hidden Indian 'gateway' to future tobacco use and oral cancers among youth. *Indian J Med Sci* 2007;**61**:319–21.
- 12 Mehrotra R, Yadav A, Sinha DN, *et al.* Smokeless tobacco control in 180 countries

- 1  
2  
3 across the globe: call to action for full implementation of WHO FCTC measures.  
4  
5 *Lancet Oncol* 2019;**20**:e208–17.  
6
- 7 13 Gupta PC, Warnakulasuriya S. Global epidemiology of areca nut usage. *Addict Biol*  
8 2002;**7**:77–83.  
9
- 10  
11 14 James KS. India's demographic change: opportunities and challenges. *Science (80- )*  
12 2011;**333**:576–80.  
13
- 14  
15 15 Singh PK, Yadav A, Lal P, *et al.* Dual Burden of Smoked and Smokeless Tobacco Use  
16 in India, 2009–2017: A Repeated Cross-Sectional Analysis Based on Global Adult  
17 Tobacco Survey. *Nicotine Tob Res* Published Online First: 2020.  
18 doi:10.1093/ntr/ntaa033  
19
- 20  
21  
22 16 Singh PK. Trends in Child Immunization across Geographical Regions in India: Focus  
23 on Urban-Rural and Gender Differentials. *PLoS One* 2013;**8**.  
24
- 25  
26 17 Subramanian S V, Nandy S, Irving M, *et al.* The mortality divide in India: the  
27 differential contributions of gender, caste, and standard of living across the life course.  
28 *Am J Public Health* 2006;**96**:818–25.  
29
- 30  
31  
32 18 Kumar C, Singh PK, Rai RK. Under-five mortality in high focus states in India: a  
33 district level geospatial analysis. *PLoS One* 2012;**7**:e37515.  
34
- 35  
36 19 Farahani M, Subramanian S V, Canning D. Effects of state-level public spending on  
37 health on the mortality probability in India. *Health Econ* 2010;**19**:1361–76.  
38
- 39  
40 20 Kravdal Ø. Child mortality in India: the community-level effect of education. *Popul*  
41 *Stud (NY)* 2004;**58**:177–92.  
42
- 43  
44 21 TISS, MoHFW. Global Adult Tobacco Survey GATS 2 India 2016-17. New Delhi,  
45 India: 2017.  
46
- 47  
48 22 Tata Institute of Social Sciences and Ministry of Health and Family Welfare  
49 Government of India. Global Adult Tobacco Survey GATS 2 India 2016-2017 Report.  
50 2017. [https://untobaccocontrol.org/kh/smokeless-tobacco/wp-](https://untobaccocontrol.org/kh/smokeless-tobacco/wp-content/uploads/sites/6/2018/06/GATS_.pdf)  
51 [content/uploads/sites/6/2018/06/GATS\\_.pdf](https://untobaccocontrol.org/kh/smokeless-tobacco/wp-content/uploads/sites/6/2018/06/GATS_.pdf)  
52  
53
- 54  
55 23 Ansari ZA, Bano SN, Zulkifle M. Prevalence of tobacco use among power loom  
56 workers-A cross-sectional study. *Indian J community Med Off Publ Indian Assoc Prev*  
57 *Soc Med* 2010;**35**:34.  
58  
59  
60

- 1  
2  
3 24 Bandyopadhyay A, Irfan M. Educational and Wealth Inequalities in Smokeless  
4 Tobacco Use: An Analysis of Rural-Urban Areas of Bangladesh and India. *Subst Abus*  
5 *Res Treat* 2019;**13**:1178221818825074.  
6  
7  
8  
9 25 Bhan N, Karan A, Srivastava S, *et al.* Have socioeconomic inequalities in Tobacco use  
10 in India increased over time? Trends from the national sample surveys (2000–2012).  
11 *Nicotine Tob Res* 2016;**18**:1711–8.  
12  
13  
14 26 Rajan G, Ramesh S, Sankaralingam S. Areca nut use in rural Tamil Nadu: A growing  
15 threat. *Indian J Med Sci* 2007;**61**:332–7.  
16  
17  
18 27 Shah SMA, Merchant AT, Luby SP, *et al.* Addicted schoolchildren: Prevalence and  
19 characteristics of areca nut chewers among primary school children in Karachi,  
20 Pakistan. *J Paediatr Child Health* 2002;**38**:507–10.  
21  
22  
23  
24 28 Rutstein SO, Johnson K. The DHS wealth index . DHS Comp. Reports No. 6. .  
25 2004.<http://dhsprogram.com/pubs/pdf/CR6/CR6.pdf>  
26  
27  
28 29 Filmer D, Pritchett LH. Estimating wealth effects without expenditure data—or tears:  
29 an application to educational enrollments in states of India. *Demography* 2001;**38**:115–  
30 32.  
31  
32  
33 30 Borooah VK. Caste, Religion, and Health Outcomes in India. *Econ Polit Wkly*  
34 2018;**53**:65.  
35  
36  
37 31 Desai S, Dubey A. Caste in 21st century India: Competing narratives. *Econ Polit Wkly*  
38 2012;**46**:40.  
39  
40  
41 32 Scott Long J. Regression models for categorical and limited dependent variables. *Adv*  
42 *Quant Tech Soc Sci* 1997;**7**.  
43  
44  
45 33 Haan P, Uhlenborff A. Estimation of multinomial logit models with unobserved  
46 heterogeneity using maximum simulated likelihood. DIW Discussion Papers 2006.  
47  
48  
49 34 Stata S. Release 15. Statistical software. *StataCorp LP, Coll Station TX* 2017.  
50  
51  
52 35 Mahanta B, Phukan N, Mohapatra PK, *et al.* Betel Nut Chewing Habit and Its  
53 Determinants among Adolescent Boys and Girls in an Industrial Town of Assam,  
54 India.  
55  
56  
57 36 Hashibe M, Jacob BJ, Thomas G, *et al.* Socioeconomic status, lifestyle factors and oral  
58 premalignant lesions. *Oral Oncol* 2003;**39**:664–71.  
59  
60

- 1  
2  
3 37 Gunaseelan R, Shanthi S, Sowmya R, *et al.* Areca nut use among rural residents of  
4 Sriperambudur Taluk: A qualitative study. *Indian J Dent Res* 2007;**18**:11.  
5  
6  
7 38 Thankappan KR, Thresia CU. Tobacco use & social status in Kerala. *Indian J Med Res*  
8 2007;**126**:300.  
9  
10  
11 39 Rani M, Bonu S, Jha P, *et al.* Tobacco use in India: prevalence and predictors of  
12 smoking and chewing in a national cross sectional household survey. *Tob Control*  
13 2003;**12**:e4–e4.  
14  
15  
16 40 Gupta PC, RAY CS. Tobacco and youth in the South East Asian region. *Indian J*  
17 *Cancer* 2002;**39**:5–34.  
18  
19  
20 41 Fisher RJ. Social desirability bias and the validity of indirect questioning. *J Consum*  
21 *Res* 1993;**20**:303–15.  
22  
23  
24  
25  
26  
27  
28  
29  
30  
31  
32  
33  
34  
35  
36  
37  
38  
39  
40  
41  
42  
43  
44  
45  
46  
47  
48  
49  
50  
51  
52  
53  
54  
55  
56  
57  
58  
59  
60

**Figure 1:** Geographical variation in areca nut use among adult men and women in India

**Table 1.** Prevalence (in %) and Number of Users of Different Types of Areca Nut in India, GATS 2016-17

| Tobacco Products                                              | Total          |                | Men              |                | Women          |                | p-value of difference between men and women ( <i>Chi</i> <sup>2</sup> test) | Urban          |                | Rural          |                | p-value of difference between urban and rural areas ( <i>Chi</i> <sup>2</sup> test) |
|---------------------------------------------------------------|----------------|----------------|------------------|----------------|----------------|----------------|-----------------------------------------------------------------------------|----------------|----------------|----------------|----------------|-------------------------------------------------------------------------------------|
|                                                               | % (95%CI)      | Users (in 000) | % (95%CI)        | Users (in 000) | % (95%CI)      | Users (in 000) |                                                                             | % (95%CI)      | Users (in 000) | % (95%CI)      | Users (in 000) |                                                                                     |
| <i>Pan masala</i> without tobacco                             | 4.8 (3.2-5.6)  | 44759          | 6.2 (4.1-8.3)    | 57814          | 3.2 (1.9-5.1)  | 29840          | <0.001                                                                      | 5.2 (3.1-7.7)  | 48489          | 4.5 (2.2-6.8)  | 41962          | >0.005                                                                              |
| <i>Pan masala</i> with Tobacco                                | 2.8 (1.6-3.8)  | 26110          | 4.5 (2.8-5.7)    | 41962          | 1.1 (0.6-2.1)  | 10257          | <0.001                                                                      | 2.3 (1.1-3.8)  | 21447          | 3.1 (1.2-5.2)  | 28907          | >0.005                                                                              |
| Betel Quid without Tobacco                                    | 8.7 (6.7-10.2) | 81126          | 8.4 (5.9-10.8)   | 78329          | 9.0 (6.1-11.9) | 83924          | <0.001                                                                      | 9.1 (6.8-12.6) | 84856          | 8.4 (5.7-10.8) | 78329          | >0.005                                                                              |
| Betel Quid with Tobacco                                       | 5.8 (3.8-7.2)  | 54084          | 7.1 (5.2-9.3)    | 66207          | 5.5 (3.2-7.8)  | 51287          | <0.001                                                                      | 4.3 (2.8-6.3)  | 40097          | 6.6 (4.2-8.3)  | 61544          | <0.005                                                                              |
| Areca Nut of Any Type                                         | 8.0 (5.9-10.3) | 74599          | 8.3 (5.8-11.2)   | 77397          | 7.7 (5.1-9.2)  | 71802          | <0.001                                                                      | 9.1 (6.5-13.1) | 84856          | 7.5 (4.8-9.8)  | 69937          | >0.005                                                                              |
| <i>Gutka</i> , Areca Nut-Tobacco Lime Mixture, or <i>Mawa</i> | 6.8 (5.7-8.6)  | 63409          | 17.8 (15.1-20.2) | 100709         | 2.7 (1.2-4.1)  | 25177          | <0.001                                                                      | 6.3 (3.1-8.7)  | 58747          | 7.1 (4.5-9.8)  | 66207          | <0.005                                                                              |



**Table 2.** Prevalence (in %) of Areca Nut Use in Different Forms across States & Union Territories of India, GATS 2016-17

| States/UTs              | Areca nut use without tobacco only |                    | Areca nut use with tobacco only |                  | Dual use   |                  | Any Form    |                    |
|-------------------------|------------------------------------|--------------------|---------------------------------|------------------|------------|------------------|-------------|--------------------|
| <b>North region</b>     |                                    |                    |                                 |                  |            |                  |             |                    |
| Jammu & Kashmir         | 0.5                                | [0.2,1.2]          | 0.9                             | [0.5,1.5]        | 0.0        | [0.0,0.1]        | 1.4         | [0.8,2.1]          |
| Himachal Pradesh        | 1.2                                | [0.8,1.9]          | 0.3                             | [0.1,0.8]        | 0.0        | [0.0,0.2]        | 1.5         | [1.1,2.3]          |
| Punjab                  | 1.0                                | [0.6,1.6]          | 2.0                             | [0.9,4.2]        | 0.1        | [0.0,0.6]        | 3.1         | [1.8,5.2]          |
| Chandigarh              | 1.7                                | [1.1,2.7]          | 1.6                             | [0.9,3.0]        | 0.1        | [0.0,0.3]        | 3.4         | [2.3,5.1]          |
| Uttarakhand             | 17.5                               | [14.0,21.6]        | 3.8                             | [2.9,4.8]        | 1.3        | [0.7,2.1]        | 22.6        | [18.5,27.1]        |
| Haryana                 | 2.6                                | [1.7,4.0]          | 2.4                             | [1.0,5.3]        | 0.2        | [0.1,0.6]        | 5.2         | [3.3,8.1]          |
| Delhi                   | 15.7                               | [13.0,18.7]        | 2.0                             | [1.3,2.9]        | 1.0        | [0.6,1.7]        | 18.7        | [15.6,22.0]        |
| <b>Central region</b>   |                                    |                    |                                 |                  |            |                  |             |                    |
| Rajasthan               | 7.5                                | [6.3,9.1]          | 6.5                             | [5.3,7.9]        | 1.4        | [0.7,2.5]        | 15.4        | [13.4,17.6]        |
| Uttar Pradesh           | 18.3                               | [16.4,20.3]        | 12.4                            | [11.0,14.0]      | 3.5        | [2.7,4.4]        | 34.2        | [31.9,36.5]        |
| Chhattisgarh            | 8.4                                | [6.4,10.8]         | 7.4                             | [5.9,9.3]        | 1.2        | [0.7,1.8]        | 17.0        | [14.2,20.1]        |
| Madhya Pradesh          | 8.6                                | [7.2,10.2]         | 13.4                            | [11.3,15.9]      | 2.1        | [1.4,3.0]        | 24.1        | [21.2,27.2]        |
| <b>East region</b>      |                                    |                    |                                 |                  |            |                  |             |                    |
| West Bengal             | 13.4                               | [10.7,16.7]        | 4.1                             | [3.0,5.5]        | 3.7        | [2.8,5.0]        | 21.2        | [18.2,24.6]        |
| Jharkhand               | 8.3                                | [6.6,10.3]         | 8.2                             | [6.4,10.5]       | 1.1        | [0.6,2.0]        | 17.6        | [14.3,21.4]        |
| Odisha                  | 11.3                               | [8.6,14.6]         | 11.5                            | [9.6,13.8]       | 4.8        | [3.4,6.6]        | 27.6        | [23.1,32.6]        |
| Bihar                   | 7.0                                | [5.4,9.1]          | 5.0                             | [4.0,6.3]        | 0.5        | [0.3,0.9]        | 12.5        | [10.5,14.8]        |
| <b>Northeast region</b> |                                    |                    |                                 |                  |            |                  |             |                    |
| Sikkim                  | 11.5                               | [8.9,14.9]         | 1.5                             | [0.9,2.6]        | 0.7        | [0.4,1.2]        | 13.7        | [10.8,17.4]        |
| Arunachal Pradesh       | 17.4                               | [14.4,20.8]        | 18.6                            | [13.0,25.8]      | 3.7        | [2.6,5.2]        | 39.7        | [32.6,47.0]        |
| Nagaland                | 9.6                                | [7.6,12.2]         | 15.1                            | [12.7,17.8]      | 5.8        | [4.3,7.8]        | 30.5        | [27.3,34.0]        |
| Manipur                 | 23.7                               | [20.2,27.5]        | 21.0                            | [18.3,24.0]      | 6.0        | [4.6,7.8]        | 50.7        | [47.0,54.4]        |
| Mizoram                 | 52.9                               | [48.3,57.5]        | 0.8                             | [0.4,1.7]        | 4.4        | [3.2,5.9]        | 58.1        | [53.0,62.9]        |
| Tripura                 | 14.3                               | [11.6,17.4]        | 17.0                            | [14.0,20.6]      | 14.0       | [11.0,17.7]      | 45.3        | [42.0,48.7]        |
| Meghalaya               | 63.2                               | [57.5,68.5]        | 1.6                             | [0.9,2.8]        | 6.0        | [4.3,8.2]        | 70.8        | [65.4,75.5]        |
| Assam                   | 45.6                               | [42.8,48.4]        | 11.4                            | [9.9,13.2]       | 10.6       | [9.2,12.2]       | 67.6        | [64.7,70.5]        |
| <b>West region</b>      |                                    |                    |                                 |                  |            |                  |             |                    |
| Gujarat                 | 8.3                                | [6.5,10.5]         | 11.1                            | [8.8,13.9]       | 1.1        | [0.8,1.7]        | 20.5        | [17.8,23.5]        |
| Maharashtra             | 19.6                               | [17.0,22.5]        | 6.9                             | [5.5,8.8]        | 2.9        | [2.0,4.2]        | 29.4        | [25.3,34.0]        |
| Goa                     | 17.3                               | [14.6,20.4]        | 1.3                             | [0.7,2.2]        | 1.1        | [0.7,1.9]        | 19.7        | [16.7,23.1]        |
| <b>South region</b>     |                                    |                    |                                 |                  |            |                  |             |                    |
| Andhra Pradesh          | 6.7                                | [5.2,8.7]          | 1.3                             | [0.7,2.4]        | 1.2        | [0.6,2.4]        | 9.2         | [7.1,11.7]         |
| Telangana               | 8.7                                | [6.9,11.0]         | 2.8                             | [1.8,4.3]        | 2.0        | [1.2,3.3]        | 13.5        | [11.3,16.2]        |
| Karnataka               | 28.8                               | [25.6,32.1]        | 7.7                             | [6.2,9.4]        | 4.3        | [3.4,5.3]        | 40.8        | [36.3,45.2]        |
| Kerala                  | 3.1                                | [2.2,4.3]          | 2.6                             | [1.9,3.6]        | 0.4        | [0.2,1.0]        | 6.1         | [4.7,7.9]          |
| Tamil Nadu              | 25.5                               | [21.9,29.5]        | 3.7                             | [2.5,5.6]        | 1.2        | [0.8,1.7]        | 30.4        | [27.1,34.0]        |
| Puducherry              | 17.7                               | [14.7,21.1]        | 1.9                             | [1.0,3.4]        | 1.4        | [0.9,2.1]        | 21.0        | [17.6,24.9]        |
| <b>India</b>            | <b>14.2</b>                        | <b>[13.6,14.9]</b> | <b>7.3</b>                      | <b>[6.9,7.7]</b> | <b>2.4</b> | <b>[2.2,2.7]</b> | <b>23.9</b> | <b>[23.1,24.8]</b> |

**Table 3.** Population and Share of Areca Nut Use by States & Union Territories (UT) of India, GATS 2016-17

| States/UTs        | Population          | Share (in%)  |
|-------------------|---------------------|--------------|
| Chandigarh        | 33,040              | 0.0          |
| Sikkim            | 68,448              | 0.0          |
| Himachal Pradesh  | 88,112              | 0.0          |
| Jammu & Kashmir   | 1,21,264            | 0.1          |
| Puducherry        | 2,11,680            | 0.1          |
| Goa               | 2,37,779            | 0.1          |
| Arunachal Pradesh | 4,15,800            | 0.2          |
| Nagaland          | 4,59,940            | 0.2          |
| Mizoram           | 4,88,040            | 0.2          |
| Punjab            | 6,99,081            | 0.3          |
| Haryana           | 10,48,632           | 0.5          |
| Manipur           | 11,31,624           | 0.5          |
| Tripura           | 13,16,418           | 0.6          |
| Meghalaya         | 14,93,184           | 0.7          |
| Kerala            | 16,50,843           | 0.7          |
| Uttarakhand       | 17,56,575           | 0.8          |
| Delhi             | 27,61,914           | 1.2          |
| Chhattisgarh      | 32,62,714           | 1.5          |
| Andhra Pradesh    | 36,54,056           | 1.6          |
| Telangana         | 38,09,088           | 1.7          |
| Jharkhand         | 42,61,840           | 1.9          |
| Rajasthan         | 79,00,200           | 3.5          |
| Odisha            | 89,84,904           | 4.0          |
| Bihar             | 90,95,000           | 4.1          |
| Gujarat           | 98,13,760           | 4.4          |
| Madhya Pradesh    | 1,31,45,827         | 5.9          |
| West Bengal       | 1,54,75,728         | 6.9          |
| Assam             | 1,58,33,272         | 7.1          |
| Tamil Nadu        | 1,77,53,296         | 7.9          |
| Karnataka         | 1,98,34,738         | 8.9          |
| Maharashtra       | 2,67,53,412         | 12.0         |
| Uttar Pradesh     | 4,99,32,289         | 22.3         |
| <b>India</b>      | <b>22,37,97,120</b> | <b>100.0</b> |

**Table 4.** Areca Nut Use Pattern by Demographic and Socioeconomic Characteristics, GATS 2016-17

| Background Variables                                 | Areca nut use without tobacco only         |             | Areca nut use with tobacco only            |             | Dual use                                   |           | Any Forms                                  |             |
|------------------------------------------------------|--------------------------------------------|-------------|--------------------------------------------|-------------|--------------------------------------------|-----------|--------------------------------------------|-------------|
|                                                      | %                                          | 95%CI       | %                                          | 95%CI       | %                                          | 95%CI     | %                                          | 95%CI       |
|                                                      | <i>(Chi<sup>2</sup> p-value &lt;0.001)</i> |             | <i>(Chi<sup>2</sup> p-value &lt;0.001)</i> |             | <i>(Chi<sup>2</sup> p-value &lt;0.001)</i> |           | <i>(Chi<sup>2</sup> p-value &lt;0.001)</i> |             |
| <b>Age</b>                                           |                                            |             |                                            |             |                                            |           |                                            |             |
| 15-18                                                | 15.7                                       | [13.9,17.6] | 1.9                                        | [1.4,2.5]   | 0.7                                        | [0.5,1.2] | 18.3                                       | [16.5,20.3] |
| 19-23                                                | 14.8                                       | [13.3,16.4] | 5.4                                        | [4.5,6.4]   | 1.3                                        | [0.9,1.9] | 21.5                                       | [19.8,23.3] |
| 24-30                                                | 14.1                                       | [13.1,15.2] | 8.2                                        | [7.3,9.1]   | 2.4                                        | [2.0,2.9] | 24.7                                       | [23.3,26.1] |
| 31-40                                                | 14.6                                       | [13.6,15.6] | 9.3                                        | [8.6,10.1]  | 2.7                                        | [2.4,3.2] | 26.7                                       | [25.4,28.0] |
| 41-50                                                | 15.2                                       | [14.1,16.3] | 8.1                                        | [7.3,9.0]   | 3.1                                        | [2.6,3.7] | 26.4                                       | [25.0,27.9] |
| 51-60                                                | 13.5                                       | [12.2,14.8] | 8                                          | [7.0,9.0]   | 3.2                                        | [2.6,3.9] | 24.6                                       | [23.1,26.3] |
| 60+                                                  | 11.1                                       | [9.9,12.3]  | 7.8                                        | [6.6,9.0]   | 3.2                                        | [2.6,4.0] | 22.0                                       | [20.2,23.9] |
|                                                      | <i>(Chi<sup>2</sup> p-value &lt;0.001)</i> |             | <i>(Chi<sup>2</sup> p-value &lt;0.001)</i> |             | <i>(Chi<sup>2</sup> p-value &lt;0.001)</i> |           | <i>(Chi<sup>2</sup> p-value &lt;0.001)</i> |             |
| <b>Sex</b>                                           |                                            |             |                                            |             |                                            |           |                                            |             |
| Female                                               | 13.2                                       | [12.5,14.0] | 3.4                                        | [3.0,3.8]   | 2.3                                        | [2.0,2.6] | 18.9                                       | [18.0,19.9] |
| Male                                                 | 15.2                                       | [14.4,16.1] | 11                                         | [10.4,11.8] | 2.6                                        | [2.3,2.9] | 28.8                                       | [27.7,30.0] |
|                                                      | <i>(Chi<sup>2</sup> p-value &lt;0.001)</i> |             | <i>(Chi<sup>2</sup> p-value &lt;0.001)</i> |             | <i>(Chi<sup>2</sup> p-value &lt;0.001)</i> |           | <i>(Chi<sup>2</sup> p-value &lt;0.001)</i> |             |
| <b>Marital Status</b>                                |                                            |             |                                            |             |                                            |           |                                            |             |
| Married                                              | 13.7                                       | [13.1,14.4] | 8.1                                        | [7.6,8.6]   | 2.7                                        | [2.4,3.0] | 24.5                                       | [23.6,25.4] |
| Unmarried                                            | 15.8                                       | [14.6,17.1] | 4.6                                        | [3.9,5.3]   | 1                                          | [0.8,1.4] | 21.4                                       | [20.0,22.9] |
| Widowed/Separated/Divorced                           | 14.3                                       | [12.8,15.9] | 8.3                                        | [7.1,9.7]   | 4.5                                        | [3.7,5.5] | 27.1                                       | [25.3,29.1] |
|                                                      | <i>(Chi<sup>2</sup> p-value &lt;0.001)</i> |             | <i>(Chi<sup>2</sup> p-value &lt;0.001)</i> |             | <i>(Chi<sup>2</sup> p-value &lt;0.001)</i> |           | <i>(Chi<sup>2</sup> p-value &lt;0.001)</i> |             |
| <b>Education</b>                                     |                                            |             |                                            |             |                                            |           |                                            |             |
| No formal education                                  | 11.2                                       | [10.3,12.1] | 8.7                                        | [8.0,9.6]   | 3.7                                        | [3.2,4.2] | 23.6                                       | [22.4,25.0] |
| <Primary completed                                   | 14.7                                       | [13.4,16.1] | 9.7                                        | [8.6,10.9]  | 2.9                                        | [2.4,3.6] | 27.4                                       | [25.6,29.2] |
| Primary completed                                    | 15.4                                       | [14.1,16.9] | 10.0                                       | [8.9,11.2]  | 2.5                                        | [2.0,3.0] | 27.9                                       | [26.2,29.7] |
| <Secondary completed                                 | 16                                         | [14.7,17.3] | 8.5                                        | [7.6,9.5]   | 2.4                                        | [1.9,2.9] | 26.8                                       | [25.3,28.3] |
| Secondary completed                                  | 15.1                                       | [13.8,16.5] | 5.1                                        | [4.4,5.8]   | 1.7                                        | [1.3,2.4] | 21.9                                       | [20.5,23.5] |
| Higher Secondary completed                           | 15.6                                       | [14.0,17.3] | 4.4                                        | [3.6,5.3]   | 1.4                                        | [0.9,2.1] | 21.4                                       | [19.7,23.3] |
| College/University completed                         | 15.5                                       | [13.9,17.3] | 3.0                                        | [2.3,3.8]   | 1.1                                        | [0.7,1.7] | 19.6                                       | [17.8,21.5] |
| Post-graduate completed                              | 12.8                                       | [10.7,15.2] | 2.8                                        | [1.6,4.6]   | 0.9                                        | [0.4,2.4] | 16.5                                       | [14.0,19.3] |
|                                                      | <i>(Chi<sup>2</sup> p-value &lt;0.001)</i> |             | <i>(Chi<sup>2</sup> p-value &lt;0.001)</i> |             | <i>(Chi<sup>2</sup> p-value &lt;0.001)</i> |           | <i>(Chi<sup>2</sup> p-value &lt;0.001)</i> |             |
| <b>Occupation</b>                                    |                                            |             |                                            |             |                                            |           |                                            |             |
| Student                                              | 14.8                                       | [13.2,16.6] | 0.8                                        | [0.5,1.2]   | 0.3                                        | [0.2,0.6] | 15.8                                       | [14.2,17.6] |
| Government Employee                                  | 17.4                                       | [14.9,20.3] | 6.7                                        | [5.1,8.8]   | 1.9                                        | [1.1,3.4] | 26.1                                       | [23.2,29.2] |
| Non-government Employee                              | 16.9                                       | [15.3,18.6] | 10.4                                       | [8.7,12.3]  | 2.7                                        | [2.0,3.8] | 30.0                                       | [27.7,32.5] |
| Daily Wage/Casual Labourer                           | 15.3                                       | [14.2,16.5] | 11.4                                       | [10.4,12.4] | 3.5                                        | [3.0,4.1] | 30.2                                       | [28.7,31.7] |
| Self-employed                                        | 14.9                                       | [13.8,16.2] | 11.7                                       | [10.7,12.7] | 3.1                                        | [2.7,3.7] | 29.7                                       | [28.2,31.4] |
| Homemaker                                            | 12.4                                       | [11.6,13.3] | 3.5                                        | [3.1,4.1]   | 1.9                                        | [1.6,2.3] | 17.9                                       | [16.9,18.9] |
| Retired                                              | 9.1                                        | [7.2,11.6]  | 6.3                                        | [4.1,9.5]   | 2.6                                        | [1.2,5.7] | 18.0                                       | [14.7,22.0] |
| Unemployed able to work                              | 14.6                                       | [11.9,17.8] | 6.5                                        | [4.6,9.2]   | 2.8                                        | [1.7,4.6] | 23.9                                       | [20.3,28.0] |
| Unemployed unable to work                            | 10.7                                       | [8.5,13.2]  | 7                                          | [5.2,9.4]   | 3.4                                        | [2.1,5.4] | 21.1                                       | [18.2,24.4] |
|                                                      | <i>(Chi<sup>2</sup> p-value &lt;0.001)</i> |             | <i>(Chi<sup>2</sup> p-value &lt;0.001)</i> |             | <i>(Chi<sup>2</sup> p-value &lt;0.001)</i> |           | <i>(Chi<sup>2</sup> p-value &lt;0.001)</i> |             |
| <b>Knowledge of adverse health impact of SLT use</b> |                                            |             |                                            |             |                                            |           |                                            |             |
| No                                                   | 11.5                                       | [8.3,15.7]  | 7.7                                        | [5.6,10.4]  | 3.7                                        | [2.2,6.1] | 22.9                                       | [18.6,27.8] |
| Partial                                              | 15.2                                       | [14.1,16.3] | 9                                          | [8.2,9.9]   | 3.4                                        | [2.9,3.9] | 27.5                                       | [26.1,29.0] |
| Full                                                 | 14                                         | [13.4,14.8] | 6.8                                        | [6.4,7.3]   | 2.2                                        | [2.0,2.4] | 23.1                                       | [22.2,24.0] |

1  
2  
3  
4  
5  
6  
7  
8  
9  
10  
11  
12  
13  
14  
15  
16  
17  
18  
19  
20  
21  
22  
23  
24  
25  
26  
27  
28  
29  
30  
31  
32  
33  
34  
35  
36  
37  
38  
39  
40  
41  
42  
43  
44  
45  
46  
47  
48  
49  
50  
51  
52  
53  
54  
55  
56  
57  
58  
59  
60**Caste**

|                        |      |             |     |           |     |           |      |             |
|------------------------|------|-------------|-----|-----------|-----|-----------|------|-------------|
| Others                 | 14.2 | [13.2,15.2] | 6.1 | [5.5,6.9] | 2.6 | [2.2,3.0] | 22.9 | [21.6,24.3] |
| Scheduled Castes       | 12.3 | [11.1,13.5] | 8.4 | [7.5,9.3] | 2.6 | [2.2,3.0] | 23.2 | [21.8,24.6] |
| Scheduled Tribes       | 14.3 | [12.7,16.0] | 8.5 | [7.2,9.5] | 2.8 | [2.1,3.3] | 25.6 | [23.0,27.5] |
| Oother Backward Castes | 15.1 | [14.2,16.1] | 7.3 | [6.8,7.9] | 2.3 | [2.0,2.6] | 24.7 | [23.5,25.9] |

*(Chi<sup>2</sup> p-value <0.001)**(Chi<sup>2</sup> p-value <0.001)**(Chi<sup>2</sup> p-value <0.001)**(Chi<sup>2</sup> p-value <0.001)***Religion**

|           |      |             |     |           |     |           |      |             |
|-----------|------|-------------|-----|-----------|-----|-----------|------|-------------|
| Hindu     | 13.6 | [12.9,14.3] | 7.3 | [6.9,7.8] | 2.3 | [2.1,2.6] | 23.2 | [22.3,24.1] |
| Muslim    | 19   | [17.2,20.9] | 8.5 | [7.3,9.9] | 3.3 | [2.8,4.0] | 30.8 | [28.4,33.2] |
| Christian | 16.2 | [13.6,19.1] | 3.5 | [2.8,4.4] | 2.3 | [1.4,3.7] | 21.9 | [18.9,25.3] |
| Others    | 8.4  | [6.5,10.7]  | 4.1 | [2.7,6.0] | 1.7 | [1.0,3.1] | 14.1 | [11.4,17.4] |

*(Chi<sup>2</sup> p-value <0.001)**(Chi<sup>2</sup> p-value <0.001)**(Chi<sup>2</sup> p-value <0.001)**(Chi<sup>2</sup> p-value <0.001)***Wealth Quintile**

|         |      |             |     |            |     |           |      |             |
|---------|------|-------------|-----|------------|-----|-----------|------|-------------|
| Poorest | 12.1 | [11.1,13.1] | 9.6 | [8.8,10.4] | 3.1 | [2.7,3.6] | 24.7 | [23.4,26.2] |
| Poorer  | 13.7 | [12.8,14.8] | 8.6 | [7.8,9.4]  | 2.9 | [2.5,3.4] | 25.2 | [23.9,26.6] |
| Middle  | 14.6 | [13.5,15.8] | 8.2 | [7.3,9.2]  | 2.4 | [1.9,2.9] | 25.2 | [23.7,26.8] |
| Richer  | 16.1 | [14.8,17.5] | 5.4 | [4.7,6.1]  | 2.0 | [1.5,2.6] | 23.4 | [21.9,25.0] |
| Richest | 15.7 | [14.3,17.3] | 2.7 | [2.2,3.3]  | 1.1 | [0.8,1.6] | 19.5 | [18.0,21.1] |

*(Chi<sup>2</sup> p-value <0.001)**(Chi<sup>2</sup> p-value <0.001)**(Chi<sup>2</sup> p-value <0.001)**(Chi<sup>2</sup> p-value <0.001)***Place of Residence**

|       |      |             |     |           |     |           |      |             |
|-------|------|-------------|-----|-----------|-----|-----------|------|-------------|
| Urban | 15.7 | [14.6,16.9] | 6.1 | [5.4,6.8] | 2.0 | [1.7,2.4] | 23.8 | [22.3,25.4] |
| Rural | 13.5 | [12.7,14.2] | 7.9 | [7.4,8.5] | 2.7 | [2.4,3.0] | 24.1 | [23.1,25.0] |

*(Chi<sup>2</sup> p-value <0.001)**(Chi<sup>2</sup> p-value <0.001)**(Chi<sup>2</sup> p-value <0.001)**(Chi<sup>2</sup> p-value <0.001)***Region**

|           |      |             |      |             |     |            |      |             |
|-----------|------|-------------|------|-------------|-----|------------|------|-------------|
| North     | 5.6  | [4.9,6.4]   | 2.0  | [1.4,2.8]   | 0.4 | [0.3,0.6]  | 8.0  | [7.0,9.1]   |
| Central   | 13.6 | [12.5,14.8] | 11.1 | [10.2,12.1] | 2.6 | [2.2,3.2]  | 27.3 | [25.9,28.8] |
| East      | 10.1 | [8.9,11.6]  | 6.1  | [5.4,6.9]   | 2.4 | [2.0,3.0]  | 18.7 | [17.1,20.4] |
| Northeast | 39.9 | [37.8,42.0] | 11.9 | [10.8,13.2] | 9.6 | [8.6,10.7] | 61.4 | [59.3,63.5] |
| West      | 15.7 | [13.8,17.8] | 8.3  | [7.0,9.8]   | 2.3 | [1.6,3.2]  | 26.3 | [23.3,29.5] |
| South     | 17.3 | [15.8,18.8] | 3.9  | [3.3,4.6]   | 1.9 | [1.6,2.3]  | 23.1 | [21.4,24.9] |

*Chi<sup>2</sup> p-value <0.001*

**Table 5.** Multinomial Regression Analysis showing Determinants of Areca Nut Use, India GATS 2016-17

| Background Variables         | Areca nut use without tobacco |       |         | Areca nut use with tobacco |       |         | Dual use |        |         |      |      |        |
|------------------------------|-------------------------------|-------|---------|----------------------------|-------|---------|----------|--------|---------|------|------|--------|
|                              | RR                            | 95%CI | p-value | RR                         | 95%CI | p-value | RR       | 95%CI  | p-value |      |      |        |
| <b>Age</b>                   |                               |       |         |                            |       |         |          |        |         |      |      |        |
| 15-18 (ref.)                 | 1.00                          |       |         | 1.00                       |       |         | 1.00     |        |         |      |      |        |
| 19-23                        | 0.91                          | 0.81  | 1.02    | 0.106                      | 1.73  | 1.33    | 2.25     | <0.001 | 1.53    | 1.03 | 2.26 | 0.034  |
| 24-30                        | 0.92                          | 0.81  | 1.04    | 0.202                      | 2.37  | 1.83    | 3.08     | <0.001 | 2.26    | 1.54 | 3.33 | <0.001 |
| 31-40                        | 0.92                          | 0.81  | 1.04    | 0.191                      | 2.71  | 2.08    | 3.52     | <0.001 | 2.72    | 1.84 | 4.03 | <0.001 |
| 41-50                        | 0.91                          | 0.80  | 1.04    | 0.159                      | 2.42  | 1.85    | 3.16     | <0.001 | 2.59    | 1.74 | 3.86 | <0.001 |
| 51-60                        | 0.77                          | 0.67  | 0.89    | <0.001                     | 2.14  | 1.62    | 2.81     | <0.001 | 2.53    | 1.68 | 3.80 | <0.001 |
| 60+                          | 0.65                          | 0.56  | 0.75    | <0.001                     | 2.04  | 1.54    | 2.70     | <0.001 | 2.36    | 1.55 | 3.58 | <0.001 |
| <b>Sex</b>                   |                               |       |         |                            |       |         |          |        |         |      |      |        |
| Female (ref.)                | 1.00                          |       |         |                            | 1.00  |         |          |        | 1.00    |      |      |        |
| Male                         | 1.13                          | 1.07  | 1.20    | <0.001                     | 2.02  | 1.85    | 2.21     | <0.001 | 1.81    | 1.72 | 1.92 | 0.001  |
| <b>Marital Status</b>        |                               |       |         |                            |       |         |          |        |         |      |      |        |
| Married (ref.)               | 1.00                          |       |         |                            | 1.00  |         |          |        | 1.00    |      |      |        |
| Unmarried                    | 0.94                          | 0.86  | 1.02    | 0.16                       | 1.06  | 0.93    | 1.20     | 0.382  | 1.12    | 0.92 | 1.36 | 0.273  |
| Widowed/Separated/Divorced   | 1.37                          | 1.24  | 1.50    | <0.001                     | 1.62  | 1.42    | 1.83     | <0.001 | 1.59    | 1.35 | 1.88 | <0.001 |
| <b>Education</b>             |                               |       |         |                            |       |         |          |        |         |      |      |        |
| No formal education (ref.)   | 1.00                          |       |         |                            | 1.00  |         |          |        | 1.00    |      |      |        |
| <Primary completed           | 1.23                          | 1.14  | 1.34    | <0.001                     | 1.01  | 0.91    | 1.12     | 0.867  | 0.93    | 0.80 | 1.08 | 0.318  |
| Primary completed            | 1.20                          | 1.11  | 1.30    | <0.001                     | 1.06  | 0.96    | 1.17     | 0.264  | 0.82    | 0.70 | 0.96 | 0.016  |
| <Secondary completed         | 1.37                          | 1.27  | 1.48    | <0.001                     | 0.99  | 0.89    | 1.09     | 0.774  | 0.90    | 0.77 | 1.05 | 0.177  |
| Secondary completed          | 1.23                          | 1.13  | 1.34    | <0.001                     | 0.79  | 0.70    | 0.89     | <0.001 | 0.75    | 0.62 | 0.91 | 0.003  |
| Higher Secondary completed   | 1.23                          | 1.11  | 1.35    | <0.001                     | 0.74  | 0.64    | 0.86     | <0.001 | 0.74    | 0.59 | 0.93 | 0.011  |
| College/University completed | 1.18                          | 1.06  | 1.31    | 0.003                      | 0.53  | 0.44    | 0.63     | <0.001 | 0.53    | 0.40 | 0.71 | <0.001 |
| Post-graduate completed      | 1.18                          | 1.02  | 1.36    | 0.023                      | 0.35  | 0.25    | 0.48     | <0.001 | 0.43    | 0.27 | 0.68 | <0.001 |
| <b>Occupation</b>            |                               |       |         |                            |       |         |          |        |         |      |      |        |
| Student (ref.)               | 1.00                          |       |         |                            | 1.00  |         |          |        | 1.00    |      |      |        |
| Government Employee          | 1.15                          | 0.99  | 1.34    | 0.06                       | 3.43  | 2.49    | 4.73     | <0.001 | 2.56    | 1.63 | 4.00 | <0.001 |
| Non-government Employee      | 1.59                          | 1.39  | 1.81    | <0.001                     | 4.87  | 3.64    | 6.53     | <0.001 | 4.17    | 2.75 | 6.30 | <0.001 |
| Daily Wage/Casual Labourer   | 1.65                          | 1.46  | 1.87    | <0.001                     | 4.51  | 3.40    | 5.99     | <0.001 | 3.95    | 2.66 | 5.87 | <0.001 |
| Self-employed                | 1.30                          | 1.15  | 1.47    | <0.001                     | 4.34  | 3.27    | 5.75     | <0.001 | 2.87    | 1.94 | 4.27 | <0.001 |

|    |                                 |      |       |      |        |      |       |      |        |      |       |      |        |
|----|---------------------------------|------|-------|------|--------|------|-------|------|--------|------|-------|------|--------|
| 1  |                                 |      |       |      |        |      |       |      |        |      |       |      |        |
| 2  |                                 |      |       |      |        |      |       |      |        |      |       |      |        |
| 3  | Homemaker                       | 1.26 | 1.11  | 1.42 | <0.001 | 2.61 | 1.95  | 3.49 | <0.001 | 2.11 | 1.42  | 3.13 | <0.001 |
| 4  | Retired                         | 0.95 | 0.77  | 1.17 | 0.604  | 2.28 | 1.56  | 3.33 | <0.001 | 2.21 | 1.29  | 3.77 | 0.004  |
| 5  | Unemployed able to work         | 0.91 | 0.76  | 1.08 | 0.287  | 2.91 | 2.09  | 4.05 | <0.001 | 2.04 | 1.28  | 3.25 | 0.003  |
| 6  | Unemployed unable to work       | 1.24 | 1.01  | 1.52 | 0.039  | 2.56 | 1.79  | 3.67 | <0.001 | 2.49 | 1.51  | 4.09 | <0.001 |
| 8  | <b>Knowledge of adverse</b>     |      |       |      |        |      |       |      |        |      |       |      |        |
| 9  | <b>health impact of SLT use</b> |      |       |      |        |      |       |      |        |      |       |      |        |
| 10 | No (ref.)                       | 1.00 |       |      |        | 1.00 |       |      |        | 1.00 |       |      |        |
| 11 | Partial                         | 1.37 | 1.13  | 1.66 | 0.001  | 1.36 | 1.06  | 1.76 | 0.017  | 1.60 | 1.12  | 2.28 | 0.009  |
| 12 | Full                            | 1.22 | 1.01  | 1.48 | 0.056  | 1.04 | 0.81  | 1.34 | 0.759  | 1.23 | 0.87  | 1.74 | 0.249  |
| 14 | <b>Caste</b>                    |      |       |      |        |      |       |      |        |      |       |      |        |
| 15 | Others (ref.)                   | 1.00 |       |      |        | 1.00 |       |      |        | 1.00 |       |      |        |
| 16 | Scheduled Castes                | 1.05 | 0.97  | 1.13 | 0.197  | 1.17 | 1.05  | 1.29 | 0.004  | 1.25 | 1.07  | 1.46 | 0.005  |
| 17 | Scheduled Tribes                | 1.11 | 1.02  | 1.20 | 0.016  | 0.96 | 0.85  | 1.08 | 0.459  | 0.91 | 0.77  | 1.08 | 0.295  |
| 19 | Oother Backward Castes          | 0.95 | 0.89  | 1.01 | 0.087  | 0.96 | 0.88  | 1.05 | 0.346  | 0.80 | 0.70  | 0.92 | 0.001  |
| 20 | <b>Religion</b>                 |      |       |      |        |      |       |      |        |      |       |      |        |
| 21 | Hindu (ref.)                    | 1.00 |       |      |        | 1.00 |       |      |        | 1.00 |       |      |        |
| 23 | Muslim                          | 1.35 | 1.26  | 1.45 | <0.001 | 1.22 | 1.11  | 1.35 | <0.001 | 1.41 | 1.22  | 1.63 | <0.001 |
| 24 | Christian                       | 0.83 | 0.77  | 0.91 | <0.001 | 0.59 | 0.52  | 0.68 | <0.001 | 0.58 | 0.49  | 0.69 | <0.001 |
| 25 | others                          | 0.61 | 0.55  | 0.68 | <0.001 | 0.50 | 0.42  | 0.60 | <0.001 | 0.36 | 0.27  | 0.47 | <0.001 |
| 26 |                                 |      |       |      |        |      |       |      |        |      |       |      |        |
| 27 | <b>Wealth Quintile</b>          |      |       |      |        |      |       |      |        |      |       |      |        |
| 28 | Poorest (ref.)                  | 1.00 |       |      |        | 1.00 |       |      |        | 1.00 |       |      |        |
| 29 | Poorer                          | 0.94 | 0.88  | 1.00 | 0.062  | 0.96 | 0.88  | 1.04 | 0.321  | 1.11 | 0.98  | 1.25 | 0.097  |
| 30 | Middle                          | 1.02 | 0.95  | 1.11 | 0.573  | 0.97 | 0.88  | 1.08 | 0.628  | 1.00 | 0.85  | 1.17 | 0.964  |
| 31 | Richer                          | 1.03 | 0.96  | 1.12 | 0.403  | 0.79 | 0.70  | 0.89 | <0.001 | 0.79 | 0.66  | 0.95 | 0.01   |
| 32 | Richest                         | 1.04 | 0.94  | 1.15 | 0.305  | 0.54 | 0.46  | 0.63 | <0.001 | 0.83 | 0.67  | 1.03 | 0.096  |
| 34 | <b>Place of Residence</b>       |      |       |      |        |      |       |      |        |      |       |      |        |
| 35 | Urban (ref.)                    | 1.00 |       |      |        | 1.00 |       |      |        | 1.00 |       |      |        |
| 36 | Rural                           | 0.94 | 0.90  | 0.99 | 0.024  | 0.94 | 0.87  | 1.01 | 0.092  | 1.07 | 0.95  | 1.20 | 0.262  |
| 38 | <b>Region</b>                   |      |       |      |        |      |       |      |        |      |       |      |        |
| 39 | North (ref.)                    | 1.00 |       |      |        | 1.00 |       |      |        | 1.00 |       |      |        |
| 40 | Central                         | 2.28 | 2.07  | 2.51 | <0.001 | 6.08 | 5.26  | 7.04 | <0.001 | 6.45 | 4.78  | 8.71 | <0.001 |
| 41 | East                            | 2.01 | 1.82  | 2.22 | <0.001 | 3.38 | 2.90  | 3.95 | <0.001 | 6.25 | 4.64  | 8.44 | <0.001 |
| 42 | Northeast                       | 11.8 | 10.84 | 12.9 | <0.001 | 14.8 | 12.77 | 17.1 | <0.001 | 51.5 | 38.90 | 68.2 | <0.001 |
| 43 |                                 | 5    |       | 5    |        | 1    |       | 8    |        | 1    |       | 3    |        |
| 44 | West                            | 3.40 | 3.10  | 3.73 | <0.001 | 4.84 | 4.14  | 5.65 | <0.001 | 5.85 | 4.26  | 8.03 | <0.001 |
| 45 | South                           | 3.67 | 3.37  | 4.01 | <0.001 | 2.29 | 1.95  | 2.68 | <0.001 | 6.14 | 4.57  | 8.25 | <0.001 |

Note: Ref- Reference

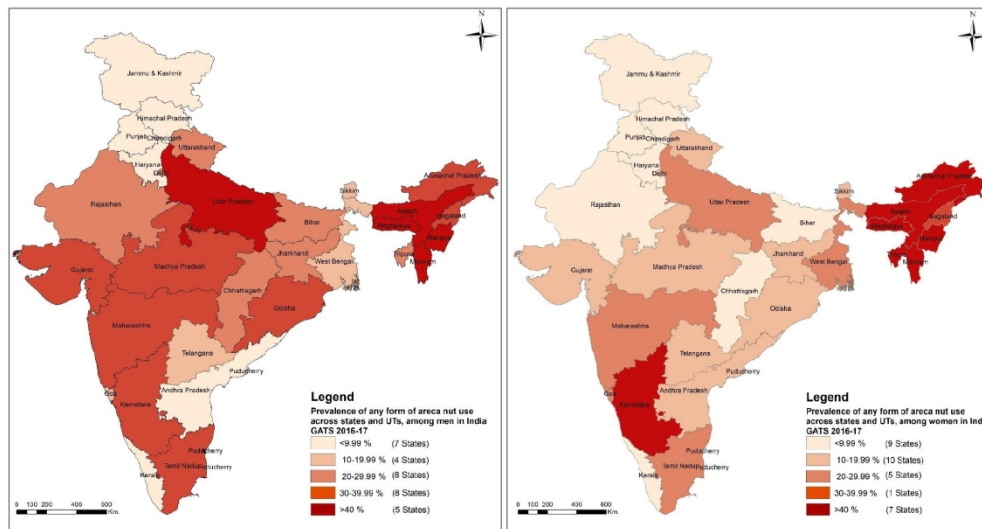

Figure 1: Geographical variation in areca nut use among adult men and women in India

591x312mm (96 x 96 DPI)

**Supplementary Table 1.** Sample Description of the Study Population

| <b>Background Variables</b>  | <i>N</i> | %    | <b>Background Variables</b>                                        | <i>N</i> | %    |
|------------------------------|----------|------|--------------------------------------------------------------------|----------|------|
| <b>Age</b>                   |          |      | <b>Knowledge of Adverse Health Impact of Smokeless Tobacco Use</b> |          |      |
| 15-18                        | 4641     | 10.5 | No                                                                 | 1051     | 1.4  |
| 19-23                        | 7161     | 13.8 | Partial                                                            | 14459    | 20.5 |
| 24-30                        | 13867    | 18.2 | Full                                                               | 58527    | 78.1 |
| 31-40                        | 18839    | 21.0 | <b>Caste</b>                                                       |          |      |
| 41-50                        | 13245    | 15.3 | Others                                                             | 21734    | 26.8 |
| 51-60                        | 8531     | 10.8 | SCs                                                                | 12854    | 19.1 |
| 60+                          | 7753     | 10.4 | STs                                                                | 12128    | 8.9  |
| <b>Sex</b>                   |          |      | OBCs                                                               | 27321    | 45.3 |
| Female                       | 40265    | 48.9 | <b>Religion</b>                                                    |          |      |
| Male                         | 33772    | 51.1 | Hindu                                                              | 54015    | 80.3 |
| <b>Marital Status</b>        |          |      | Muslim                                                             | 8785     | 14.2 |
| Married                      | 56984    | 70.1 | Christian                                                          | 7111     | 2.3  |
| Unmarried                    | 11951    | 23.0 | others                                                             | 4126     | 3.1  |
| Widowed/Separated/Divorced   | 5102     | 6.9  | <b>Wealth Quintile</b>                                             |          |      |
| <b>Education</b>             |          |      | Poorest                                                            | 15547    | 23.4 |
| No formal Education          | 18473    | 26.4 | Poorer                                                             | 18685    | 26.3 |
| <Primary completed           | 7510     | 9.2  | Middle                                                             | 11278    | 16.8 |
| Primary completed            | 8858     | 11.3 | Richer                                                             | 14814    | 19.6 |
| <Secondary completed         | 12109    | 16.9 | Richest                                                            | 13713    | 13.8 |
| Secondary completed          | 10331    | 14.1 | <b>Place of Residence</b>                                          |          |      |
| Higher Secondary completed   | 7959     | 11.2 | Urban                                                              | 26488    | 34.5 |
| College/University completed | 6096     | 7.8  | Rural                                                              | 47549    | 65.5 |
| Post-graduate completed      | 2642     | 3.1  | <b>Region</b>                                                      |          |      |
| <b>Occupation</b>            |          |      | North                                                              | 17128    | 8.7  |
| Student                      | 6134     | 11.9 | Central                                                            | 11518    | 29.1 |
| Government Employee          | 3355     | 2.7  | East                                                               | 9834     | 21.7 |
| Non-government Employee      | 6259     | 8.3  | Northeast                                                          | 13574    | 3.7  |
| Daily Wage/Casual Labourer   | 13749    | 21.2 | West                                                               | 7901     | 15.0 |
| Self-employed                | 13955    | 19.4 | South                                                              | 14082    | 21.8 |
| Homemaker                    | 25833    | 30.1 |                                                                    |          |      |
| Retired                      | 1679     | 2.1  |                                                                    |          |      |
| Unemployed able to work      | 1572     | 1.9  |                                                                    |          |      |
| Unemployed unable to work    | 1471     | 2.3  |                                                                    |          |      |
| Don't know or refused        | 30       | 0.0  |                                                                    |          |      |

All *N* are unweighted



**Supplementary Table 2.** Prevalence (in %) of Areca Nut Use in Different Forms across States & Union Territories of India, GATS 2016-17

| States/UTs        | <i>Pan Masala without Tobacco</i> | <i>Pan Masala with Tobacco</i> | <b>Betel Quid without Tobacco</b> | <b>Betel Quid with Tobacco</b> | <i>Gutka, Areca Nut-Tobacco Lime Mixture, or Mawa</i> | <b>Areca Nut of Any Type</b> |
|-------------------|-----------------------------------|--------------------------------|-----------------------------------|--------------------------------|-------------------------------------------------------|------------------------------|
| <b>North</b>      |                                   |                                |                                   |                                |                                                       |                              |
| Jammu & Kashmir   | 0.2                               | 0.2                            | 0.3                               | 0.8                            | 0.4                                                   | 0.2                          |
| Himachal Pradesh  | 0.7                               | 0.1                            | 0.4                               | 0.0                            | 0.5                                                   | 0.6                          |
| Punjab            | 0.5                               | 0.2                            | 0.3                               | 0.4                            | 2.3                                                   | 0.4                          |
| Chandigarh        | 0.5                               | 0.4                            | 0.6                               | 0.9                            | 1.0                                                   | 1.2                          |
| Uttarakhand       | 3.1                               | 3.1                            | 8.6                               | 2.7                            | 2.2                                                   | 10.8                         |
| Haryana           | 1.3                               | 0.4                            | 0.5                               | 1.1                            | 2.5                                                   | 1.4                          |
| Delhi             | 4.9                               | 1.3                            | 8.3                               | 2.6                            | 3.0                                                   | 7.6                          |
| <b>Central</b>    |                                   |                                |                                   |                                |                                                       |                              |
| Rajasthan         | 3.5                               | 4.6                            | 1.4                               | 4.0                            | 9.0                                                   | 6.1                          |
| Uttar Pradesh     | 7.0                               | 7.2                            | 12.8                              | 10.2                           | 11.5                                                  | 7.6                          |
| Chhattisgarh      | 6.1                               | 1.8                            | 2.1                               | 2.0                            | 7.8                                                   | 3.4                          |
| Madhya Pradesh    | 3.8                               | 4.4                            | 2.4                               | 4.1                            | 13.7                                                  | 6.7                          |
| <b>East</b>       |                                   |                                |                                   |                                |                                                       |                              |
| West Bengal       | 4.8                               | 2.2                            | 5.7                               | 6.4                            | 2.9                                                   | 11.6                         |
| Jharkhand         | 7.4                               | 1.1                            | 1.2                               | 4.9                            | 8.3                                                   | 2.0                          |
| Odisha            | 11.1                              | 8.6                            | 4.9                               | 8.6                            | 9.4                                                   | 5.5                          |
| Bihar             | 5.2                               | 1.4                            | 1.5                               | 3.4                            | 3.7                                                   | 2.3                          |
| <b>North-East</b> |                                   |                                |                                   |                                |                                                       |                              |
| Sikkim            | 4.7                               | 0.5                            | 5.4                               | 2.6                            | 1.2                                                   | 7.0                          |
| Arunachal Pradesh | 11.5                              | 4.7                            | 13.6                              | 14.9                           | 18.9                                                  | 5.1                          |
| Nagaland          | 8.7                               | 21.1                           | 8.8                               | 17.5                           | 9.4                                                   | 2.2                          |
| Manipur           | 7.9                               | 4.2                            | 23.1                              | 38.6                           | 2.7                                                   | 1.1                          |
| Mizoram           | 4.0                               | 0.8                            | 55.1                              | 4.3                            | 4.0                                                   | 5.9                          |
| Tripura           | 6.4                               | 10.4                           | 8.3                               | 39.5                           | 2.5                                                   | 22.6                         |
| Meghalaya         | 10.7                              | 2.5                            | 64.9                              | 12.0                           | 2.4                                                   | 3.8                          |
| Assam             | 10.9                              | 2.9                            | 46.6                              | 19.0                           | 8.2                                                   | 11.9                         |
| <b>West</b>       |                                   |                                |                                   |                                |                                                       |                              |
| Gujarat           | 3.5                               | 1.4                            | 4.9                               | 1.1                            | 12.8                                                  | 4.7                          |
| Maharashtra       | 6.6                               | 1.7                            | 6.7                               | 3.7                            | 8.6                                                   | 17.0                         |
| Goa               | 7.2                               | 1.3                            | 9.6                               | 2.7                            | 2.6                                                   | 11.0                         |
| <b>South</b>      |                                   |                                |                                   |                                |                                                       |                              |
| Andhra Pradesh    | 0.3                               | 0.2                            | 4.9                               | 2.4                            | 1.9                                                   | 5.6                          |
| Telangana         | 2.9                               | 1.1                            | 3.1                               | 3.9                            | 2.9                                                   | 8.0                          |
| Karnataka         | 4.7                               | 0.7                            | 27.8                              | 9.4                            | 5.9                                                   | 8.3                          |

1  
2  
3  
4  
5  
6  
7  
8  
9  
10  
11  
12  
13  
14  
15  
16  
17  
18  
19  
20  
21  
22  
23  
24  
25  
26  
27  
28  
29  
30  
31  
32  
33  
34  
35  
36  
37  
38  
39  
40  
41  
42  
43  
44  
45  
46  
47  
48  
49  
50  
51  
52  
53  
54  
55  
56  
57  
58  
59  
60

|              |            |            |            |            |            |            |
|--------------|------------|------------|------------|------------|------------|------------|
| Kerala       | 1.2        | 0.4        | 2.1        | 4.4        | 0.7        | 0.9        |
| Tamil Nadu   | 0.2        | 0.1        | 18.6       | 6.0        | 0.7        | 19.1       |
| Puducherry   | 0.8        | 0.1        | 7.7        | 3.4        | 0.7        | 15.1       |
| <b>India</b> | <b>4.8</b> | <b>2.8</b> | <b>8.7</b> | <b>5.8</b> | <b>6.8</b> | <b>8.0</b> |

---

For peer review only

**Supplementary Table 3.** Prevalence (in %) of Areca Nut Use in Different Forms by Urban and Rural area Across States & Union Territories of India, GATS 2016-17

| States/UTs        | Urban                              |                                 |          |          | Rural                              |                                 |          |          |
|-------------------|------------------------------------|---------------------------------|----------|----------|------------------------------------|---------------------------------|----------|----------|
|                   | Areca nut use only without tobacco | Areca nut use only with tobacco | Dual use | Any form | Areca nut use only without tobacco | Areca nut use only with tobacco | Dual use | Any form |
| <b>North</b>      |                                    |                                 |          |          |                                    |                                 |          |          |
| Jammu & Kashmir   | 1.2                                | 0.7                             | 0.0      | 1.8      | 0.1                                | 0.9                             | 0.0      | 1.1      |
| Himachal Pradesh  | 3.3                                | 1.6                             | 0.0      | 4.9      | 1.0                                | 0.2                             | 0.0      | 1.2      |
| Punjab            | 1.3                                | 3.7                             | 0.3      | 5.3      | 0.8                                | 0.8                             | 0.1      | 1.7      |
| Chandigarh        | 1.7                                | 1.6                             | 0.1      | 3.5      | 1.9                                | 0.0                             | 0.0      | 1.9      |
| Uttarakhand       | 19.8                               | 4.2                             | 1.4      | 25.4     | 16.3                               | 3.6                             | 1.2      | 21.0     |
| Haryana           | 3.0                                | 4.7                             | 0.4      | 8.2      | 2.3                                | 0.8                             | 0.1      | 3.3      |
| Delhi             | 15.9                               | 2.0                             | 1.0      | 18.9     | 3.4                                | 2.1                             | 0.0      | 5.5      |
| <b>Central</b>    |                                    |                                 |          |          |                                    |                                 |          |          |
| Rajasthan         | 9.1                                | 8.8                             | 1.2      | 19.0     | 7.0                                | 5.6                             | 1.4      | 14.0     |
| Uttar Pradesh     | 26.0                               | 9.2                             | 3.2      | 38.4     | 15.7                               | 13.5                            | 3.5      | 32.7     |
| Chhattisgarh      | 10.6                               | 12.4                            | 1.5      | 24.5     | 7.6                                | 5.6                             | 1.0      | 14.2     |
| Madhya Pradesh    | 11.9                               | 12.3                            | 2.7      | 26.9     | 7.1                                | 13.9                            | 1.8      | 22.9     |
| <b>East</b>       |                                    |                                 |          |          |                                    |                                 |          |          |
| West Bengal       | 8.2                                | 2.4                             | 2.8      | 13.4     | 16.3                               | 5.1                             | 4.3      | 25.7     |
| Jharkhand         | 7.8                                | 7.7                             | 0.8      | 16.3     | 8.4                                | 8.4                             | 1.2      | 18.0     |
| Odisha            | 13.5                               | 13.3                            | 1.6      | 28.4     | 10.8                               | 11.1                            | 5.5      | 27.4     |
| Bihar             | 4.3                                | 5.7                             | 0.4      | 10.4     | 7.4                                | 4.9                             | 0.5      | 12.8     |
| <b>North-East</b> |                                    |                                 |          |          |                                    |                                 |          |          |
| Sikkim            | 13.3                               | 1.3                             | 0.3      | 15.0     | 10.7                               | 1.6                             | 0.9      | 13.2     |
| Arunachal Pradesh | 18.1                               | 13.3                            | 4.4      | 35.8     | 17.1                               | 20.3                            | 3.4      | 40.9     |
| Nagaland          | 10.6                               | 15.2                            | 7.0      | 32.7     | 9.2                                | 15.1                            | 5.2      | 29.4     |
| Manipur           | 27.0                               | 18.7                            | 4.2      | 49.9     | 21.7                               | 22.4                            | 7.1      | 51.2     |
| Mizoram           | 51.5                               | 0.3                             | 6.0      | 57.8     | 54.7                               | 1.3                             | 2.3      | 58.4     |
| Tripura           | 12.5                               | 19.9                            | 10.4     | 42.8     | 15.0                               | 15.8                            | 15.6     | 46.5     |
| Meghalaya         | 52.6                               | 1.9                             | 4.4      | 58.9     | 66.3                               | 1.5                             | 6.4      | 74.2     |
| Assam             | 37.5                               | 11.1                            | 8.5      | 57.1     | 47.2                               | 11.5                            | 11.0     | 69.7     |
| <b>West</b>       |                                    |                                 |          |          |                                    |                                 |          |          |
| Gujarat           | 10.4                               | 10.0                            | 1.3      | 21.7     | 6.5                                | 12.0                            | 1.0      | 19.5     |
| Maharashtra       | 22.0                               | 7.6                             | 3.2      | 32.8     | 17.5                               | 6.3                             | 2.6      | 26.4     |
| Goa               | 16.2                               | 1.3                             | 0.6      | 18.1     | 19.3                               | 1.3                             | 2.2      | 22.7     |
| <b>South</b>      |                                    |                                 |          |          |                                    |                                 |          |          |
| Andhra Pradesh    | 8.3                                | 0.8                             | 0.6      | 9.8      | 5.9                                | 1.5                             | 1.4      | 8.9      |
| Telangana         | 10.7                               | 2.8                             | 2.5      | 16.0     | 7.3                                | 2.8                             | 1.6      | 11.8     |
| Karnataka         | 26.6                               | 6.3                             | 2.9      | 35.8     | 30.3                               | 8.7                             | 5.3      | 44.2     |
| Kerala            | 2.4                                | 1.8                             | 0.5      | 4.7      | 3.7                                | 3.5                             | 0.4      | 7.6      |
| Tamil Nadu        | 26.1                               | 1.1                             | 0.6      | 27.7     | 24.9                               | 6.6                             | 1.7      | 33.2     |
| Puducherry        | 13.5                               | 0.8                             | 0.7      | 15.0     | 27.3                               | 4.5                             | 3.2      | 34.9     |

1  
2  
3  
4  
5  
6  
7  
8  
9  
10  
11  
12  
13  
14  
15  
16  
17  
18  
19  
20  
21  
22  
23  
24  
25  
26  
27  
28  
29  
30  
31  
32  
33  
34  
35  
36  
37  
38  
39  
40  
41  
42  
43  
44  
45  
46  
47  
48  
49  
50  
51  
52  
53  
54  
55  
56  
57  
58  
59  
60

---

|              |             |            |            |             |             |            |            |             |
|--------------|-------------|------------|------------|-------------|-------------|------------|------------|-------------|
| <b>India</b> | <b>15.7</b> | <b>6.1</b> | <b>2.0</b> | <b>23.8</b> | <b>13.5</b> | <b>7.9</b> | <b>2.7</b> | <b>24.1</b> |
|--------------|-------------|------------|------------|-------------|-------------|------------|------------|-------------|

---

For peer review only

**Supplementary Table 4.** Prevalence (in %) of Areca Nut Use in Different Forms by sex Across States & Union Territories of India, GATS 2016-17

| States/UTs        | Female                             |                                 |            |             | Male                               |                                 |            |             |
|-------------------|------------------------------------|---------------------------------|------------|-------------|------------------------------------|---------------------------------|------------|-------------|
|                   | Areca nut use only without tobacco | Areca nut use only with tobacco | Dual use   | Any form    | Areca nut use only without tobacco | Areca nut use only with tobacco | Dual use   | Any form    |
| <b>North</b>      |                                    |                                 |            |             |                                    |                                 |            |             |
| Jammu & Kashmir   | 0.3                                | 0.2                             | 0.1        | 0.6         | 0.6                                | 1.5                             | 0.0        | 2.1         |
| Himachal Pradesh  | 0.1                                | 0.0                             | 0.0        | 0.1         | 2.3                                | 0.6                             | 0.1        | 3.0         |
| Punjab            | 1.1                                | 0.1                             | 0.1        | 1.2         | 0.9                                | 3.7                             | 0.2        | 4.8         |
| Chandigarh        | 2.0                                | 0.4                             | 0.0        | 2.4         | 1.6                                | 2.6                             | 0.1        | 4.3         |
| Uttarakhand       | 16.3                               | 1.1                             | 0.0        | 17.4        | 18.7                               | 6.4                             | 2.5        | 27.6        |
| Haryana           | 2.3                                | 0.6                             | 0.1        | 3.0         | 2.9                                | 3.9                             | 0.4        | 7.2         |
| Delhi             | 11.9                               | 1.0                             | 0.3        | 13.2        | 18.9                               | 2.8                             | 1.6        | 23.3        |
| <b>Central</b>    |                                    |                                 |            |             |                                    |                                 |            |             |
| Rajasthan         | 4.9                                | 2.4                             | 0.1        | 7.4         | 10.1                               | 10.4                            | 2.5        | 23.0        |
| Uttar Pradesh     | 14.3                               | 4.8                             | 1.5        | 20.6        | 21.9                               | 19.5                            | 5.3        | 46.7        |
| Chhattisgarh      | 4.2                                | 1.8                             | 0.2        | 6.2         | 12.5                               | 13.1                            | 2.1        | 27.7        |
| Madhya Pradesh    | 4.9                                | 5.5                             | 1.7        | 12.1        | 12.0                               | 20.9                            | 2.5        | 35.3        |
| <b>East</b>       |                                    |                                 |            |             |                                    |                                 |            |             |
| West Bengal       | 13.9                               | 3.5                             | 5.8        | 23.2        | 13.0                               | 4.7                             | 1.8        | 19.4        |
| Jharkhand         | 9.0                                | 0.6                             | 0.5        | 10.1        | 7.6                                | 15.5                            | 1.6        | 24.7        |
| Odisha            | 9.1                                | 4.7                             | 5.9        | 19.6        | 13.5                               | 18.4                            | 3.7        | 35.6        |
| Bihar             | 2.6                                | 0.4                             | 0.1        | 3.2         | 11.0                               | 9.3                             | 0.9        | 21.1        |
| <b>North-East</b> |                                    |                                 |            |             |                                    |                                 |            |             |
| Sikkim            | 13.1                               | 0.5                             | 0.5        | 14.1        | 10.1                               | 2.5                             | 0.9        | 13.5        |
| Arunachal Pradesh | 27.6                               | 10.2                            | 4.8        | 42.6        | 7.8                                | 26.3                            | 2.6        | 36.8        |
| Nagaland          | 8.5                                | 17.3                            | 5.1        | 30.9        | 10.7                               | 13.1                            | 6.4        | 30.2        |
| Manipur           | 22.3                               | 27.4                            | 4.8        | 54.5        | 25.0                               | 14.7                            | 7.3        | 46.9        |
| Mizoram           | 47.4                               | 1.4                             | 6.7        | 55.5        | 58.4                               | 0.2                             | 2.1        | 60.6        |
| Tripura           | 19.4                               | 21.7                            | 20.6       | 61.6        | 9.4                                | 12.6                            | 7.7        | 29.7        |
| Meghalaya         | 60.3                               | 1.7                             | 10.4       | 72.4        | 66.2                               | 1.4                             | 1.5        | 69.1        |
| Assam             | 45.6                               | 13.3                            | 11.1       | 69.9        | 45.6                               | 9.7                             | 10.1       | 65.4        |
| <b>West</b>       |                                    |                                 |            |             |                                    |                                 |            |             |
| Gujarat           | 5.4                                | 3.9                             | 0.9        | 10.2        | 11.0                               | 17.7                            | 1.4        | 30.1        |
| Maharashtra       | 23.3                               | 2.4                             | 3.0        | 28.6        | 16.2                               | 11.2                            | 2.8        | 30.2        |
| Goa               | 20.9                               | 0.4                             | 1.4        | 22.6        | 13.8                               | 2.1                             | 0.9        | 16.8        |
| <b>South</b>      |                                    |                                 |            |             |                                    |                                 |            |             |
| Andhra Pradesh    | 10.0                               | 1.8                             | 2.2        | 14.0        | 3.4                                | 0.8                             | 0.1        | 4.3         |
| Telangana         | 5.8                                | 3.1                             | 2.8        | 11.6        | 11.7                               | 2.6                             | 1.2        | 15.5        |
| Karnataka         | 38.9                               | 2.4                             | 4.8        | 46.2        | 18.7                               | 12.8                            | 3.7        | 35.3        |
| Kerala            | 1.8                                | 2.4                             | 0.6        | 4.8         | 4.4                                | 2.9                             | 0.3        | 7.6         |
| Tamil Nadu        | 20.8                               | 4.5                             | 1.3        | 26.5        | 30.4                               | 3.0                             | 1.1        | 34.4        |
| Puducherry        | 14.1                               | 2.3                             | 2.3        | 18.7        | 21.5                               | 1.5                             | 0.5        | 23.4        |
| <b>India</b>      | <b>13.2</b>                        | <b>3.4</b>                      | <b>2.3</b> | <b>18.9</b> | <b>15.2</b>                        | <b>11.0</b>                     | <b>2.6</b> | <b>28.8</b> |

1  
2  
3  
4  
5  
6  
7  
8  
9  
10  
11  
12  
13  
14  
15  
16  
17  
18  
19  
20  
21  
22  
23  
24  
25  
26  
27  
28  
29  
30  
31  
32  
33  
34  
35  
36  
37  
38  
39  
40  
41  
42  
43  
44  
45  
46  
47  
48  
49  
50  
51  
52  
53  
54  
55  
56  
57  
58  
59  
60

For peer review only

## STROBE Statement—checklist of items that should be included in reports of observational studies

|                              | Item No | Recommendation                                                                                                                                                                                                                                                                                                                                                                                                                                                                                                                                                                                                                                                                                   | Page No            |
|------------------------------|---------|--------------------------------------------------------------------------------------------------------------------------------------------------------------------------------------------------------------------------------------------------------------------------------------------------------------------------------------------------------------------------------------------------------------------------------------------------------------------------------------------------------------------------------------------------------------------------------------------------------------------------------------------------------------------------------------------------|--------------------|
| <b>Title and abstract</b>    | 2       | (a) Indicate the study's design with a commonly used term in the title or the abstract<br>(b) Provide in the abstract an informative and balanced summary of what was done and what was found                                                                                                                                                                                                                                                                                                                                                                                                                                                                                                    | 2                  |
| <b>Introduction</b>          |         |                                                                                                                                                                                                                                                                                                                                                                                                                                                                                                                                                                                                                                                                                                  |                    |
| Background/rationale         | 5       | Explain the scientific background and rationale for the investigation being reported                                                                                                                                                                                                                                                                                                                                                                                                                                                                                                                                                                                                             | 5-6                |
| Objectives                   | 6       | State specific objectives, including any prespecified hypotheses                                                                                                                                                                                                                                                                                                                                                                                                                                                                                                                                                                                                                                 | 6                  |
| <b>Methods</b>               |         |                                                                                                                                                                                                                                                                                                                                                                                                                                                                                                                                                                                                                                                                                                  |                    |
| Study design                 | 6       | Present key elements of study design early in the paper                                                                                                                                                                                                                                                                                                                                                                                                                                                                                                                                                                                                                                          | 6-7                |
| Setting                      | 6       | Describe the setting, locations, and relevant dates, including periods of recruitment, exposure, follow-up, and data collection                                                                                                                                                                                                                                                                                                                                                                                                                                                                                                                                                                  | 6-7                |
| Participants                 | 6       | (a) <i>Cohort study</i> —Give the eligibility criteria, and the sources and methods of selection of participants. Describe methods of follow-up<br><i>Case-control study</i> —Give the eligibility criteria, and the sources and methods of case ascertainment and control selection. Give the rationale for the choice of cases and controls<br><i>Cross-sectional study</i> —Give the eligibility criteria, and the sources and methods of selection of participants<br>(b) <i>Cohort study</i> —For matched studies, give matching criteria and number of exposed and unexposed<br><i>Case-control study</i> —For matched studies, give matching criteria and the number of controls per case |                    |
| Variables                    | 7       | Clearly define all outcomes, exposures, predictors, potential confounders, and effect modifiers. Give diagnostic criteria, if applicable                                                                                                                                                                                                                                                                                                                                                                                                                                                                                                                                                         | 7-9                |
| Data sources/<br>measurement | 6       | For each variable of interest, give sources of data and details of methods of assessment (measurement). Describe comparability of assessment methods if there is more than one group                                                                                                                                                                                                                                                                                                                                                                                                                                                                                                             | 7-9                |
| Bias                         | 8       | Describe any efforts to address potential sources of bias                                                                                                                                                                                                                                                                                                                                                                                                                                                                                                                                                                                                                                        | 6                  |
| Study size                   | 9       | Explain how the study size was arrived at                                                                                                                                                                                                                                                                                                                                                                                                                                                                                                                                                                                                                                                        | 6                  |
| Quantitative variables       | 8       | Explain how quantitative variables were handled in the analyses. If applicable, describe which groupings were chosen and why                                                                                                                                                                                                                                                                                                                                                                                                                                                                                                                                                                     | 9-10               |
| Statistical methods          | 9-10    | (a) Describe all statistical methods, including those used to control for confounding<br>(b) Describe any methods used to examine subgroups and interactions<br>(c) Explain how missing data were addressed<br>(d) <i>Cohort study</i> —If applicable, explain how loss to follow-up was addressed<br><i>Case-control study</i> —If applicable, explain how matching of cases and controls was addressed<br><i>Cross-sectional study</i> —If applicable, describe analytical methods taking account of sampling strategy<br>(e) Describe any sensitivity analyses                                                                                                                                | 9-10<br>10-10<br>6 |

1  
2  
3  
4  
5  
6  
7  
8  
9  
10  
11  
12  
13  
14  
15  
16  
17  
18  
19  
20  
21  
22  
23  
24  
25  
26  
27  
28  
29  
30  
31  
32  
33  
34  
35  
36  
37  
38  
39  
40  
41  
42  
43  
44  
45  
46  
47  
48  
49  
50  
51  
52  
53  
54  
55  
56  
57  
58  
59  
60

Continued on next page

For peer review only



| <b>Results</b>           |     |                                                                                                                                                                                                                                                                                                                                                                                                               | <b>Page no</b> |
|--------------------------|-----|---------------------------------------------------------------------------------------------------------------------------------------------------------------------------------------------------------------------------------------------------------------------------------------------------------------------------------------------------------------------------------------------------------------|----------------|
| Participants             | 13* | (a) Report numbers of individuals at each stage of study—eg numbers potentially eligible, examined for eligibility, confirmed eligible, included in the study, completing follow-up, and analysed<br>(b) Give reasons for non-participation at each stage<br>(c) Consider use of a flow diagram                                                                                                               | 12             |
| Descriptive data         | 14* | (a) Give characteristics of study participants (eg demographic, clinical, social) and information on exposures and potential confounders<br>(b) Indicate number of participants with missing data for each variable of interest<br>(c) <i>Cohort study</i> —Summarise follow-up time (eg, average and total amount)                                                                                           | 12             |
| Outcome data             | 15* | <i>Cohort study</i> —Report numbers of outcome events or summary measures over time<br><i>Case-control study</i> —Report numbers in each exposure category, or summary measures of exposure<br><i>Cross-sectional study</i> —Report numbers of outcome events or summary measures                                                                                                                             | 12-14          |
| Main results             | 16  | (a) Give unadjusted estimates and, if applicable, confounder-adjusted estimates and their precision (eg, 95% confidence interval). Make clear which confounders were adjusted for and why they were included<br>(b) Report category boundaries when continuous variables were categorized<br>(c) If relevant, consider translating estimates of relative risk into absolute risk for a meaningful time period | 12-14          |
| Other analyses           | 17  | Report other analyses done—eg analyses of subgroups and interactions, and sensitivity analyses                                                                                                                                                                                                                                                                                                                | N.A.           |
| <b>Discussion</b>        |     |                                                                                                                                                                                                                                                                                                                                                                                                               |                |
| Key results              | 18  | Summarise key results with reference to study objectives                                                                                                                                                                                                                                                                                                                                                      | 14             |
| Limitations              | 19  | Discuss limitations of the study, taking into account sources of potential bias or imprecision. Discuss both direction and magnitude of any potential bias                                                                                                                                                                                                                                                    | 18             |
| Interpretation           | 20  | Give a cautious overall interpretation of results considering objectives, limitations, multiplicity of analyses, results from similar studies, and other relevant evidence                                                                                                                                                                                                                                    | 14-18          |
| Generalisability         | 21  | Discuss the generalisability (external validity) of the study results                                                                                                                                                                                                                                                                                                                                         | 19             |
| <b>Other information</b> |     |                                                                                                                                                                                                                                                                                                                                                                                                               |                |
| Funding                  | 22  | Give the source of funding and the role of the funders for the present study and, if applicable, for the original study on which the present article is based                                                                                                                                                                                                                                                 | 19             |

\*Give information separately for cases and controls in case-control studies and, if applicable, for exposed and unexposed groups in cohort and cross-sectional studies.

**Note:** An Explanation and Elaboration article discusses each checklist item and gives methodological background and published examples of transparent reporting. The STROBE checklist is best used in conjunction with this article (freely available on the Web sites of PLoS Medicine at <http://www.plosmedicine.org/>, Annals of Internal Medicine at <http://www.annals.org/>, and Epidemiology at <http://www.epidem.com/>). Information on the STROBE Initiative is available at [www.strobe-statement.org](http://www.strobe-statement.org).
